# Supplementary material for: Differences between the elimination of early and late transition metals: DFT mechanistic insights into the titanium-catalyzed synthesis of pyrroles from alkynes and diazenes
Source: Royal Society of Chemistry journal article supplement (doi:10.1039/c6sc04456e), 2016-12-23
Supplement: c6sc04456e1.pdf [file c6sc04456e1.pdf]

## Supporting Information

### What are the differences between eliminations of early and late transition metals? DFT mechanistic insights into the titanium-catalyzed synthesis of pyrroles from alkynes and diazenes

Jiandong Guo,<sup>†</sup> Xi Deng,<sup>†</sup> Chunyu Song,<sup>†</sup> Shuanglin Qu,<sup>†</sup> Yanfeng Dang,<sup>†,‡</sup> Zhi-Xiang Wang<sup>\*,†,‡</sup>

<sup>†</sup>School of Chemistry and Chemical Engineering, University of Chinese Academy of Sciences, Beijing 100049, China

<sup>‡</sup>Collaborative Innovation Center of Chemical Science and Engineering, Tianjin 300072, China

#### Table of Contents

|                                                                                                       |           |
|-------------------------------------------------------------------------------------------------------|-----------|
| <b>SI1:</b> Fig.S1~Fig.S10 and Table S1 and Table S2 .....                                            | (S2~S15)  |
| <b>SI2:</b> Details results for spin-orbit coupling calculations .....                                | (S16~S18) |
| <b>SI3:</b> Cartesian coordinates, SCF energies, and free energies for all optimized structures ..... | (S19~S77) |

SI1: Fig.S1~Fig.S10, Table S1 and Table S2

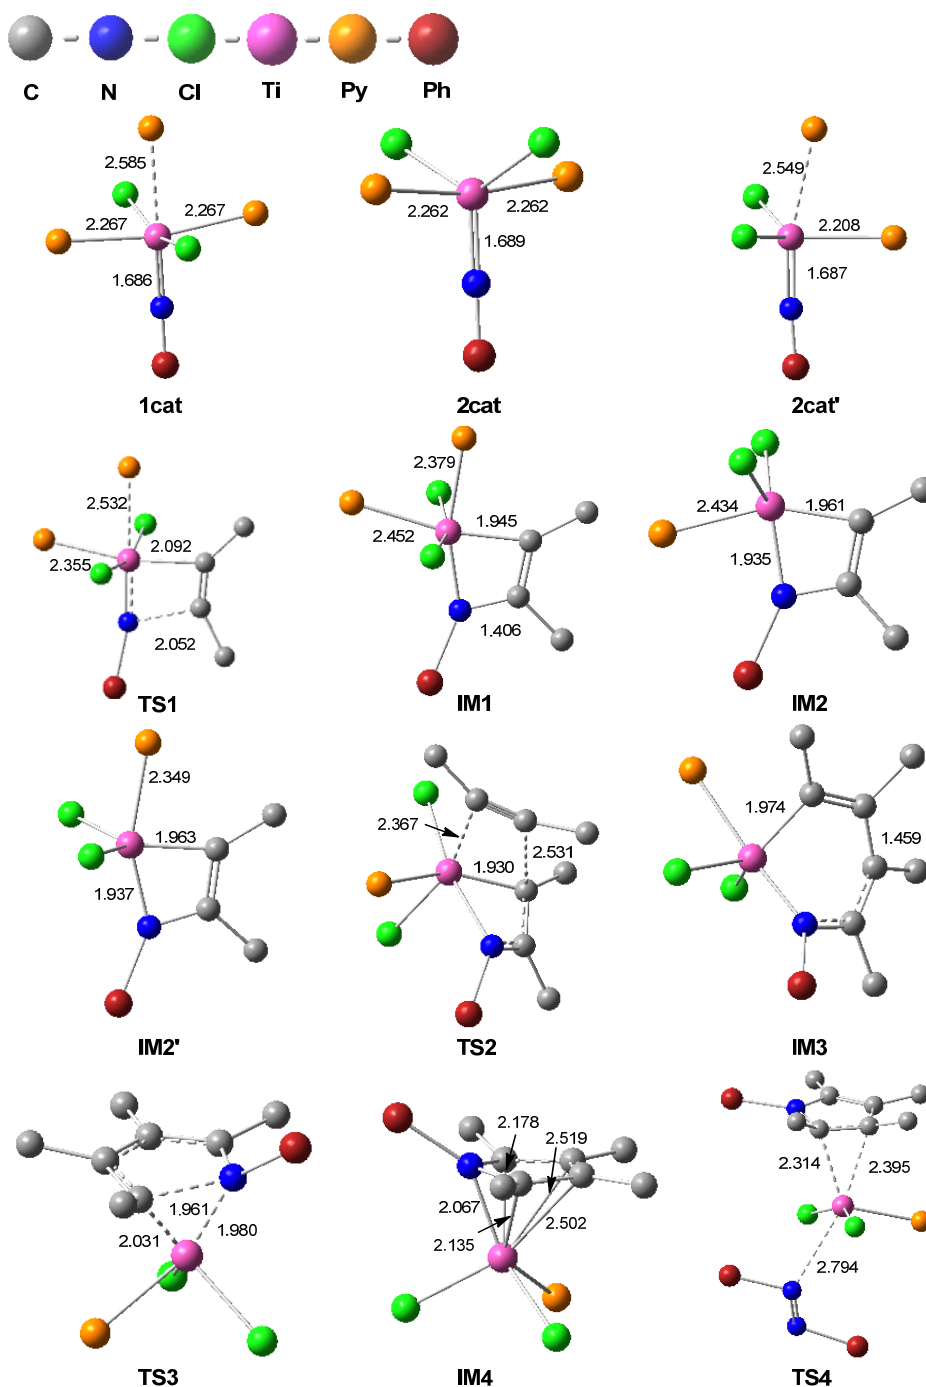

**Fig.S1.** B3LYP/6-31G(d,p) optimized structures of stationary points involved in Fig.1 and 3A, along with key bond lengths in angstroms. Trivial hydrogen atoms are omitted for clarity.

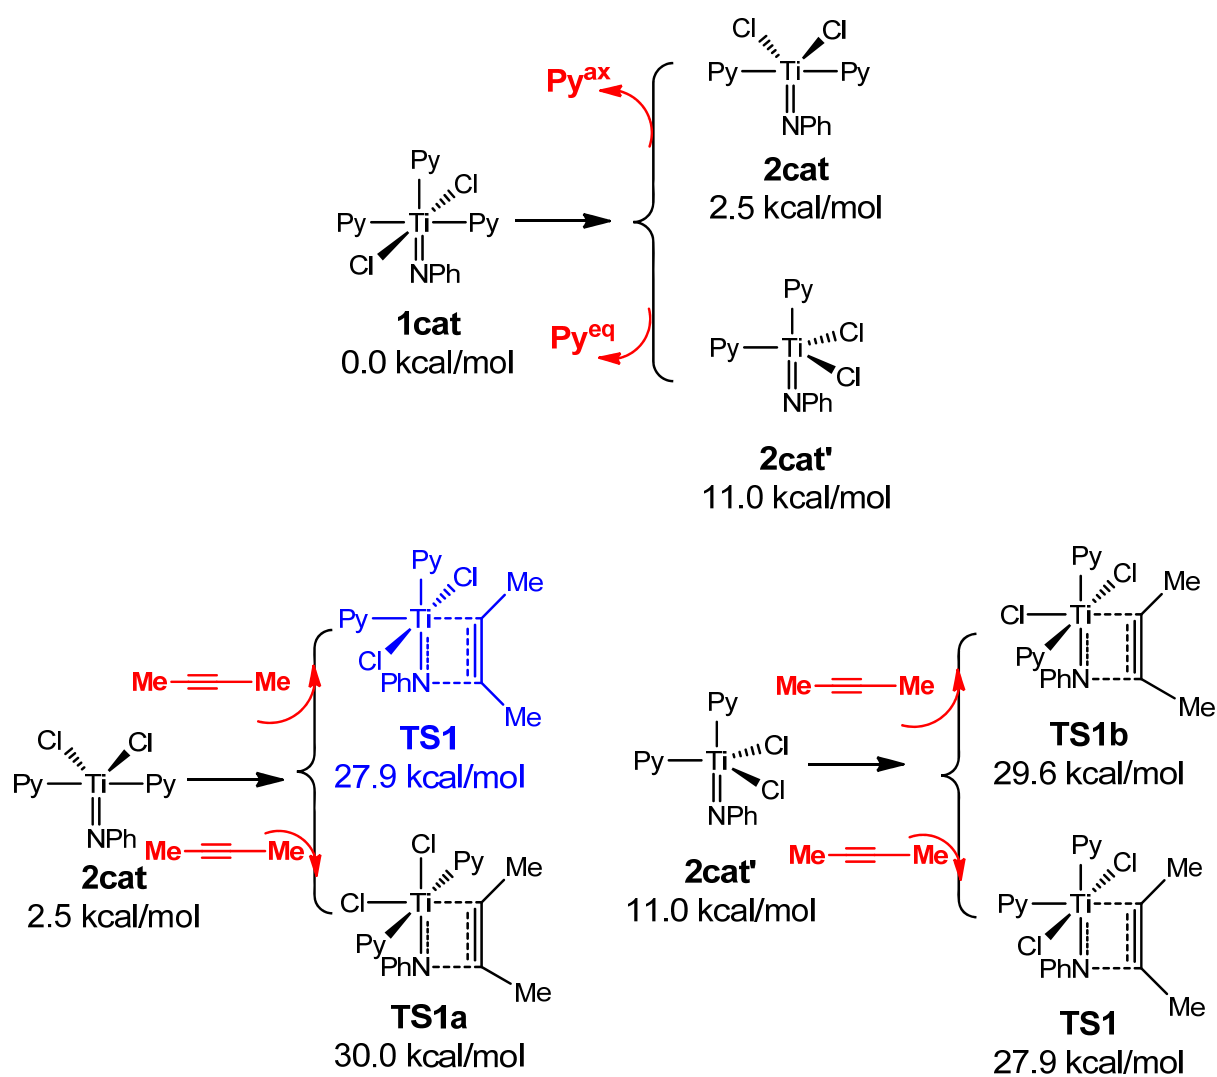

**Fig.S2.** Energetic comparisons for alkyne [2+2] addition to imido Ti=N bond of **2cat** and **2cat'**. Values are free energies relative to **1cat** and are mass balanced.

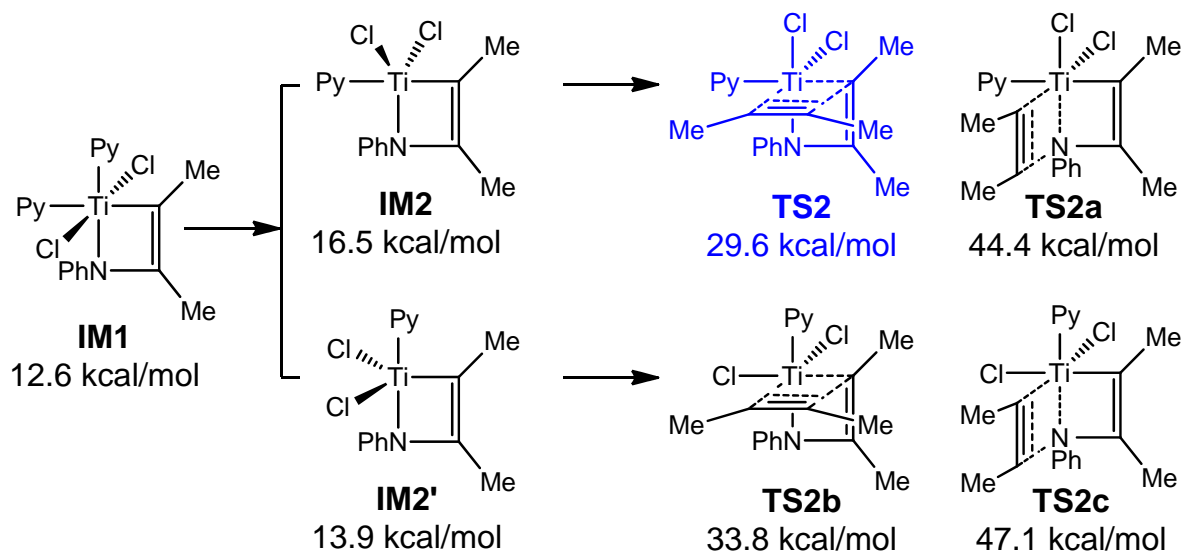

**Fig.S3.** Energetic comparisons for the insertions of alkyne into the Ti–C bond or Ti–N bond. Values are free energies relative to **1cat** and are mass balanced.

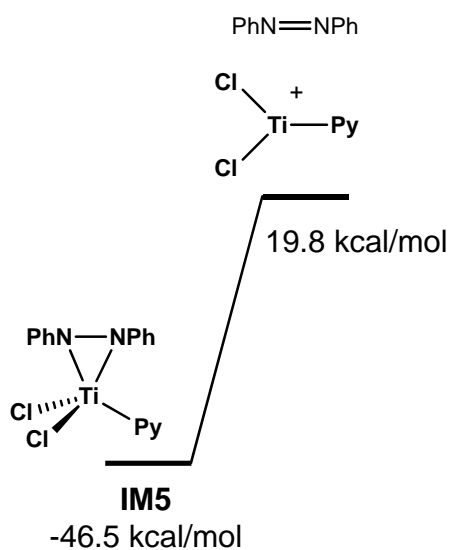

**Fig.S4.** Dissociation energy of azobenzene from **IM5**. Values are free energies relative to **1cat** and are mass balanced.

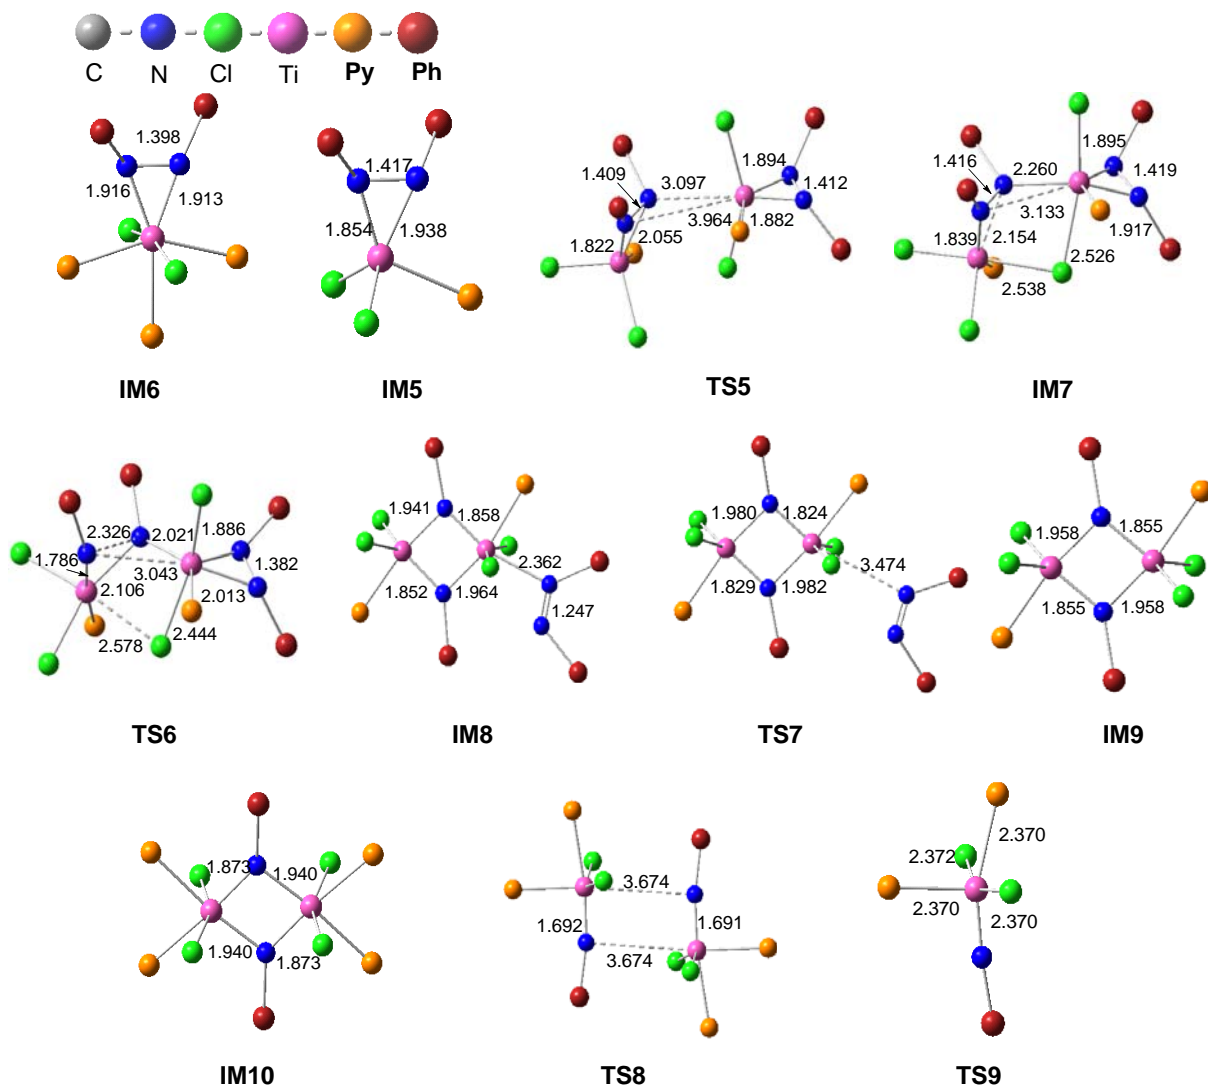

**Fig.S5.** B3LYP/6-31G(d,p) optimized structure of key stationary points involved in Fig.2, along with key bond lengths in angstroms. Trivial hydrogen atoms are omitted for clarity.

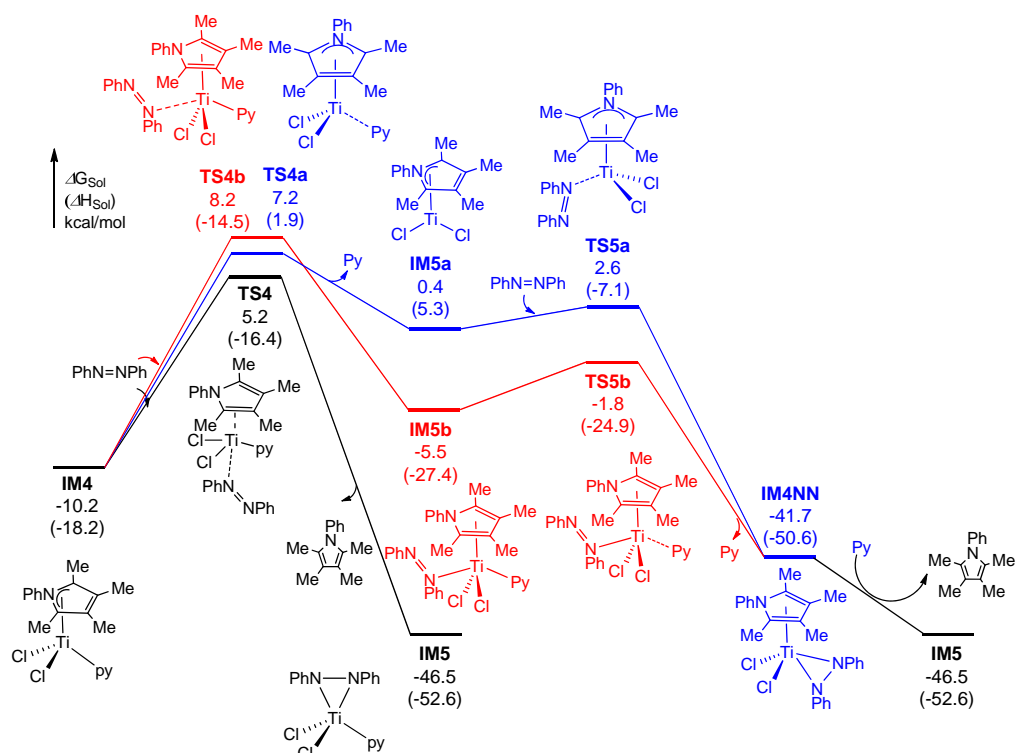

**Fig.S6A.** When PhNNPh is used to attack **IM4**, the alternative pathways to our reported **IM4**→**TS4**→**IM5**. Values are free energies relative to **1cat** and are mass balanced. Key optimized structures are displayed in Fig.S5B.

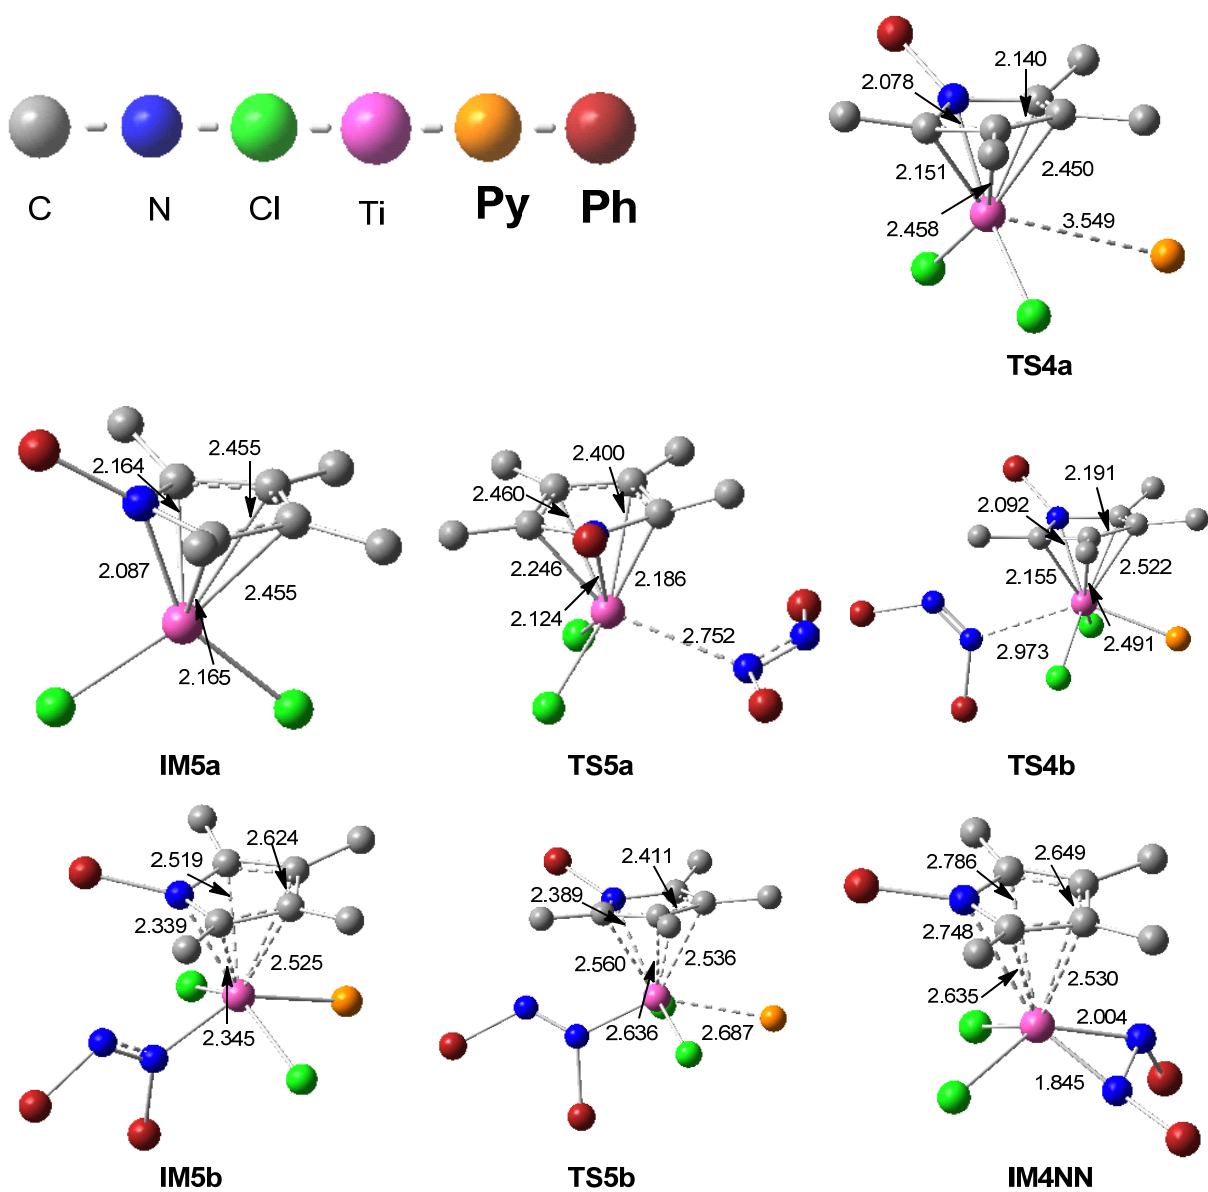

**Fig.S6B.** B3LYP/6-31G(d,p) optimized structure of key stationary points involved in Fig.S6A, along with key bond lengths in angstroms. Trivial hydrogen atoms are omitted for clarity.

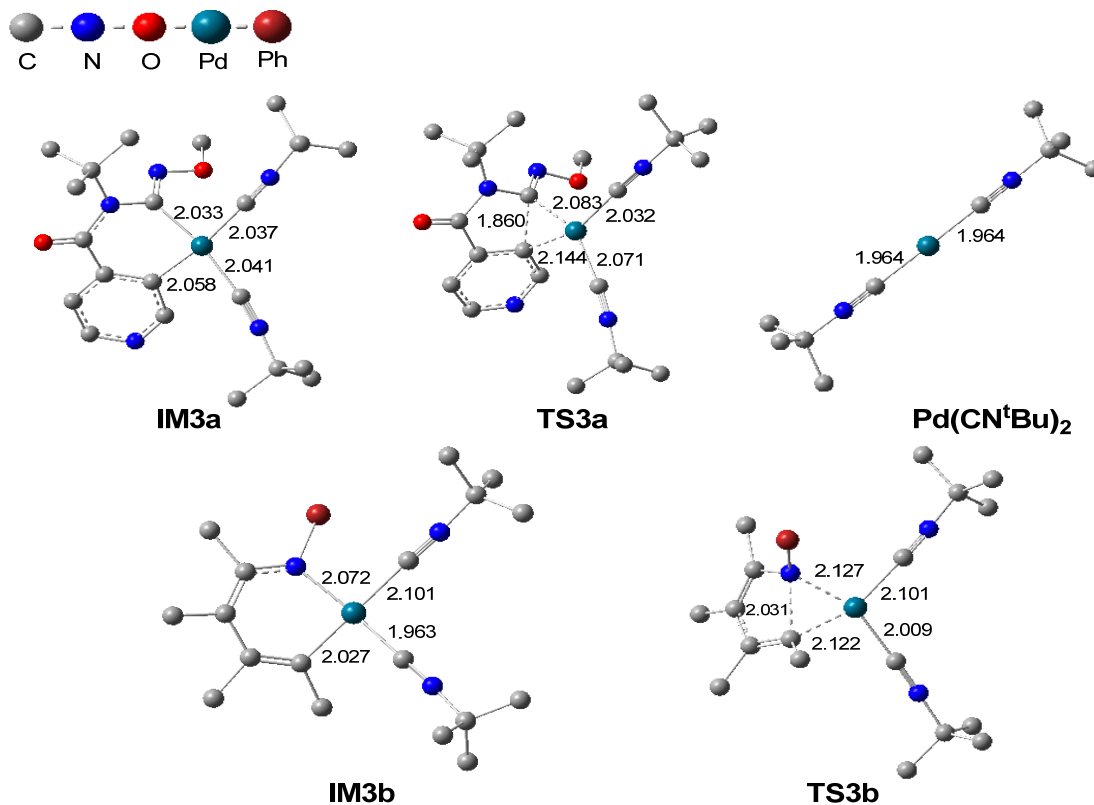

**Fig.S7.** B3LYP/6-31G(d,p) optimized structure of key stationary points in Fig.3B and 3C, along with key bond lengths in angstroms. Trivial hydrogen atoms are omitted for clarity.

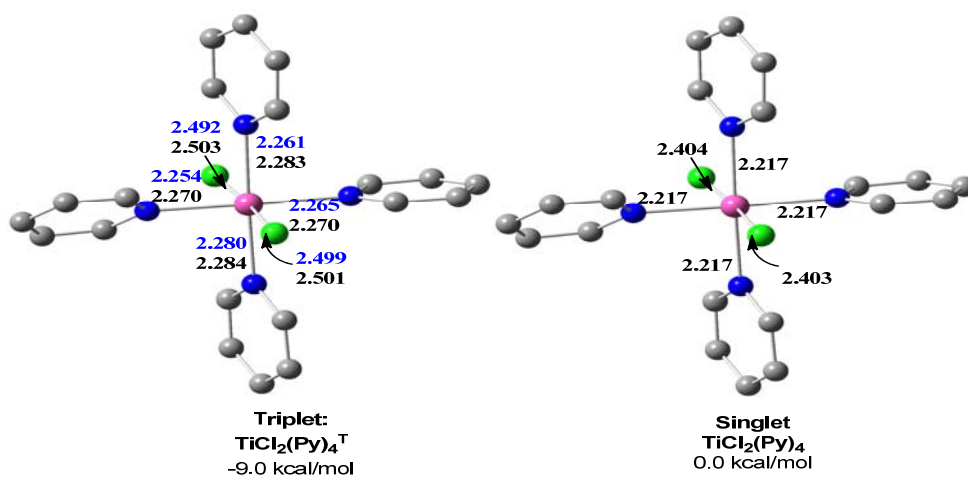

**Fig.S8.** B3LYP/6-31G\*\* optimized structures and M06-L(PCM)/6-311++G(d,p) energetic results for the experimentally well-characterized Ti(II) complex ( $\text{TiCl}_2(\text{Py})_4$ ). Blue values are X-ray parameters.



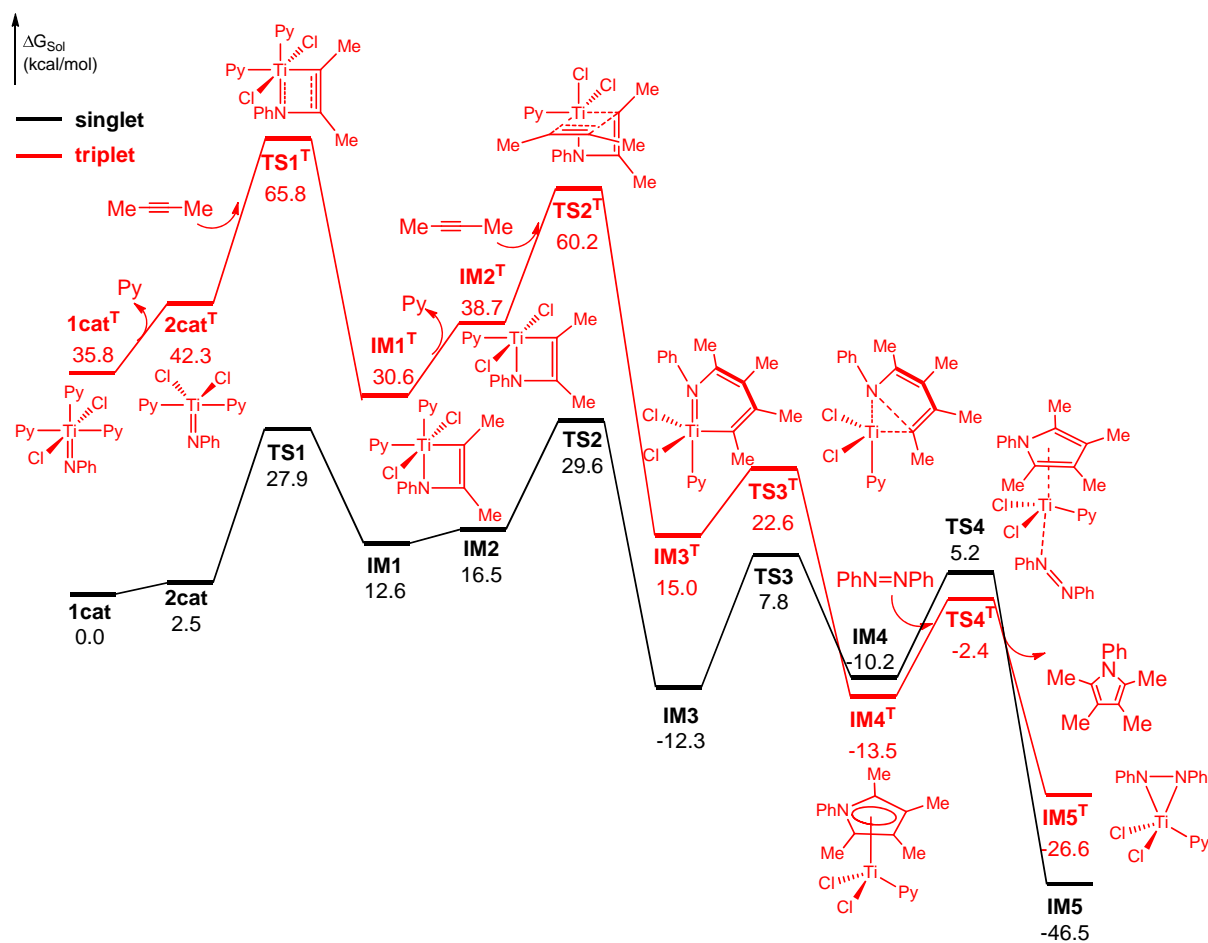

**Fig.S9A.** Free energy profiles of singlet and triplet for the first three stages (stage I~stage III in Scheme 1B). Values are free energies relative to **1cat** and are mass balanced. Optimized structures of singlet are displayed in Fig.S1. Optimized structures of triplet are displayed in Fig.S9B.

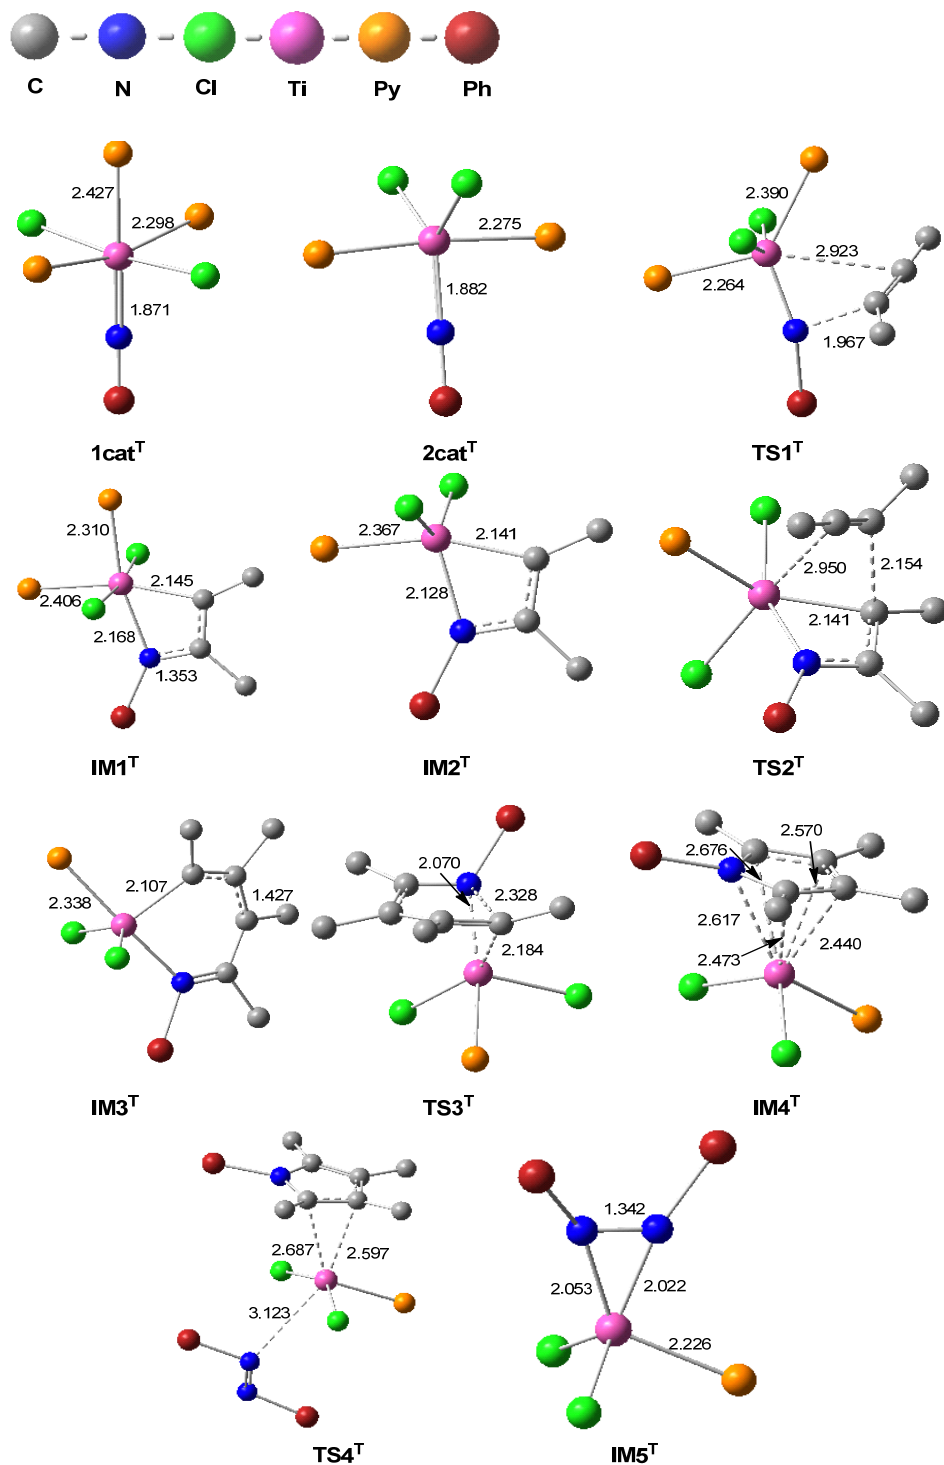

**Fig.S9B.** B3LYP/6-31G(d,p) optimized structures of stationary points (triplet) involved in Fig.S9A, along with key bond lengths in angstroms. Trivial hydrogen atoms are omitted for clarity.

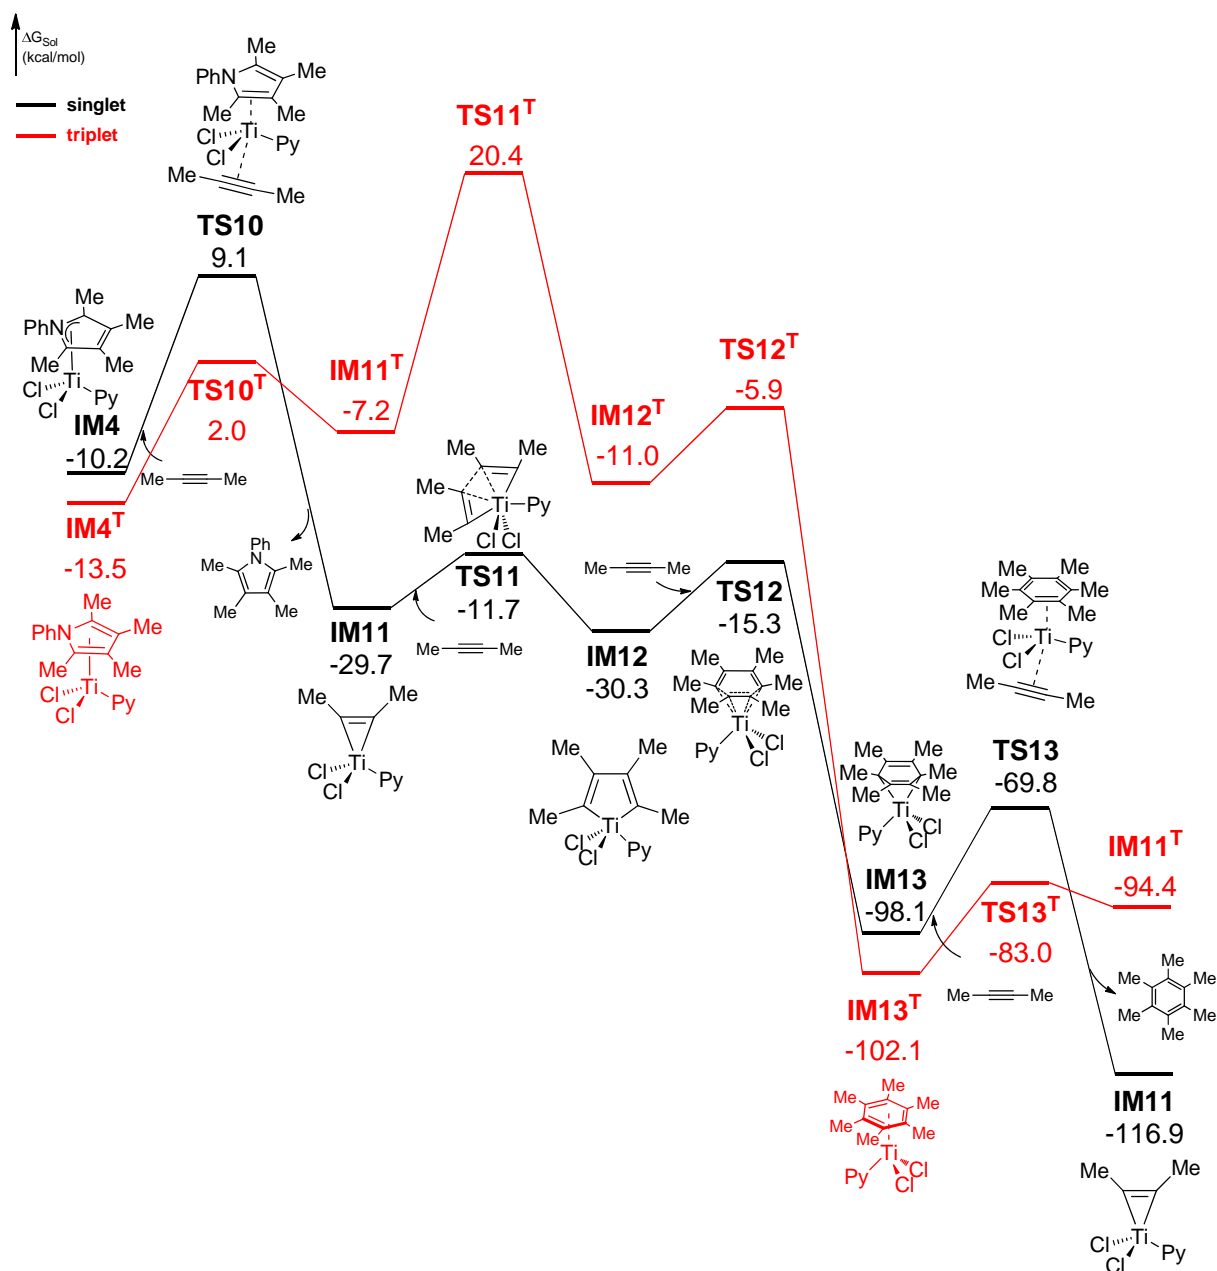

**Fig.S10A.** Free energy profiles of singlet and triplet for the alkyne trimerization. Values are free energies relative to **1cat** and are mass balanced. Optimized structures of stationary points are displayed in Fig.S10B.

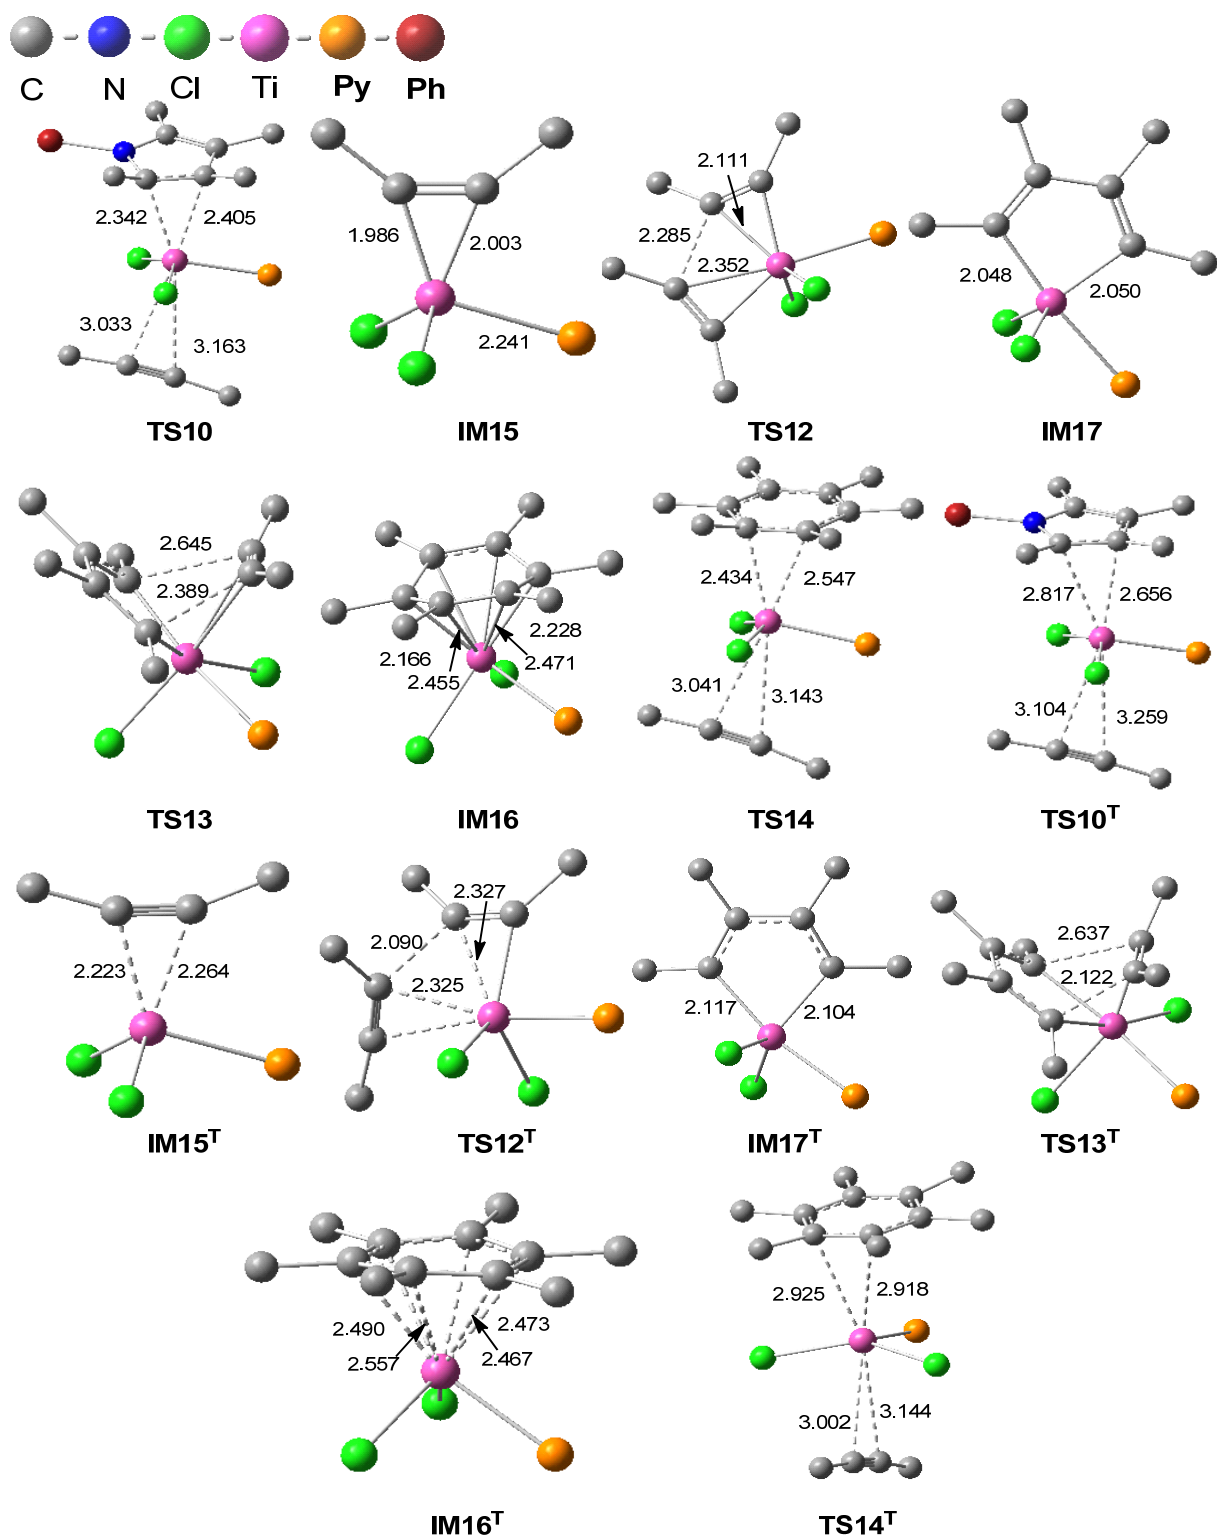

**Fig.S10B.** B3LYP/6-31G(d,p) optimized structures of stationary points involved in Fig.S10A, along with key bond lengths in angstroms. Trivial hydrogen atoms are omitted for clarity.

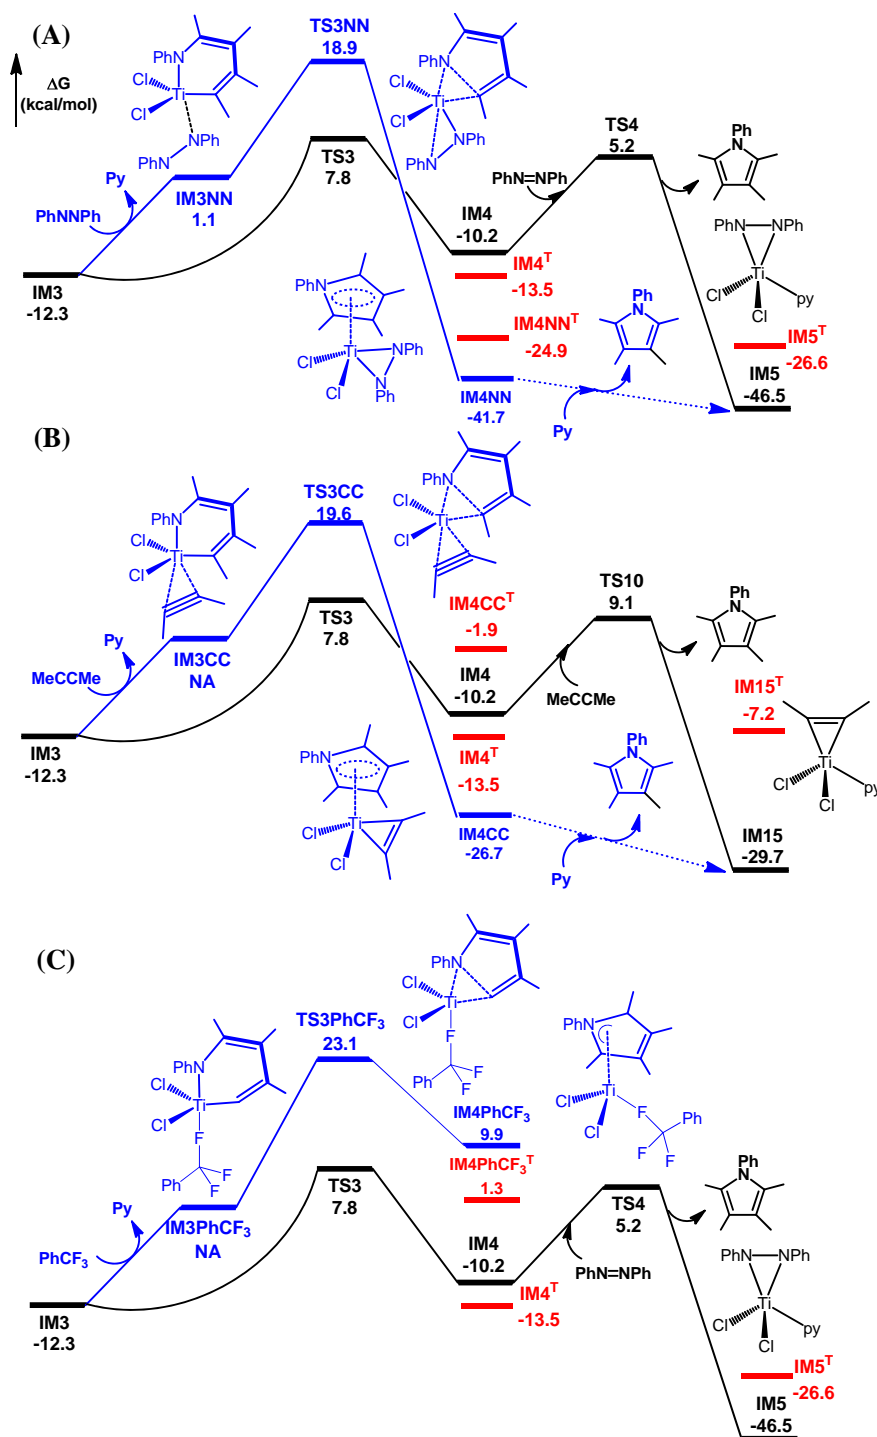

**Fig.S11A.** Free energy profile for the C–N bond formation pathways (the blue one) involving azobenzene, alkyne and PhCF<sub>3</sub> as a ligand. Optimized structures of stationary points are displayed in Fig.S11B.

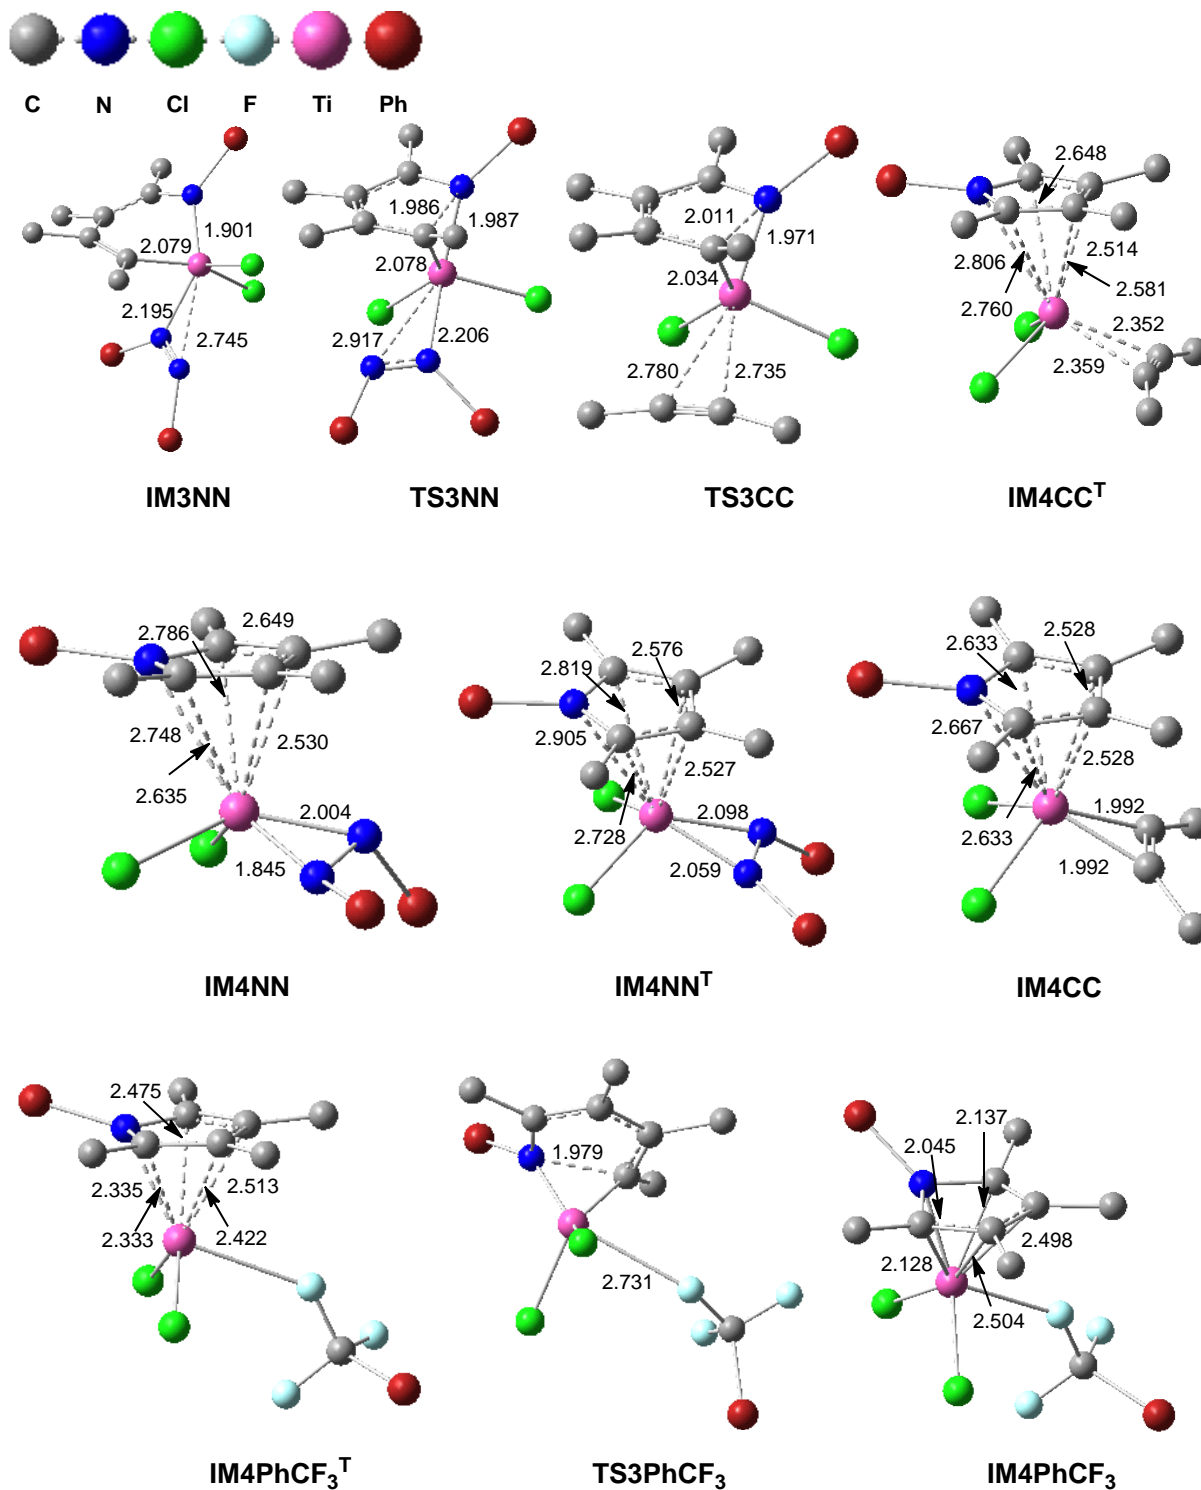

**Fig.S11B.** B3LYP/6-31G(d,p) optimized structures of stationary points involved in Fig. S11A, along with key bond lengths in angstroms. Trivial hydrogen atoms are omitted for clarity.

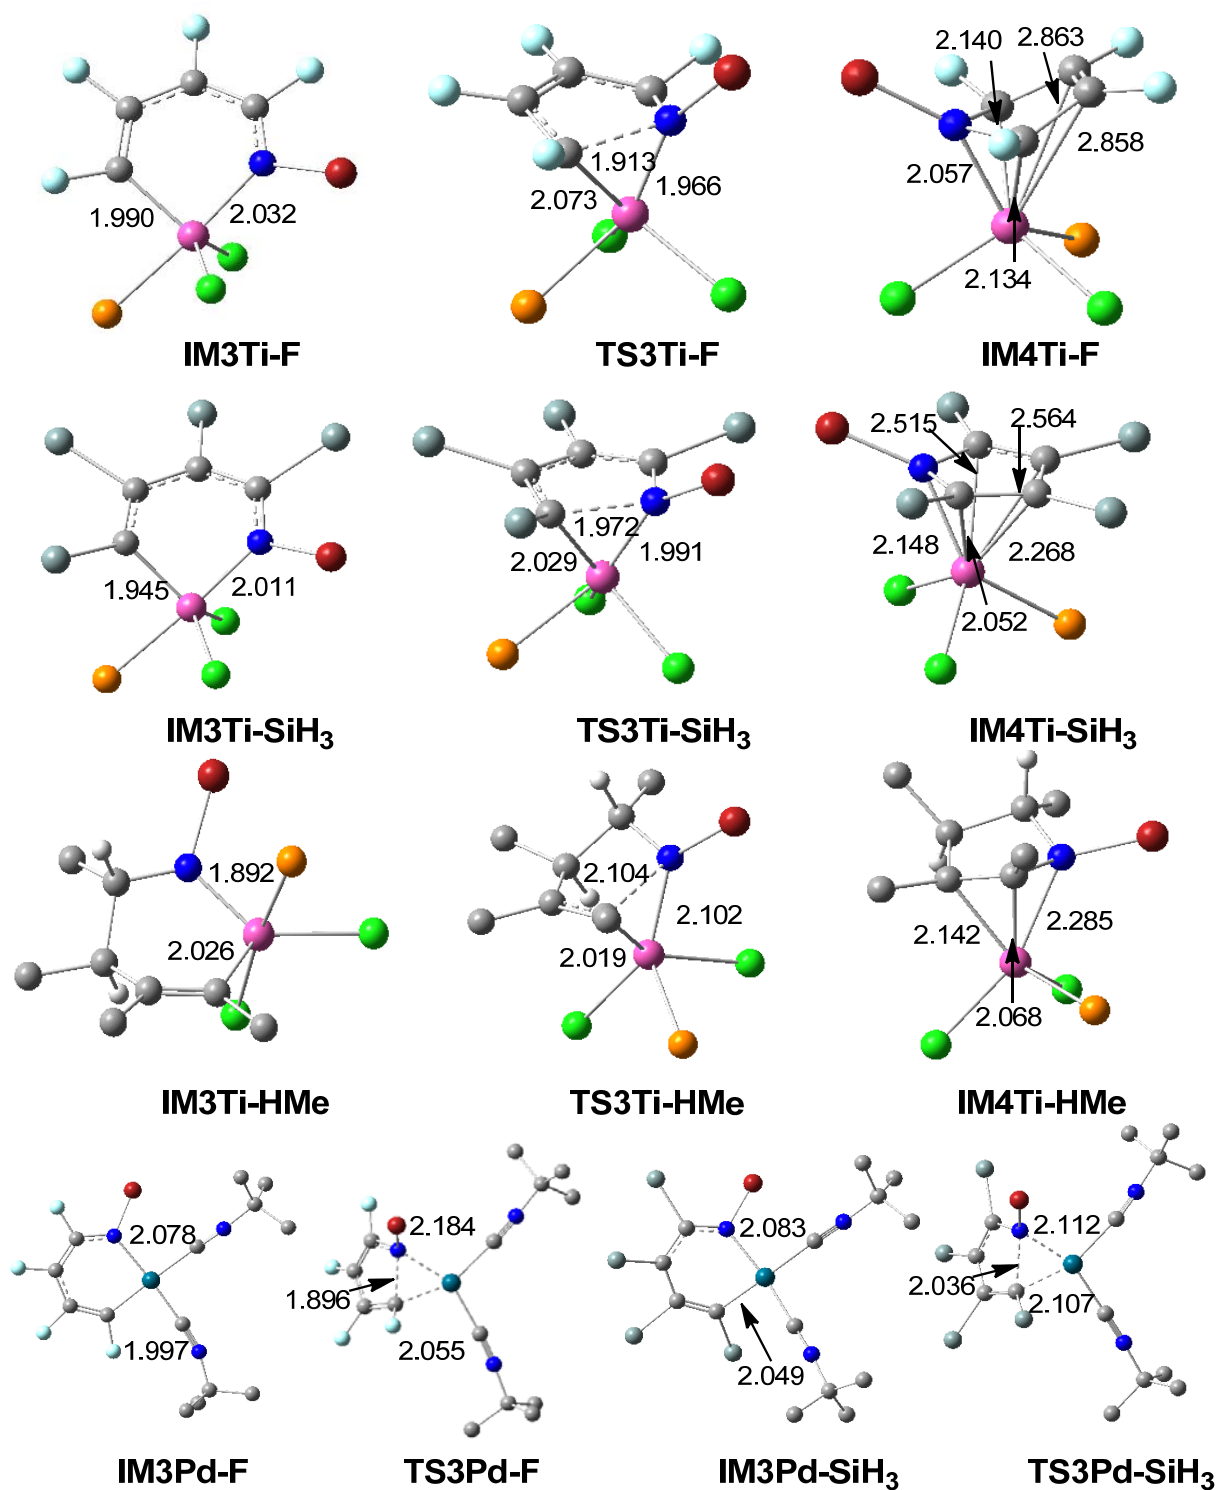

**Fig.S12.** B3LYP/6-31G(d,p) optimized structures of stationary points involved in Scheme 4, along with key bond lengths in angstroms. Trivial hydrogen atoms are omitted for clarity.

**Table S1.** Different levels of DFT calculations for **IM4<sup>T</sup>** and **IM4**. The energies were refined by single-point energy calculations with solvent effects accounted by PCM solvent model in the experimentally used solvent (PhCF<sub>3</sub>).

|                                           | M06-L/6-311++G**<br>//B3LYP/6-31G** | B3LYP/6-311++G**<br>//B3LYP/6-31G** | M06/6-311++G**<br>//M06/6-31G** | BP86/6-311++G**<br>//BP86/6-31G** | wB97XD/6-311++G**<br>//wB97XD/6-31G** |
|-------------------------------------------|-------------------------------------|-------------------------------------|---------------------------------|-----------------------------------|---------------------------------------|
| G(IM4 <sup>T</sup> )-G(IM4)<br>(kcal/mol) | -3.3                                | -11.4                               | -4.8                            | -3.9                              | -10.4                                 |

**Table S2:** Thermodynamics cost (in kcal/mol) for displacing Py ligand with PhNNPh, MeCCMe, and PhCF<sub>3</sub>. NA means that optimized structure could not located.

| Entry 1                                                                                                                                                                                                                                                                                                                                                                                                                                                                                                                                                          | Entry 2                                                                                                                                                                                                                                                                                                                                                         | Entry 3                                                                                                                                                                                                                                                                                                                                                                 | Entry 4                                                                                                                                                                                                                                                                                                                            |
|------------------------------------------------------------------------------------------------------------------------------------------------------------------------------------------------------------------------------------------------------------------------------------------------------------------------------------------------------------------------------------------------------------------------------------------------------------------------------------------------------------------------------------------------------------------|-----------------------------------------------------------------------------------------------------------------------------------------------------------------------------------------------------------------------------------------------------------------------------------------------------------------------------------------------------------------|-------------------------------------------------------------------------------------------------------------------------------------------------------------------------------------------------------------------------------------------------------------------------------------------------------------------------------------------------------------------------|------------------------------------------------------------------------------------------------------------------------------------------------------------------------------------------------------------------------------------------------------------------------------------------------------------------------------------|
| 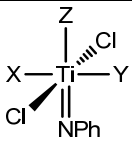 <p><b>1cat</b></p>                                                                                                                                                                                                                                                                                                                                                                                                                                                            |  <p><b>2cat</b></p>                                                                                                                                                                                                                                                           |  <p><b>TS1</b></p>                                                                                                                                                                                                                                                                   |  <p><b>IM1</b></p>                                                                                                                                                                                                                             |
| <p>X=Y=Z=Py <math>\Delta G_{\text{Sol}}=0.0</math><br/> X=Y=Py Z=PhNNPh <math>\Delta G_{\text{Sol}}=13.2</math><br/> X=Z=Py Y=PhNNPh <math>\Delta G_{\text{Sol}}=15.2</math><br/> Z=Py X=Y=PhNNPh <math>\Delta G_{\text{Sol}}=29.6</math><br/> X=Py Y=Z=PhNNPh NA<br/> X=Y=Z=PhNNPh NA<br/> X=Y=Py Z=MeCCMe NA<br/> X=Z=Py Y=MeCCMe <math>\Delta G_{\text{Sol}}=13.5</math><br/> Z=Py X=Y=MeCCMe <math>\Delta G_{\text{Sol}}=26.6</math><br/> X=Py Y=Z=MeCCMe NA<br/> X=Y=Z=MeCCMe NA<br/> X=Z=Py Y=PhCF<sub>3</sub> <math>\Delta G_{\text{Sol}}=16.9</math></p> | <p>X=Y=Py <math>\Delta G_{\text{Sol}}=2.5</math><br/> X=Py Y=PhNNPh <math>\Delta G_{\text{Sol}}=17.1</math><br/> X=Y=PhNNPh <math>\Delta G_{\text{Sol}}=31.6</math><br/> X=Py Y=MeCCMe <math>\Delta G_{\text{Sol}}=15.0</math><br/> X=Y=MeCCMe <math>\Delta G_{\text{Sol}}=28.2</math><br/> X=Py Y=PhCF<sub>3</sub> <math>\Delta G_{\text{Sol}}=21.2</math></p> | <p>X=Y=Py <math>\Delta G_{\text{Sol}}=27.9</math><br/> X=PhNNPh Y=Py <math>\Delta G_{\text{Sol}}=39.7</math><br/> X=Py Y=PhNNPh <math>\Delta G_{\text{Sol}}=41.7</math><br/> X=Y=PhNNPh <math>\Delta G_{\text{Sol}}=56.6</math><br/> X=MeCCMe Y=Py NA<br/> X=Py Y=MeCCMe NA<br/> X=Y=MeCCMe NA<br/> X=PhCF<sub>3</sub> Y=Py <math>\Delta G_{\text{Sol}}=39.3</math></p> | <p>X=Y=Py <math>\Delta G_{\text{Sol}}=12.6</math><br/> X=Py Y=PhNNPh <math>\Delta G_{\text{Sol}}=20.9</math><br/> X=PhNNPh Y=Py <math>\Delta G_{\text{Sol}}=21.0</math><br/> X=Y=PhNNPh <math>\Delta G_{\text{Sol}}=34.9</math><br/> X=MeCCMe Y=Py NA<br/> X=Py Y=MeCCMe NA<br/> X=Y=MeCCMe NA<br/> X=Py Y=PhCF<sub>3</sub> NA</p> |
| Entry 5                                                                                                                                                                                                                                                                                                                                                                                                                                                                                                                                                          | Entry 6                                                                                                                                                                                                                                                                                                                                                         | Entry 7                                                                                                                                                                                                                                                                                                                                                                 | Entry 8                                                                                                                                                                                                                                                                                                                            |
|  <p><b>IM2</b></p>                                                                                                                                                                                                                                                                                                                                                                                                                                                            |  <p><b>TS2</b></p>                                                                                                                                                                                                                                                           |  <p><b>IM3</b></p>                                                                                                                                                                                                                                                                  |  <p><b>TS3</b></p>                                                                                                                                                                                                                            |
| <p>X=Py <math>\Delta G_{\text{Sol}}=16.5</math><br/> X=PhNNPh <math>\Delta G_{\text{Sol}}=25.0</math><br/> X=MeCCMe NA<br/> X=PhCF<sub>3</sub> <math>\Delta G_{\text{Sol}}=27.5</math></p>                                                                                                                                                                                                                                                                                                                                                                       | <p>X=Py <math>\Delta G_{\text{Sol}}=29.6</math><br/> X=PhNNPh <math>\Delta G_{\text{Sol}}=44.2</math><br/> X=MeCCMe NA<br/> X=PhCF<sub>3</sub> NA</p>                                                                                                                                                                                                           | <p>X=Py <math>\Delta G_{\text{Sol}}=12.3</math><br/> X=PhNNPh <math>\Delta G_{\text{Sol}}=1.1</math><br/> X=MeCCMe NA<br/> X=PhCF<sub>3</sub> NA</p>                                                                                                                                                                                                                    | <p>X=Py <math>\Delta G_{\text{Sol}}=7.8</math><br/> X=PhNNPh <math>\Delta G_{\text{Sol}}=18.9</math><br/> X=MeCCMe <math>\Delta G_{\text{Sol}}=19.6</math><br/> X=PhCF<sub>3</sub> <math>\Delta G_{\text{Sol}}=23.1</math></p>                                                                                                     |
| Entry 9                                                                                                                                                                                                                                                                                                                                                                                                                                                                                                                                                          |                                                                                                                                                                                                                                                                                                                                                                 |                                                                                                                                                                                                                                                                                                                                                                         |                                                                                                                                                                                                                                                                                                                                    |



|                                                                                                                                                                                                                                                                                                                    |                                                                                                                                                                                                                                                                                                                                                                       |
|--------------------------------------------------------------------------------------------------------------------------------------------------------------------------------------------------------------------------------------------------------------------------------------------------------------------|-----------------------------------------------------------------------------------------------------------------------------------------------------------------------------------------------------------------------------------------------------------------------------------------------------------------------------------------------------------------------|
| 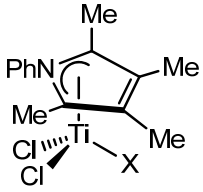 <p style="text-align: center;"><b>IM4</b></p>                                                                                                                                                                                    | <p><b>Note that</b> only these complexes in case 1~3 (entry 9) are stable, but:</p> <p>the complex in case 1 will proceed to <b>IM5</b> in Figure 3 or 5</p> <p>The complex in case 2 will proceed to <b>IM5</b> in Figure 3 or 5 after a Py replaces pyrrole.</p> <p>The complex in case 3 will proceed to <b>IM11</b> in Figure 5. after a Py replaces pyrrole.</p> |
| <p><b>X=Py</b>      <math>\Delta G_{\text{Sol}} = -10.2</math> (Case 1)</p> <p><b>X=PhNNPh</b>   <math>\Delta G_{\text{Sol}} = -41.7</math> (case 2)</p> <p><b>X=MeCCMe</b>   <math>\Delta G_{\text{Sol}} = -26.7</math> (case 3)</p> <p><b>X=PhCF<sub>3</sub></b>    <math>\Delta G_{\text{Sol}} = 9.9</math></p> | <p>Thus, the formations of these complexes will not affect the pathways reported in the main text.</p>                                                                                                                                                                                                                                                                |

## SI2: Detailed results for spin-orbital coupling calculations

### SI2a. Structure of MECPI

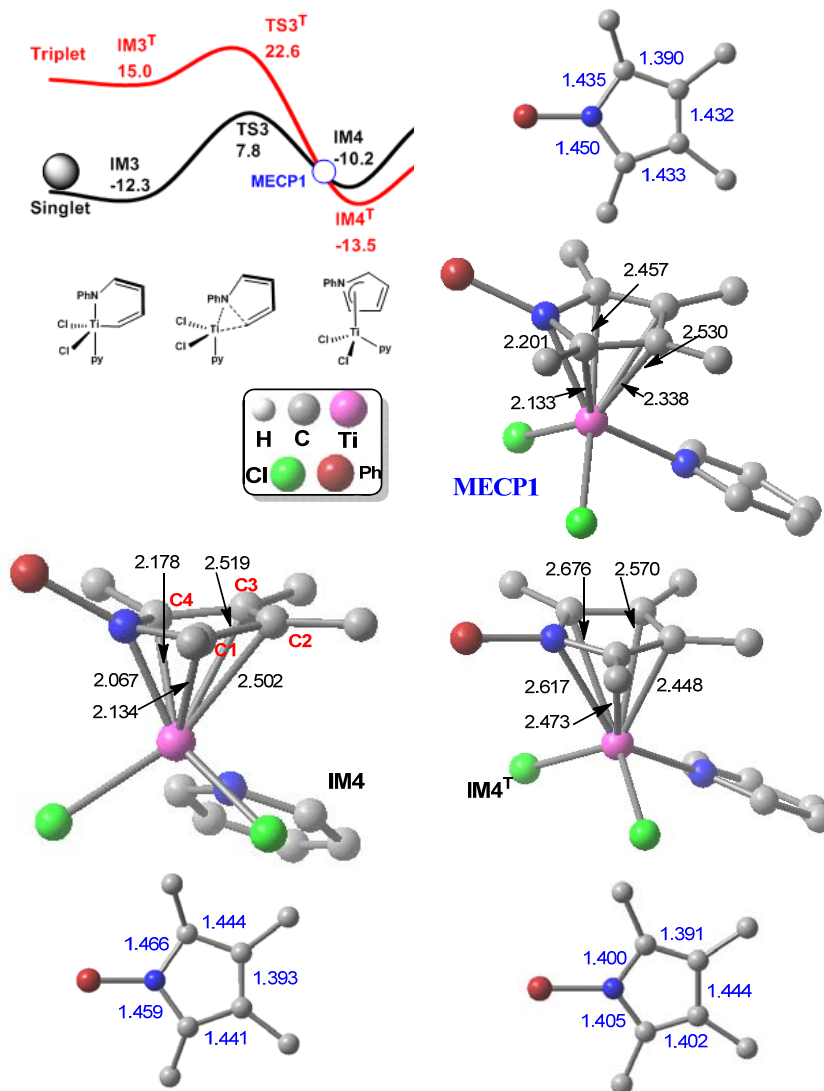

### SI2b. Technical details for for spin-orbit coupling (SOC) calculations

Due to the relative large system (46 atoms in total) for high level wavefunction-based computations, the SOC value is calculated at MRCI/CASSCF(2,5)/6-31G(d) level<sup>1-3</sup> using full Breit-Pauli operator.

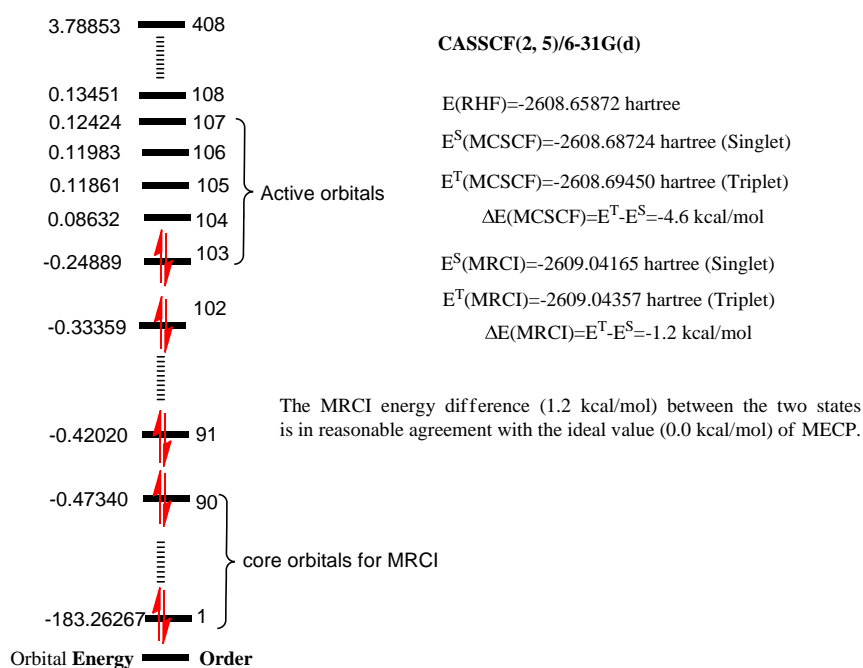

### SI2c. Spin-orbit coupling matrix (in cm<sup>-1</sup>) using full Breit-Pauli operator

| State | Sym | Spin  | / Nr. | 1                | 2                | 3              | 4                |
|-------|-----|-------|-------|------------------|------------------|----------------|------------------|
| 1     | 1   | 0 0>  |       | 422.502<br>0.000 | -28.565<br>0.000 | 0.000<br>2.016 | 0.000<br>-25.863 |
| 1     | 1   | 1 1>+ |       | -28.565<br>0.000 | 0.000<br>0.000   | 0.000<br>0.000 | 0.000<br>-0.000  |
| 1     | 1   | 1 0>  |       | 0.000<br>-2.016  | 0.000<br>0.000   | 0.000<br>0.000 | 0.000<br>-0.000  |
| 1     | 1   | 1 1>- |       | 0.000<br>25.863  | 0.000<br>-0.000  | 0.000<br>0.000 | 0.000<br>0.000   |

$$\text{RMS SOC} = \text{SQRT}[(-28.565)^2 + 2.016^2 + 25.863^2] = 38.6 \text{ cm}^{-1}$$

**SI2d: References**

1 References for CASSCF (a) H.-J. Werner and P. J. Knowles, *J. Chem. Phys.* 1985, **82**, 5053;(b) P. J. Knowles and H.-J. Werner, *Chem. Phys. Lett.* 1985,**115**, 259; (c) H.-J. Werner and W. Meyer, *J. Chem. Phys.* 1980, **73**, 2342; (d) H.-J. Werner and W. Meyer, *J. Chem. Phys.* 1981, **74**, 5794;(e) H.-J. Werner, *Adv. Chem. Phys.* LXIX, 1987, 1.

2 References for MRCI (Multireference internally contracted CI) (a) H.-J. Werner and P. J. Knowles, *J. Chem. Phys.* 1988, **89**, 5803; (b) P. J. Knowles and H.-J. Werner, *Chem. Phys. Lett.* 1988, **145**, 514; (c) H.-J. Werner and E.A. Reinsch, *J. Chem. Phys.* 1982, **76**, 3144; (d) H.-J. Werner, *Adv. Chem. Phys.* LXIX, 1987, 1.

3 References for spin-orbit coupling calculations: A. Berning, M. Schweizer, H.-J. Werner, P. J. Knowles and P. Palmieri, *Mol. Phys.* 2000, **98**, 1823.

**SI3: Cartesian Coordinates in Å, SCF Energies and Free Energies (in a.u.) at 298.15 K and 1 atm for the Optimized Structures [BS1=6-31G(d,p), BS2=6-311++G(d,p)]**

|                                        |           |           |           |   |           |           |           |
|----------------------------------------|-----------|-----------|-----------|---|-----------|-----------|-----------|
| <b>MeCCMe</b>                          |           |           |           | H | -1.607757 | -1.958080 | -0.000032 |
| B3LYP/BS1 SCF energy: -155.987341 a.u. |           |           |           | H | -4.079673 | -2.309876 | -0.000156 |
| M06-L/BS2 SCF energy in solution:      |           |           |           | H | -4.680939 | 1.950856  | -0.000084 |
| -155.999089 a.u.                       |           |           |           | H | -5.609646 | -0.354535 | -0.000156 |
| M06-L/BS2 Free energy in solution:     |           |           |           | C | 1.768039  | -0.184809 | 0.000083  |
| -155.941921 a.u.                       |           |           |           | C | 4.534505  | 0.200704  | -0.000111 |
|                                        |           |           |           | C | 2.633534  | -1.286502 | 0.000051  |
| C                                      | 0.000000  | 0.000000  | 0.604691  | C | 2.293557  | 1.118939  | -0.000016 |
| C                                      | 0.000000  | 0.000000  | -0.604691 | C | 3.670748  | 1.303512  | -0.000117 |
| C                                      | 0.000000  | 0.000000  | -2.065654 | C | 4.013832  | -1.094117 | -0.000040 |
| H                                      | 0.000000  | 1.020906  | -2.464047 | H | 2.198311  | -2.280692 | 0.000143  |
| H                                      | -0.884130 | -0.510453 | -2.464047 | H | 1.607756  | 1.958080  | -0.000032 |
| H                                      | 0.884130  | -0.510453 | -2.464047 | H | 4.079673  | 2.309876  | -0.000156 |
| C                                      | 0.000000  | 0.000000  | 2.065654  | H | 4.680939  | -1.950856 | -0.000084 |
| H                                      | 0.000000  | 1.020906  | 2.464047  | H | 5.609646  | 0.354535  | -0.000156 |
| H                                      | 0.884130  | -0.510453 | 2.464047  |   |           |           |           |
| H                                      | -0.884130 | -0.510453 | 2.464047  |   |           |           |           |

**PhNNPh**

B3LYP/BS1 SCF energy: -572.777801 a.u.  
M06-L/BS2 SCF energy in solution:  
-572.826989 a.u.  
M06-L/BS2 Free energy in solution:  
-572.674458 a.u.

|   |           |           |           |
|---|-----------|-----------|-----------|
| N | -0.384637 | 0.499329  | 0.000169  |
| N | 0.384637  | -0.499330 | 0.000169  |
| C | -1.768039 | 0.184809  | 0.000083  |
| C | -4.534505 | -0.200704 | -0.000111 |
| C | -2.633534 | 1.286502  | 0.000051  |
| C | -2.293557 | -1.118939 | -0.000016 |
| C | -3.670748 | -1.303512 | -0.000117 |
| C | -4.013832 | 1.094117  | -0.000040 |
| H | -2.198311 | 2.280692  | 0.000143  |

**Pyridine (Py)**

B3LYP/BS1 SCF energy: -248.292597 a.u.  
M06-L/BS2 SCF energy in solution:  
-248.314061 a.u.  
M06-L/BS2 Free energy in solution:  
-248.252587 a.u.

|   |           |           |          |
|---|-----------|-----------|----------|
| H | -0.004868 | 2.440327  | 0.000000 |
| C | 0.000000  | 1.351495  | 0.000000 |
| C | -0.071489 | -1.372626 | 0.000000 |
| C | 1.209075  | 0.653811  | 0.000000 |
| C | 1.171338  | -0.740186 | 0.000000 |
| C | -1.220652 | -0.580166 | 0.000000 |
| H | 2.151838  | 1.192119  | 0.000000 |
| H | 2.089529  | -1.320411 | 0.000000 |
| H | -2.206129 | -1.043211 | 0.000000 |
| H | -0.152975 | -2.455184 | 0.000000 |
| N | -1.201003 | 0.758914  | 0.000000 |

**Pyrrole**

B3LYP/BS1 SCF energy: -598.514016 a.u.  
M06-L/BS2 SCF energy in solution:  
-598.556366 a.u.  
M06-L/BS2 Free energy in solution:  
-598.325246 a.u.

**1cat**

B3LYP/BS1 SCF energy: -2801.368573 a.u.  
M06-L/BS2 SCF energy in solution:  
-2801.524984 a.u.  
M06-L/BS2 Free energy in solution:  
-2801.220043 a.u.

|   |           |           |           |    |           |           |           |
|---|-----------|-----------|-----------|----|-----------|-----------|-----------|
|   |           |           |           | Ti | 0.021905  | 0.000082  | 0.000029  |
| C | 1.260430  | 0.000058  | -0.000053 | N  | -0.193307 | -2.256363 | 0.055178  |
| C | 4.059156  | 0.000056  | 0.000187  | C  | -0.299353 | -5.044581 | 0.084534  |
| C | 1.963843  | 0.537727  | 1.084093  | C  | -0.949865 | -2.907165 | 0.957798  |
| C | 1.964043  | -0.537644 | -1.084092 | C  | 0.516824  | -2.982637 | -0.830072 |
| C | 3.358824  | -0.542886 | -1.078556 | C  | 0.491053  | -4.372886 | -0.846980 |
| C | 3.358660  | 0.542957  | 1.078801  | C  | -1.032850 | -4.295840 | 1.002251  |
| H | 1.409910  | 0.938439  | 1.926885  | H  | -1.479770 | -2.282320 | 1.666980  |
| H | 1.410204  | -0.938366 | -1.926941 | H  | 1.107616  | -2.415475 | -1.539070 |
| H | 3.898144  | -0.962827 | -1.922502 | H  | 1.084106  | -4.910259 | -1.578740 |
| H | 3.897801  | 0.962894  | 1.922864  | H  | -1.658143 | -4.771251 | 1.750035  |
| H | 5.145028  | 0.000037  | 0.000262  | H  | -0.339323 | -6.129694 | 0.096830  |
| C | -2.284561 | 0.714437  | -0.072880 | N  | -0.191033 | 2.256609  | -0.055341 |
| N | -0.165256 | 0.000034  | -0.000187 | C  | -0.294784 | 5.044921  | -0.084725 |
| C | -0.970435 | 1.132980  | -0.111864 | C  | 0.520178  | 2.982318  | 0.829502  |
| C | -0.386018 | 2.499075  | -0.287985 | C  | -0.947515 | 2.908030  | -0.957592 |
| H | -1.178491 | 3.215466  | -0.515104 | C  | -1.029378 | 4.296762  | -1.002037 |
| H | 0.336584  | 2.532293  | -1.112046 | C  | 0.495574  | 4.372595  | 0.846371  |
| H | 0.134944  | 2.861298  | 0.607062  | H  | 1.110895  | 2.414697  | 1.538188  |
| C | -3.515036 | 1.568333  | -0.167002 | H  | -1.478291 | 2.283610  | -1.666495 |
| H | -3.270280 | 2.625050  | -0.305784 | H  | -1.654663 | 4.772675  | -1.749510 |
| H | -4.131405 | 1.495521  | 0.738502  | H  | 1.089488  | 4.909493  | 1.577779  |
| H | -4.154679 | 1.268955  | -1.007106 | H  | -0.333850 | 6.130066  | -0.097050 |
| C | -0.970368 | -1.133007 | 0.111730  | N  | -2.563198 | 0.001113  | -0.000008 |
| C | -2.284502 | -0.714500 | 0.072999  | C  | -5.366450 | 0.001272  | 0.000124  |
| C | -0.385726 | -2.499031 | 0.287527  | C  | -3.260602 | 0.594531  | 0.986186  |
| H | 0.337575  | -2.532100 | 1.110973  | C  | -3.260778 | -0.592233 | -0.986136 |
| H | 0.134497  | -2.861360 | -0.607914 | C  | -4.653416 | -0.623058 | -1.021307 |
| H | -1.177942 | -3.215466 | 0.515445  | C  | -4.653240 | 0.625521  | 1.021485  |
| C | -3.514863 | -1.568528 | 0.167305  | H  | -2.666894 | 1.036691  | 1.778669  |
| H | -4.154435 | -1.269219 | 1.007491  | H  | -2.667194 | -1.034437 | -1.778693 |
| H | -3.269954 | -2.625216 | 0.306045  | H  | -5.159525 | -1.123322 | -1.840308 |
| H | -4.131395 | -1.495811 | -0.738102 | H  | -5.159209 | 1.125853  | 1.840529  |
|   |           |           |           | H  | -6.452658 | 0.001325  | 0.000182  |

|    |           |           |           |   |           |           |           |
|----|-----------|-----------|-----------|---|-----------|-----------|-----------|
| N  | 1.708234  | -0.000697 | 0.000140  | H | -2.249239 | -2.635613 | -1.279973 |
| C  | 3.081465  | -0.001200 | 0.000168  | H | -4.725273 | -2.931440 | -1.220844 |
| C  | 5.898661  | -0.002205 | 0.000076  | H | -4.927866 | 0.630602  | 1.205897  |
| C  | 3.802334  | 0.208528  | -1.197132 | H | -6.110311 | -1.259603 | 0.045184  |
| C  | 3.802244  | -0.211439 | 1.197424  | N | 0.000013  | 0.953145  | 0.000001  |
| C  | 5.194196  | -0.211122 | 1.189344  | C | 0.000049  | 2.329869  | 0.000003  |
| C  | 5.194287  | 0.207215  | -1.189142 | C | 0.000160  | 5.148022  | 0.000006  |
| H  | 3.245789  | 0.368760  | -2.115182 | C | -0.045858 | 3.051711  | -1.213560 |
| H  | 3.245635  | -0.371247 | 2.115510  | C | 0.046027  | 3.051706  | 1.213568  |
| H  | 5.734647  | -0.374897 | 2.118058  | C | 0.046117  | 4.443776  | 1.206446  |
| H  | 5.734785  | 0.370608  | -2.117898 | C | -0.045845 | 4.443781  | -1.206436 |
| H  | 6.984742  | -0.002595 | 0.000054  | H | -0.085833 | 2.497193  | -2.146114 |
| Cl | -0.340901 | 0.087201  | 2.384382  | H | 0.085971  | 2.497182  | 2.146120  |
| Cl | -0.340656 | -0.086534 | -2.384448 | H | 0.083347  | 4.983626  | 2.148812  |

### 2cat

B3LYP/BS1 SCF energy: -2553.064327 a.u.

M06-L/BS2 SCF energy in solution:  
-2553.186039 a.u.

M06-L/BS2 Free energy in solution:  
-2552.963437 a.u.

|    |           |           |           |
|----|-----------|-----------|-----------|
| Ti | -0.000024 | -0.735994 | -0.000002 |
| N  | 2.250644  | -0.940511 | 0.102261  |
| C  | 5.028932  | -1.170447 | -0.004081 |
| C  | 2.882602  | -1.949018 | 0.730233  |
| C  | 2.991718  | -0.041704 | -0.574349 |
| C  | 4.377662  | -0.120965 | -0.650395 |
| C  | 4.265281  | -2.099988 | 0.698538  |
| H  | 2.249110  | -2.635678 | 1.280018  |
| H  | 2.442026  | 0.755614  | -1.060287 |
| H  | 4.927870  | 0.630355  | -1.205947 |
| H  | 4.725133  | -2.931609 | 1.220899  |
| H  | 6.110238  | -1.259866 | -0.045180 |
| N  | -2.250703 | -0.940413 | -0.102262 |
| C  | -5.029001 | -1.170230 | 0.004085  |
| C  | -2.991740 | -0.041558 | 0.574324  |
| C  | -2.882702 | -1.948910 | -0.730208 |
| C  | -4.265387 | -2.099823 | -0.698507 |
| C  | -4.377688 | -0.120758 | 0.650369  |
| H  | -2.442016 | 0.755752  | 1.060239  |

|    |           |           |           |
|----|-----------|-----------|-----------|
| H  | 0.000201  | 6.233874  | 0.000007  |
| Cl | -0.151913 | -1.701782 | 2.119523  |
| Cl | 0.151828  | -1.701776 | -2.119534 |

### 2cat'

B3LYP/BS1 SCF energy: -2553.042991 a.u.

M06-L/BS2 SCF energy in solution:  
-2553.171296 a.u.

M06-L/BS2 Free energy in solution:  
-2552.949921 a.u.

|    |           |           |           |
|----|-----------|-----------|-----------|
| Ti | -0.067531 | -0.869134 | -0.075704 |
| N  | -0.209716 | 1.333810  | -0.051922 |
| C  | -0.177023 | 4.119065  | -0.127020 |
| C  | -0.916917 | 2.004792  | -0.981466 |
| C  | 0.523051  | 2.036555  | 0.834913  |
| C  | 0.551945  | 3.426116  | 0.839128  |
| C  | -0.917734 | 3.393235  | -1.058370 |
| H  | -1.487834 | 1.399181  | -1.676092 |
| H  | 1.106750  | 1.453209  | 1.537720  |
| H  | 1.149793  | 3.947023  | 1.578516  |
| H  | -1.492870 | 3.887377  | -1.833402 |
| H  | -0.162812 | 5.204104  | -0.157007 |
| N  | -2.586560 | -0.495565 | 0.034856  |
| C  | -5.349240 | -0.186476 | 0.369923  |
| C  | -3.448336 | -0.861879 | -0.930017 |

|    |           |           |           |   |           |           |           |
|----|-----------|-----------|-----------|---|-----------|-----------|-----------|
| C  | -3.098301 | 0.016173  | 1.168927  | H | 0.789728  | 5.718674  | 0.106395  |
| C  | -4.462746 | 0.192612  | 1.377322  | N | 2.622343  | -0.508773 | 0.030450  |
| C  | -4.830049 | -0.726355 | -0.804128 | C | 5.421621  | -0.659302 | 0.129844  |
| H  | -2.998452 | -1.284419 | -1.822623 | C | 3.381787  | -0.071045 | -0.991438 |
| H  | -2.382018 | 0.271113  | 1.942864  | C | 3.257261  | -1.021034 | 1.101980  |
| H  | -4.816154 | 0.609310  | 2.314425  | C | 4.644012  | -1.119868 | 1.190255  |
| H  | -5.477124 | -1.045349 | -1.614273 | C | 4.774207  | -0.121594 | -0.980077 |
| H  | -6.420826 | -0.069059 | 0.501150  | H | 2.838092  | 0.314827  | -1.846183 |
| N  | 1.615525  | -0.752873 | -0.068156 | H | 2.616255  | -1.338865 | 1.917112  |
| C  | 2.975048  | -0.563058 | -0.027544 | H | 5.095496  | -1.547062 | 2.079520  |
| C  | 5.758847  | -0.147152 | 0.069599  | H | 5.330298  | 0.251930  | -1.833489 |
| C  | 3.671312  | -0.627085 | 1.200521  | H | 6.505551  | -0.717927 | 0.167882  |
| C  | 3.704572  | -0.294120 | -1.206728 | C | -2.994861 | -0.212491 | 0.038710  |
| C  | 5.079792  | -0.088074 | -1.151012 | C | -5.721983 | 0.363582  | 0.346239  |
| C  | 5.047156  | -0.420066 | 1.241159  | C | -3.564054 | -0.131382 | 1.326641  |
| H  | 3.112102  | -0.855028 | 2.102740  | C | -3.810018 | 0.000626  | -1.091622 |
| H  | 3.170614  | -0.260954 | -2.151021 | C | -5.163527 | 0.288264  | -0.932739 |
| H  | 5.627777  | 0.116198  | -2.066939 | C | -4.918842 | 0.155389  | 1.471713  |
| H  | 5.569250  | -0.476576 | 2.192612  | H | -2.920260 | -0.284734 | 2.186829  |
| H  | 6.832360  | 0.012481  | 0.106423  | H | -3.357507 | -0.058503 | -2.076651 |
| Cl | -0.499464 | -1.753144 | -2.174183 | H | -5.785352 | 0.454277  | -1.807874 |
| Cl | -0.456294 | -1.895737 | 1.963342  | H | -5.351134 | 0.220130  | 2.466220  |

### TS1

B3LYP/BS1 SCF energy: -2709.024009 a.u.  
M06-L/BS2 SCF energy in solution:  
-2709.169739 a.u.  
M06-L/BS2 Free energy in solution:  
-2708.864878 a.u.

|    |           |           |           |
|----|-----------|-----------|-----------|
| Ti | 0.092629  | -0.471199 | -0.089374 |
| N  | 0.481960  | 1.852025  | -0.012737 |
| C  | 0.703622  | 4.636603  | 0.072800  |
| C  | -0.137079 | 2.624080  | -0.925252 |
| C  | 1.206576  | 2.458874  | 0.944471  |
| C  | 1.349813  | 3.841495  | 1.017044  |
| C  | -0.057473 | 4.013578  | -0.914187 |
| H  | -0.693067 | 2.095816  | -1.690638 |
| H  | 1.661689  | 1.803371  | 1.677297  |
| H  | 1.951698  | 4.277243  | 1.807191  |
| H  | -0.581948 | 4.586658  | -1.671034 |

|    |           |           |           |
|----|-----------|-----------|-----------|
| H  | 0.789728  | 5.718674  | 0.106395  |
| N  | 2.622343  | -0.508773 | 0.030450  |
| C  | 5.421621  | -0.659302 | 0.129844  |
| C  | 3.381787  | -0.071045 | -0.991438 |
| C  | 3.257261  | -1.021034 | 1.101980  |
| C  | 4.644012  | -1.119868 | 1.190255  |
| C  | 4.774207  | -0.121594 | -0.980077 |
| H  | 2.838092  | 0.314827  | -1.846183 |
| H  | 2.616255  | -1.338865 | 1.917112  |
| H  | 5.095496  | -1.547062 | 2.079520  |
| H  | 5.330298  | 0.251930  | -1.833489 |
| H  | 6.505551  | -0.717927 | 0.167882  |
| C  | -2.994861 | -0.212491 | 0.038710  |
| C  | -5.721983 | 0.363582  | 0.346239  |
| C  | -3.564054 | -0.131382 | 1.326641  |
| C  | -3.810018 | 0.000626  | -1.091622 |
| C  | -5.163527 | 0.288264  | -0.932739 |
| C  | -4.918842 | 0.155389  | 1.471713  |
| H  | -2.920260 | -0.284734 | 2.186829  |
| H  | -3.357507 | -0.058503 | -2.076651 |
| H  | -5.785352 | 0.454277  | -1.807874 |
| H  | -5.351134 | 0.220130  | 2.466220  |
| H  | -6.778012 | 0.587226  | 0.465870  |
| Cl | 0.475772  | -0.233357 | -2.458698 |
| Cl | 0.311192  | -0.399134 | 2.315446  |
| C  | 0.148775  | -2.560775 | -0.198198 |
| N  | -1.642554 | -0.454370 | -0.110647 |
| C  | -1.120044 | -2.436773 | -0.208183 |
| C  | -2.438712 | -3.092757 | -0.283495 |
| H  | -2.269462 | -4.172849 | -0.351570 |
| H  | -3.004449 | -2.770775 | -1.162158 |
| H  | -3.048833 | -2.890123 | 0.601076  |
| C  | 1.193288  | -3.618232 | -0.288429 |
| H  | 1.837360  | -3.599560 | 0.596034  |
| H  | 1.831291  | -3.436415 | -1.158974 |
| H  | 0.757872  | -4.620213 | -0.377270 |

### IM1

B3LYP/BS1 SCF energy: -2709.046318 a.u.  
M06-L/BS2 SCF energy in solution:  
-2709.192906 a.u.



M06-L/BS2 Free energy in solution:  
-2708.889254 a.u.

|    |           |           |           |
|----|-----------|-----------|-----------|
| Ti | -0.131509 | -0.421499 | 0.194915  |
| N  | -0.746885 | 1.949436  | 0.087523  |
| C  | -1.190411 | 4.707129  | -0.082655 |
| C  | -0.300116 | 2.785383  | 1.042686  |
| C  | -1.413226 | 2.482721  | -0.952791 |
| C  | -1.666658 | 3.846231  | -1.069779 |
| C  | -0.488845 | 4.164163  | 0.991127  |
| H  | 0.201125  | 2.317401  | 1.882501  |
| H  | -1.729736 | 1.785040  | -1.718742 |
| H  | -2.217704 | 4.218056  | -1.926883 |
| H  | -0.096438 | 4.789521  | 1.785755  |
| H  | -1.362084 | 5.777368  | -0.149622 |
| N  | -2.461160 | -0.706463 | -0.193874 |
| C  | -5.171491 | -1.252356 | -0.618915 |
| C  | -3.397689 | -0.285337 | 0.676591  |
| C  | -2.868049 | -1.401046 | -1.273965 |
| C  | -4.205540 | -1.697032 | -1.519999 |
| C  | -4.756862 | -0.530952 | 0.498432  |
| H  | -3.027314 | 0.248890  | 1.544017  |
| H  | -2.084736 | -1.705828 | -1.958474 |
| H  | -4.475108 | -2.262761 | -2.405341 |
| H  | -5.467780 | -0.163936 | 1.230837  |
| H  | -6.223706 | -1.464582 | -0.783781 |
| C  | 3.028211  | -0.311722 | 0.010733  |
| C  | 5.547538  | 0.733065  | -0.677294 |
| C  | 3.827806  | -0.952269 | -0.953053 |
| C  | 3.502317  | 0.867979  | 0.610978  |
| C  | 4.749305  | 1.382625  | 0.267421  |
| C  | 5.077557  | -0.432636 | -1.284801 |
| H  | 3.450594  | -1.833823 | -1.459853 |
| H  | 2.885204  | 1.355332  | 1.359110  |
| H  | 5.102576  | 2.291918  | 0.745613  |
| H  | 5.681366  | -0.936565 | -2.034320 |
| H  | 6.520886  | 1.134731  | -0.941953 |
| Cl | -0.632609 | -0.081643 | 2.508151  |
| Cl | 0.052175  | -0.156269 | -2.162098 |
| C  | 0.018196  | -2.351208 | 0.387748  |
| N  | 1.757687  | -0.774696 | 0.365083  |

|   |           |           |           |
|---|-----------|-----------|-----------|
| C | 1.380962  | -2.124584 | 0.475475  |
| C | 2.410256  | -3.186375 | 0.805750  |
| H | 2.031209  | -3.824005 | 1.608870  |
| H | 3.354865  | -2.741330 | 1.121160  |
| H | 2.604756  | -3.828108 | -0.060523 |
| C | -0.681069 | -3.639616 | 0.659729  |
| H | -1.568067 | -3.748046 | 0.026561  |
| H | -1.032070 | -3.674564 | 1.700601  |
| H | -0.047886 | -4.520149 | 0.491808  |

## IM2

B3LYP/BS1 SCF energy: -2460.741162 a.u.

M06-L/BS2 SCF energy in solution:  
-2460.850965 a.u.

M06-L/BS2 Free energy in solution:  
-2460.630482 a.u.

|    |           |           |           |
|----|-----------|-----------|-----------|
| Ti | -1.430246 | -0.522075 | 0.025007  |
| N  | 0.736042  | -1.629948 | 0.069596  |
| C  | 3.267321  | -2.803604 | 0.202460  |
| C  | 1.213587  | -2.358864 | -0.954004 |
| C  | 1.509689  | -1.485358 | 1.159542  |
| C  | 2.776389  | -2.050572 | 1.267676  |
| C  | 2.468849  | -2.961292 | -0.928539 |
| H  | 0.554736  | -2.463224 | -1.809791 |
| H  | 1.086311  | -0.904002 | 1.971483  |
| H  | 3.357850  | -1.901611 | 2.170932  |
| H  | 2.803937  | -3.542790 | -1.780666 |
| H  | 4.250714  | -3.261100 | 0.254569  |
| C  | 0.913556  | 1.661344  | -0.153820 |
| C  | 3.500605  | 2.761366  | -0.141669 |
| C  | 1.333017  | 2.488849  | 0.902829  |
| C  | 1.811556  | 1.383075  | -1.196454 |
| C  | 3.094242  | 1.928506  | -1.186131 |
| C  | 2.614430  | 3.037579  | 0.901430  |
| H  | 0.654949  | 2.681779  | 1.728487  |
| H  | 1.484347  | 0.745350  | -2.011007 |
| H  | 3.775757  | 1.707679  | -2.002658 |
| H  | 2.923509  | 3.675949  | 1.724220  |
| H  | 4.498726  | 3.188538  | -0.138822 |
| Cl | -2.043135 | -1.728791 | -1.799298 |

|    |           |           |           |    |           |           |           |
|----|-----------|-----------|-----------|----|-----------|-----------|-----------|
| Cl | -1.818344 | -1.481370 | 2.047656  | H  | 5.749131  | 1.172630  | 1.388751  |
| C  | -2.677348 | 0.990691  | 0.018737  | H  | 6.577390  | -0.946951 | 0.384817  |
| N  | -0.369194 | 1.084167  | -0.166803 | Cl | -0.469329 | -1.707495 | -1.839493 |
| C  | -1.579620 | 1.811637  | -0.137263 | Cl | -0.275600 | -1.173542 | 2.105108  |
| C  | -1.567517 | 3.305834  | -0.344127 | C  | -0.473655 | 1.610250  | -0.296629 |
| H  | -2.575741 | 3.675278  | -0.533989 | N  | 1.482710  | 0.389658  | -0.154560 |
| H  | -0.924702 | 3.565431  | -1.191327 | C  | 0.908286  | 1.640827  | -0.392388 |
| H  | -1.169841 | 3.826652  | 0.532788  | C  | 1.733866  | 2.836664  | -0.804289 |
| C  | -4.118725 | 1.374823  | 0.053975  | H  | 1.151217  | 3.473936  | -1.473758 |
| H  | -4.569963 | 1.073478  | 1.007117  | H  | 2.656202  | 2.532397  | -1.303487 |
| H  | -4.678289 | 0.855257  | -0.732905 | H  | 2.006889  | 3.441558  | 0.067832  |
| H  | -4.289874 | 2.452087  | -0.068092 | C  | -1.398730 | 2.757982  | -0.550809 |

**IM2'**

B3LYP/BS1 SCF energy: -2460.744607 a.u.  
M06-L/BS2 SCF energy in solution:  
-2460.856094a.u.  
M06-L/BS2 Free energy in solution:  
-2460.634599 a.u.

|    |           |           |           |
|----|-----------|-----------|-----------|
| Ti | -0.311823 | -0.325880 | -0.014111 |
| N  | -2.656947 | -0.295711 | 0.108796  |
| C  | -5.430909 | 0.022814  | 0.262484  |
| C  | -3.440002 | -0.514154 | -0.964657 |
| C  | -3.249688 | 0.081097  | 1.258628  |
| C  | -4.625259 | 0.250228  | 1.377009  |
| C  | -4.823839 | -0.366339 | -0.929495 |
| H  | -2.928836 | -0.826707 | -1.868066 |
| H  | -2.589559 | 0.235685  | 2.104217  |
| H  | -5.048106 | 0.550678  | 2.329409  |
| H  | -5.405423 | -0.559038 | -1.824381 |
| H  | -6.508212 | 0.144165  | 0.322729  |
| C  | 2.841060  | 0.084300  | -0.014158 |
| C  | 5.536168  | -0.660310 | 0.273956  |
| C  | 3.735225  | 0.904350  | 0.697875  |
| C  | 3.310863  | -1.123069 | -0.561217 |
| C  | 4.646743  | -1.486312 | -0.417661 |
| C  | 5.071389  | 0.531400  | 0.832347  |
| H  | 3.376515  | 1.812649  | 1.169188  |
| H  | 2.616289  | -1.754646 | -1.105761 |
| H  | 4.994699  | -2.419649 | -0.850626 |

|    |           |           |           |
|----|-----------|-----------|-----------|
| H  | 5.749131  | 1.172630  | 1.388751  |
| H  | 6.577390  | -0.946951 | 0.384817  |
| Cl | -0.469329 | -1.707495 | -1.839493 |
| Cl | -0.275600 | -1.173542 | 2.105108  |
| C  | -0.473655 | 1.610250  | -0.296629 |
| N  | 1.482710  | 0.389658  | -0.154560 |
| C  | 0.908286  | 1.640827  | -0.392388 |
| C  | 1.733866  | 2.836664  | -0.804289 |
| H  | 1.151217  | 3.473936  | -1.473758 |
| H  | 2.656202  | 2.532397  | -1.303487 |
| H  | 2.006889  | 3.441558  | 0.067832  |
| C  | -1.398730 | 2.757982  | -0.550809 |
| H  | -2.436040 | 2.424170  | -0.641300 |
| H  | -1.150394 | 3.297399  | -1.475848 |
| H  | -1.367301 | 3.492716  | 0.265638  |

**TS2**

B3LYP/BS1 SCF energy: -2616.714624 a.u.  
M06-L/BS2 SCF energy in solution:  
-2616.855893 a.u.  
M06-L/BS2 Free energy in solution:  
-2616.551504 a.u.

|    |           |           |           |
|----|-----------|-----------|-----------|
| Ti | 1.258290  | -0.066423 | -0.383633 |
| N  | -0.169094 | 1.735920  | -0.101053 |
| C  | -1.744943 | 4.020585  | 0.193715  |
| C  | -0.152881 | 2.709246  | -1.032174 |
| C  | -0.967868 | 1.889289  | 0.970100  |
| C  | -1.771283 | 3.009558  | 1.153583  |
| C  | -0.918357 | 3.866351  | -0.917226 |
| H  | 0.480931  | 2.533385  | -1.893651 |
| H  | -0.947988 | 1.078907  | 1.688607  |
| H  | -2.404380 | 3.078829  | 2.031343  |
| H  | -0.865917 | 4.621647  | -1.693564 |
| H  | -2.359020 | 4.908707  | 0.308199  |
| C  | -1.965806 | -1.161286 | 0.257801  |
| C  | -4.766116 | -1.027145 | 0.018266  |
| C  | -2.782468 | -1.104824 | 1.399473  |
| C  | -2.571749 | -1.139218 | -1.009612 |
| C  | -3.960552 | -1.070006 | -1.121337 |
| C  | -4.170319 | -1.046395 | 1.280751  |



**TS3**

B3LYP/BS1 SCF energy: -2616.762200 a.u.

M06-L/BS2 SCF energy in solution:  
-2616.895706 a.u.M06-L/BS2 Free energy in solution:  
-2616.586303 a.u.

|    |           |           |           |
|----|-----------|-----------|-----------|
| Ti | -0.400874 | 0.135838  | -0.700061 |
| N  | -2.437286 | -0.702401 | -0.077175 |
| C  | -4.887859 | -1.680875 | 0.842730  |
| C  | -3.461065 | 0.132741  | 0.183729  |
| C  | -2.631463 | -2.022430 | 0.104402  |
| C  | -3.835321 | -2.550136 | 0.560668  |
| C  | -4.694778 | -0.314911 | 0.648183  |
| H  | -3.276594 | 1.181135  | -0.019355 |
| H  | -1.794150 | -2.663166 | -0.147517 |
| H  | -3.938426 | -3.622777 | 0.683038  |
| H  | -5.486178 | 0.401335  | 0.840207  |
| H  | -5.840613 | -2.061311 | 1.198375  |
| C  | 2.717729  | -0.410554 | 0.097219  |
| C  | 5.180460  | -1.697573 | 0.464364  |
| C  | 3.783474  | 0.260969  | 0.722154  |
| C  | 2.888969  | -1.737294 | -0.327064 |
| C  | 4.116603  | -2.371007 | -0.138373 |
| C  | 5.008190  | -0.378653 | 0.891800  |
| H  | 3.638514  | 1.277076  | 1.074039  |
| H  | 2.069332  | -2.243120 | -0.823127 |
| H  | 4.243227  | -3.395239 | -0.476587 |
| H  | 5.827517  | 0.151399  | 1.368746  |
| H  | 6.135410  | -2.195538 | 0.602013  |
| Cl | -1.588080 | 1.728041  | -2.026820 |
| Cl | -0.143840 | -1.666111 | -2.126781 |
| C  | 0.298809  | 2.166841  | 0.603961  |
| N  | 1.465223  | 0.226186  | -0.045718 |
| C  | 1.301776  | 1.617331  | -0.221064 |
| C  | 2.171395  | 2.406199  | -1.164766 |
| H  | 1.550966  | 2.908745  | -1.914990 |
| H  | 2.865773  | 1.749431  | -1.691986 |
| H  | 2.757972  | 3.177430  | -0.649517 |
| C  | -0.089117 | 3.615504  | 0.503309  |

|   |           |           |           |
|---|-----------|-----------|-----------|
| H | 0.791475  | 4.265120  | 0.544293  |
| H | -0.761965 | 3.906928  | 1.311973  |
| H | -0.603189 | 3.803047  | -0.445711 |
| C | 0.046074  | -0.103008 | 1.266952  |
| C | -0.286763 | 1.249887  | 1.517992  |
| C | 0.211393  | -1.216162 | 2.242157  |
| H | 1.049859  | -1.849960 | 1.929773  |
| H | -0.676909 | -1.860383 | 2.255838  |
| H | 0.410946  | -0.872200 | 3.264558  |
| C | -1.138177 | 1.678293  | 2.693249  |
| H | -0.655838 | 2.466632  | 3.282978  |
| H | -1.328438 | 0.834938  | 3.362103  |
| H | -2.114350 | 2.061777  | 2.374028  |

**IM4**

B3LYP/BS1 SCF energy: -2616.790187 a.u.

M06-L/BS2 SCF energy in solution:  
-2616.926310 a.u.M06-L/BS2 Free energy in solution:  
-2616.615041 a.u.

|    |           |           |           |
|----|-----------|-----------|-----------|
| Ti | -0.414903 | 0.125068  | -0.755059 |
| N  | -2.449027 | -0.574414 | -0.066424 |
| C  | -4.935893 | -1.505324 | 0.800298  |
| C  | -3.520782 | 0.240762  | -0.041920 |
| C  | -2.612205 | -1.853733 | 0.321512  |
| C  | -3.832528 | -2.356294 | 0.763693  |
| C  | -4.775080 | -0.184085 | 0.387186  |
| H  | -3.352543 | 1.248752  | -0.402787 |
| H  | -1.733602 | -2.484131 | 0.252325  |
| H  | -3.908888 | -3.396014 | 1.062508  |
| H  | -5.605715 | 0.513219  | 0.386821  |
| H  | -5.903094 | -1.867064 | 1.136122  |
| C  | 2.760194  | -0.287502 | 0.218633  |
| C  | 5.396397  | -1.187700 | 0.224397  |
| C  | 3.694633  | 0.302972  | 1.076879  |
| C  | 3.135133  | -1.322830 | -0.637590 |
| C  | 4.457944  | -1.771095 | -0.627145 |
| C  | 5.013193  | -0.148477 | 1.075990  |
| H  | 3.383362  | 1.108105  | 1.735509  |
| H  | 2.394660  | -1.760517 | -1.298136 |



|   |           |          |           |    |           |           |           |
|---|-----------|----------|-----------|----|-----------|-----------|-----------|
| C | 0.420032  | 3.089792 | 0.323193  | H  | -5.698953 | -0.753024 | -2.017781 |
| C | 2.885401  | 4.371468 | 0.611153  | C  | -0.008400 | 1.876735  | -0.065513 |
| C | 0.922929  | 3.881983 | -0.721207 | C  | -0.727467 | 4.537932  | 0.486037  |
| C | 1.158542  | 2.930475 | 1.503604  | C  | -1.010356 | 2.515651  | -0.815968 |
| C | 2.384527  | 3.582038 | 1.646816  | C  | 0.641800  | 2.591546  | 0.954098  |
| C | 2.153035  | 4.513294 | -0.573709 | C  | 0.278990  | 3.910219  | 1.221808  |
| H | 0.342499  | 3.979536 | -1.630395 | C  | -1.368388 | 3.831370  | -0.534615 |
| H | 0.749963  | 2.327509 | 2.306546  | H  | -1.488678 | 1.977710  | -1.627750 |
| H | 2.945413  | 3.471872 | 2.569890  | H  | 1.424535  | 2.106096  | 1.525617  |
| H | 2.546689  | 5.117772 | -1.385726 | H  | 0.790109  | 4.450117  | 2.013967  |
| H | 3.842044  | 4.873578 | 0.722299  | H  | -2.144548 | 4.311206  | -1.124369 |
| C | -2.944024 | 2.417131 | -0.622683 | H  | -1.003669 | 5.565997  | 0.698954  |
| C | -5.578808 | 1.535478 | -0.896658 | Cl | 0.257095  | -3.055585 | -0.252232 |
| C | -3.644384 | 2.652177 | -1.815339 | Cl | -0.873321 | -1.033119 | 2.768902  |
| C | -3.576524 | 1.763658 | 0.448577  | N  | 0.334447  | 0.540481  | -0.411452 |
| C | -4.893001 | 1.334466 | 0.305548  | C  | 2.661069  | -0.179242 | -0.160125 |
| C | -4.950191 | 2.191395 | -1.958043 | C  | 3.065614  | 0.500090  | -1.320152 |
| H | -3.141989 | 3.186755 | -2.614736 | C  | 3.584648  | -0.971627 | 0.543174  |
| H | -3.040280 | 1.627010 | 1.381221  | C  | 4.376685  | 0.368833  | -1.773389 |
| H | -5.390007 | 0.845635 | 1.137925  | H  | 2.349057  | 1.117243  | -1.849604 |
| H | -5.483654 | 2.358518 | -2.888926 | C  | 4.889463  | -1.093359 | 0.077175  |
| H | -6.605567 | 1.196664 | -0.998876 | H  | 3.266497  | -1.480647 | 1.447636  |

### IM5

B3LYP/BS1 SCF energy: -2591.122419 a.u.  
M06-L/BS2 SCF energy in solution:  
-2591.252257 a.u.  
M06-L/BS2 Free energy in solution:  
-2591.021971 a.u.

|    |           |           |           |
|----|-----------|-----------|-----------|
| Ti | -0.199996 | -1.026349 | 0.596295  |
| N  | -2.238986 | -0.797886 | -0.279429 |
| C  | -4.728938 | -0.764892 | -1.530460 |
| C  | -2.334277 | -0.717066 | -1.622386 |
| C  | -3.373016 | -0.860451 | 0.446331  |
| C  | -4.633256 | -0.841510 | -0.142663 |
| C  | -3.556362 | -0.702674 | -2.283138 |
| H  | -1.394524 | -0.654164 | -2.159815 |
| H  | -3.246454 | -0.926166 | 1.520851  |
| H  | -5.516748 | -0.888456 | 0.483990  |
| H  | -3.580600 | -0.642361 | -3.365409 |

|   |          |           |           |
|---|----------|-----------|-----------|
| H | 4.683270 | 0.894736  | -2.673201 |
| H | 5.595481 | -1.711856 | 0.623591  |
| H | 6.314909 | -0.518698 | -1.439179 |
| N | 1.363741 | -0.060078 | 0.355176  |

### IM6

B3LYP/BS1 SCF energy: -3087.736519 a.u.  
M06-L/BS2 SCF energy in solution:  
-3087.939756 a.u.  
M06-L/BS2 Free energy in solution:  
-3087.541642 a.u.

|    |          |          |           |
|----|----------|----------|-----------|
| Ti | 0.243189 | 0.012560 | -0.004905 |
| N  | 0.713582 | 2.270928 | 0.500340  |
| C  | 1.190994 | 4.953734 | 1.155776  |
| C  | 1.148162 | 2.622004 | 1.727502  |
| C  | 0.504910 | 3.255215 | -0.395711 |
| C  | 0.734270 | 4.598884 | -0.110331 |

|    |           |           |           |                                         |           |           |           |
|----|-----------|-----------|-----------|-----------------------------------------|-----------|-----------|-----------|
| C  | 1.398067  | 3.941851  | 2.091363  | Cl                                      | 0.528294  | 0.635780  | -2.302366 |
| H  | 1.286074  | 1.808349  | 2.429292  | C                                       | -2.319401 | -1.698567 | 0.380477  |
| H  | 0.148461  | 2.942704  | -1.369010 | C                                       | -2.373403 | -2.985653 | -0.185218 |
| H  | 0.546457  | 5.344142  | -0.875602 | C                                       | -3.125427 | -1.408325 | 1.495807  |
| H  | 1.746652  | 4.160778  | 3.094924  | C                                       | -3.192620 | -3.964250 | 0.371801  |
| H  | 1.377320  | 5.993083  | 1.409717  | H                                       | -1.785621 | -3.193821 | -1.073016 |
| N  | 0.921383  | -2.193975 | -0.508243 | C                                       | -3.942404 | -2.395810 | 2.040728  |
| C  | 1.646203  | -4.821139 | -1.164495 | H                                       | -3.094151 | -0.412298 | 1.921410  |
| C  | 0.824956  | -3.190055 | 0.393765  | C                                       | -3.981643 | -3.678614 | 1.488896  |
| C  | 1.367074  | -2.507039 | -1.741857 | H                                       | -3.225602 | -4.952497 | -0.079376 |
| C  | 1.737357  | -3.798110 | -2.106371 | H                                       | -4.556530 | -2.158602 | 2.905413  |
| C  | 1.179196  | -4.506378 | 0.108445  | H                                       | -4.626053 | -4.441147 | 1.916065  |
| H  | 0.456273  | -2.909411 | 1.372099  | N                                       | -1.506685 | -0.732877 | -0.236047 |
| H  | 1.415868  | -1.687394 | -2.448540 |                                         |           |           |           |
| H  | 2.088326  | -3.986412 | -3.115299 | <b>TS5</b>                              |           |           |           |
| H  | 1.078069  | -5.262712 | 0.879203  | B3LYP/BS1 SCF energy: -5182.177192 a.u. |           |           |           |
| H  | 1.928556  | -5.838550 | -1.418651 | M06-L/BS2 SCF energy in solution:       |           |           |           |
| N  | 2.775386  | 0.128161  | 0.000774  | -5182.524162 a.u.                       |           |           |           |
| C  | 5.576838  | 0.256977  | 0.008745  | M06-L/BS2 Free energy in solution:      |           |           |           |
| C  | 3.506283  | -0.618070 | 0.848901  | -5182.0398 a.u.                         |           |           |           |
| C  | 3.439474  | 0.938334  | -0.843395 |                                         |           |           |           |
| C  | 4.828620  | 1.037059  | -0.869975 | Ti                                      | -2.807638 | -0.058705 | 1.214396  |
| C  | 4.898425  | -0.588676 | 0.883387  | Ti                                      | 1.419426  | 0.114866  | -0.258065 |
| H  | 2.943309  | -1.243122 | 1.531916  | Cl                                      | -5.049902 | -0.377957 | 1.179201  |
| H  | 2.824520  | 1.508681  | -1.529226 | Cl                                      | 1.069780  | 0.071524  | -2.519577 |
| H  | 5.304408  | 1.712312  | -1.573213 | Cl                                      | 0.599385  | -0.243163 | 1.889986  |
| H  | 5.430262  | -1.217490 | 1.589525  | N                                       | 3.282426  | 0.270842  | 0.048139  |
| H  | 6.661742  | 0.306917  | 0.011802  | N                                       | 2.897829  | -1.049923 | -0.269693 |
| N  | -1.567083 | 0.589444  | 0.214026  | N                                       | -2.453517 | 0.960681  | -0.253767 |
| C  | -2.477524 | 1.474116  | -0.384839 | N                                       | -1.655612 | -0.177071 | -0.483784 |
| C  | -4.339609 | 3.287368  | -1.460165 | C                                       | -2.532262 | 2.117760  | -1.022969 |
| C  | -3.264189 | 1.112473  | -1.493277 | C                                       | -3.326526 | 3.175702  | -0.536307 |
| C  | -2.651611 | 2.746004  | 0.191033  | C                                       | -1.866155 | 2.251496  | -2.253817 |
| C  | -3.569669 | 3.642461  | -0.349661 | C                                       | -3.443401 | 4.348890  | -1.273353 |
| C  | -4.180670 | 2.018121  | -2.021784 | H                                       | -3.842543 | 3.060443  | 0.411705  |
| H  | -3.139723 | 0.126823  | -1.925948 | C                                       | -1.994385 | 3.437256  | -2.976250 |
| H  | -2.077783 | 3.005145  | 1.074479  | H                                       | -1.257476 | 1.437247  | -2.627112 |
| H  | -3.694924 | 4.619575  | 0.109479  | C                                       | -2.778734 | 4.488588  | -2.496655 |
| H  | -4.778743 | 1.726854  | -2.881186 | H                                       | -4.060449 | 5.157892  | -0.892591 |
| H  | -5.061174 | 3.985130  | -1.874467 | H                                       | -1.477821 | 3.532772  | -3.927187 |
| Cl | 0.572989  | -0.576287 | 2.294888  | H                                       | -2.877188 | 5.404950  | -3.070895 |

|   |           |           |           |                                         |           |           |           |
|---|-----------|-----------|-----------|-----------------------------------------|-----------|-----------|-----------|
| C | -2.167755 | -1.093637 | -1.456190 | H                                       | -0.418962 | 4.767739  | 1.575020  |
| C | -3.367111 | -0.905364 | -2.164850 | H                                       | 2.418273  | 5.050768  | -1.667517 |
| C | -1.416813 | -2.258851 | -1.693722 | H                                       | 0.883932  | 6.193135  | -0.035620 |
| C | -3.793822 | -1.862290 | -3.087453 | N                                       | -2.421250 | -2.172304 | 1.754663  |
| H | -3.964299 | -0.018141 | -1.991804 | C                                       | -2.986661 | -3.187825 | 1.069841  |
| C | -1.851881 | -3.208309 | -2.613501 | C                                       | -1.718133 | -2.455357 | 2.870891  |
| H | -0.485651 | -2.404134 | -1.155741 | C                                       | -2.856865 | -4.513532 | 1.466765  |
| C | -3.044523 | -3.016622 | -3.318246 | H                                       | -3.558488 | -2.918985 | 0.190020  |
| H | -4.721718 | -1.698506 | -3.628319 | C                                       | -1.548222 | -3.756489 | 3.331548  |
| H | -1.252190 | -4.097316 | -2.787507 | H                                       | -1.278899 | -1.613618 | 3.392225  |
| H | -3.379803 | -3.754064 | -4.041250 | C                                       | -2.124339 | -4.805210 | 2.616828  |
| C | 3.639018  | -1.771514 | -1.217261 | H                                       | -3.327697 | -5.294641 | 0.880518  |
| C | 4.877306  | -1.324155 | -1.706427 | H                                       | -0.971776 | -3.932112 | 4.232752  |
| C | 3.138015  | -3.016216 | -1.636581 | H                                       | -2.007695 | -5.831503 | 2.951693  |
| C | 5.585412  | -2.106784 | -2.616417 | Cl                                      | -2.467087 | 1.246819  | 3.028729  |
| H | 5.268294  | -0.370625 | -1.370181 |                                         |           |           |           |
| C | 3.854508  | -3.786612 | -2.546981 | <b>IM7</b>                              |           |           |           |
| H | 2.192263  | -3.366761 | -1.234080 | B3LYP/BS1 SCF energy: -5182.191947 a.u. |           |           |           |
| C | 5.082360  | -3.337965 | -3.042772 | M06-L/BS2 SCF energy in solution:       |           |           |           |
| H | 6.540911  | -1.751302 | -2.992495 | -5182.5448 a.u.                         |           |           |           |
| H | 3.455202  | -4.744596 | -2.868347 | M06-L/BS2 Free energy in solution:      |           |           |           |
| H | 5.641820  | -3.943503 | -3.749432 | -5182.0558 a.u.                         |           |           |           |
| C | 4.060782  | 0.496405  | 1.204043  |                                         |           |           |           |
| C | 4.391747  | 1.819643  | 1.542580  | Ti                                      | 1.998274  | -1.175982 | -1.104278 |
| C | 4.560274  | -0.559066 | 1.984133  | Ti                                      | -0.713274 | 0.829104  | 0.384472  |
| C | 5.189507  | 2.078175  | 2.654129  | Cl                                      | 3.629938  | -2.654892 | -0.476072 |
| H | 4.026991  | 2.633677  | 0.925194  | Cl                                      | -0.623238 | 1.789125  | 2.465913  |
| C | 5.360915  | -0.285945 | 3.091633  | Cl                                      | -0.107969 | -0.016416 | -1.917745 |
| H | 4.309209  | -1.578939 | 1.716108  | N                                       | -2.509117 | 0.972942  | -0.272573 |
| C | 5.680116  | 1.029047  | 3.436077  | N                                       | -2.363381 | -0.047571 | 0.702616  |
| H | 5.435181  | 3.106093  | 2.906662  | N                                       | 2.337976  | 0.182910  | 0.087312  |
| H | 5.739059  | -1.111038 | 3.689253  | N                                       | 1.185428  | -0.351073 | 0.711937  |
| H | 6.306518  | 1.234226  | 4.298938  | C                                       | 3.127325  | 1.258018  | 0.515749  |
| N | 1.225966  | 2.335766  | -0.068584 | C                                       | 4.256765  | 1.584253  | -0.261767 |
| C | 0.405512  | 2.944024  | 0.809730  | C                                       | 2.835217  | 2.009814  | 1.667008  |
| C | 1.927974  | 3.096941  | -0.933880 | C                                       | 5.066689  | 2.653146  | 0.107544  |
| C | 0.257045  | 4.327815  | 0.850700  | H                                       | 4.483045  | 0.994986  | -1.143243 |
| H | -0.133470 | 2.299480  | 1.493886  | C                                       | 3.659658  | 3.078070  | 2.019277  |
| C | 1.833927  | 4.482630  | -0.952100 | H                                       | 1.973592  | 1.762916  | 2.273369  |
| H | 2.576620  | 2.561581  | -1.618190 | C                                       | 4.774701  | 3.408662  | 1.247586  |
| C | 0.980609  | 5.111627  | -0.044091 | H                                       | 5.936012  | 2.892864  | -0.498121 |



|   |           |           |           |                                         |           |           |           |
|---|-----------|-----------|-----------|-----------------------------------------|-----------|-----------|-----------|
| H | 3.423188  | 3.651396  | 2.911089  | H                                       | -1.883600 | 3.633241  | 0.427468  |
| H | 5.413144  | 4.239134  | 1.533336  | C                                       | 0.324440  | 5.430483  | -1.422987 |
| C | 1.413546  | -1.164473 | 1.880124  | H                                       | 2.049121  | 4.513348  | -2.363684 |
| C | 2.612460  | -1.172368 | 2.607161  | H                                       | -1.483697 | 5.968952  | -0.352720 |
| C | 0.367888  | -2.004156 | 2.290440  | H                                       | 0.534074  | 6.434524  | -1.779560 |
| C | 2.739982  | -1.986203 | 3.732616  | N                                       | 0.631418  | -3.002057 | -1.349920 |
| H | 3.448564  | -0.563519 | 2.291662  | C                                       | -0.662888 | -3.057413 | -0.977702 |
| C | 0.504215  | -2.815339 | 3.414952  | C                                       | 1.147760  | -4.061772 | -2.007765 |
| H | -0.549091 | -2.027041 | 1.713634  | C                                       | -1.468585 | -4.163375 | -1.225553 |
| C | 1.691310  | -2.806936 | 4.148925  | H                                       | -1.068645 | -2.181349 | -0.488118 |
| H | 3.676016  | -1.978460 | 4.283596  | C                                       | 0.400160  | -5.193942 | -2.313563 |
| H | -0.318392 | -3.460487 | 3.711026  | H                                       | 2.194341  | -3.995215 | -2.279410 |
| H | 1.800972  | -3.437857 | 5.025552  | C                                       | -0.931938 | -5.252372 | -1.909243 |
| C | -3.330601 | -0.108973 | 1.730051  | H                                       | -2.500732 | -4.153761 | -0.893397 |
| C | -4.560850 | 0.563658  | 1.621764  | H                                       | 0.866629  | -6.010963 | -2.852745 |
| C | -3.080907 | -0.898098 | 2.866312  | H                                       | -1.539296 | -6.126223 | -2.125102 |
| C | -5.513644 | 0.444497  | 2.632179  | Cl                                      | 2.984809  | -0.490029 | -3.033448 |
| H | -4.761393 | 1.173243  | 0.749439  |                                         |           |           |           |
| C | -4.041205 | -1.008604 | 3.867669  |                                         |           |           |           |
| H | -2.126089 | -1.396305 | 2.974178  | <b>TS6</b>                              |           |           |           |
| C | -5.264908 | -0.343054 | 3.757396  | B3LYP/BS1 SCF energy: -5182.162851 a.u. |           |           |           |
| H | -6.458999 | 0.971152  | 2.534493  | M06-L/BS2 SCF energy in solution:       |           |           |           |
| H | -3.827427 | -1.613630 | 4.744321  | -5182.525362 a.u.                       |           |           |           |
| H | -6.011911 | -0.434163 | 4.540205  | M06-L/BS2 Free energy in solution:      |           |           |           |
| C | -3.226712 | 0.699401  | -1.446147 | -5182.0390 a.u.                         |           |           |           |
| C | -3.221146 | 1.665773  | -2.469757 |                                         |           |           |           |
| C | -3.994305 | -0.466764 | -1.612539 | Ti                                      | -1.827383 | 0.470995  | -1.301545 |
| C | -3.952549 | 1.458334  | -3.634129 | Ti                                      | 0.594341  | -0.831973 | 0.425925  |
| H | -2.635320 | 2.569580  | -2.339852 | Cl                                      | -3.704312 | 1.816549  | -1.054357 |
| C | -4.723716 | -0.661673 | -2.784955 | Cl                                      | 0.080014  | -2.001668 | 2.366937  |
| H | -4.018803 | -1.204005 | -0.818123 | Cl                                      | 0.552927  | -0.274553 | -1.952801 |
| C | -4.709433 | 0.294191  | -3.801646 | N                                       | 2.606325  | -0.884127 | 0.413421  |
| H | -3.931989 | 2.210575  | -4.417824 | N                                       | 2.040959  | 0.192444  | 1.071398  |
| H | -5.313484 | -1.567332 | -2.899692 | N                                       | -2.382058 | -0.830457 | -0.211188 |
| H | -5.282121 | 0.138090  | -4.710766 | N                                       | -0.754557 | 0.670642  | 0.501987  |
| N | -0.213884 | 2.852731  | -0.506099 | C                                       | -3.166091 | -1.457301 | 0.691946  |
| C | 0.862338  | 3.097454  | -1.277049 | C                                       | -4.157020 | -0.727013 | 1.410232  |
| C | -1.028142 | 3.880259  | -0.190620 | C                                       | -3.047164 | -2.856866 | 0.922729  |
| C | 1.166880  | 4.370820  | -1.749876 | C                                       | -4.983646 | -1.378659 | 2.314423  |
| H | 1.482088  | 2.246049  | -1.527678 | H                                       | -4.256345 | 0.333666  | 1.213567  |
| C | -0.796311 | 5.177686  | -0.631046 | C                                       | -3.894539 | -3.491760 | 1.816660  |
|   |           |           |           | H                                       | -2.293473 | -3.412412 | 0.378021  |

|   |           |           |           |                                         |           |           |           |
|---|-----------|-----------|-----------|-----------------------------------------|-----------|-----------|-----------|
| C | -4.859480 | -2.757782 | 2.520185  | H                                       | -0.854680 | -2.595097 | -1.956751 |
| H | -5.736686 | -0.814909 | 2.857267  | C                                       | 1.463228  | -5.205397 | -0.406141 |
| H | -3.803439 | -4.561645 | 1.978685  | H                                       | 2.015804  | -3.541632 | 0.862525  |
| H | -5.514557 | -3.261971 | 3.224690  | C                                       | 0.633259  | -5.600743 | -1.454952 |
| C | -1.181602 | 1.506783  | 1.514726  | H                                       | -0.888250 | -4.910470 | -2.837220 |
| C | -1.232212 | 1.084658  | 2.871665  | H                                       | 2.147056  | -5.900842 | 0.068536  |
| C | -1.556243 | 2.850401  | 1.227093  | H                                       | 0.654069  | -6.622059 | -1.823642 |
| C | -1.636842 | 1.958151  | 3.873192  | N                                       | -0.930307 | 2.445629  | -2.294668 |
| H | -0.954381 | 0.067364  | 3.111363  | C                                       | 0.242872  | 2.981904  | -1.912782 |
| C | -1.919735 | 3.723632  | 2.242395  | C                                       | -1.583686 | 3.009334  | -3.326645 |
| H | -1.532227 | 3.193295  | 0.201867  | C                                       | 0.796305  | 4.099366  | -2.530345 |
| C | -1.971171 | 3.281600  | 3.569621  | H                                       | 0.747606  | 2.485084  | -1.091309 |
| H | -1.678668 | 1.608215  | 4.900439  | C                                       | -1.091784 | 4.118955  | -4.009275 |
| H | -2.179131 | 4.749718  | 1.999051  | H                                       | -2.525487 | 2.548507  | -3.601648 |
| H | -2.269836 | 3.964467  | 4.359795  | C                                       | 0.118074  | 4.678353  | -3.602246 |
| C | 2.712583  | 0.917321  | 2.059443  | H                                       | 1.742315  | 4.496127  | -2.177868 |
| C | 3.926020  | 0.452623  | 2.603070  | H                                       | -1.654045 | 4.529735  | -4.840842 |
| C | 2.171258  | 2.133793  | 2.514338  | H                                       | 0.526007  | 5.546573  | -4.111500 |
| C | 4.569226  | 1.190440  | 3.592749  | Cl                                      | -2.442444 | -0.465988 | -3.337834 |
| H | 4.340537  | -0.484864 | 2.251382  |                                         |           |           |           |
| C | 2.829542  | 2.860721  | 3.501301  | <b>IM8</b>                              |           |           |           |
| H | 1.246426  | 2.498974  | 2.084962  | B3LYP/BS1 SCF energy: -5182.224803 a.u. |           |           |           |
| C | 4.030073  | 2.396566  | 4.047426  | M06-L/BS2 SCF energy in solution:       |           |           |           |
| H | 5.499926  | 0.818410  | 4.011872  | -5182.575551 a.u.                       |           |           |           |
| H | 2.401822  | 3.798419  | 3.844473  | M06-L/BS2 Free energy in solution:      |           |           |           |
| H | 4.539079  | 2.968459  | 4.817298  | -5182.0916 a.u.                         |           |           |           |
| C | 3.628742  | -0.662057 | -0.521376 |                                         |           |           |           |
| C | 4.159970  | -1.791639 | -1.175673 | Ti                                      | 2.547341  | 0.783534  | 0.017744  |
| C | 4.171952  | 0.606503  | -0.805441 | Ti                                      | -0.275740 | 0.450624  | 0.028747  |
| C | 5.198816  | -1.654105 | -2.089308 | Cl                                      | 3.464573  | 1.558791  | 1.969017  |
| H | 3.746745  | -2.769080 | -0.952222 | Cl                                      | -0.680302 | 0.198517  | 2.366536  |
| C | 5.214908  | 0.729888  | -1.719711 | Cl                                      | -0.714641 | 0.207150  | -2.285874 |
| H | 3.769640  | 1.485071  | -0.315860 | N                                       | -2.255248 | -0.836712 | 0.061595  |
| C | 5.737249  | -0.393551 | -2.365559 | N                                       | -1.830401 | -2.001293 | -0.071328 |
| H | 5.593519  | -2.535368 | -2.587099 | N                                       | 0.932684  | 1.861259  | -0.005153 |
| H | 5.622557  | 1.714747  | -1.931112 | N                                       | 1.359077  | -0.636931 | 0.031351  |
| H | 6.551602  | -0.288423 | -3.075921 | C                                       | 0.985586  | 3.261716  | -0.148951 |
| N | 0.581613  | -2.971800 | -0.508210 | C                                       | 1.206780  | 4.087133  | 0.967947  |
| C | -0.213882 | -3.354890 | -1.525343 | C                                       | 0.810613  | 3.845228  | -1.417462 |
| C | 1.400742  | -3.889396 | 0.040855  | C                                       | 1.240742  | 5.472747  | 0.813509  |
| C | -0.222316 | -4.657607 | -2.019489 | H                                       | 1.361967  | 3.629001  | 1.938353  |

|   |           |           |           |                                         |           |           |           |
|---|-----------|-----------|-----------|-----------------------------------------|-----------|-----------|-----------|
| C | 0.848270  | 5.230933  | -1.556365 | C                                       | -2.035915 | 2.969884  | 1.182826  |
| H | 0.657094  | 3.198742  | -2.274637 | C                                       | -3.453310 | 3.696546  | -1.035300 |
| C | 1.061777  | 6.051268  | -0.444897 | H                                       | -2.438537 | 1.997317  | -1.910854 |
| H | 1.414784  | 6.101217  | 1.682669  | C                                       | -2.873258 | 4.079330  | 1.255066  |
| H | 0.714700  | 5.671390  | -2.540684 | H                                       | -1.461937 | 2.642618  | 2.041634  |
| H | 1.094983  | 7.130779  | -0.560465 | C                                       | -3.600084 | 4.451320  | 0.126234  |
| C | 1.428116  | -2.038009 | -0.063172 | H                                       | -3.990947 | 3.944919  | -1.944175 |
| C | 1.285942  | -2.837276 | 1.085395  | H                                       | -2.943010 | 4.636720  | 2.183070  |
| C | 1.653870  | -2.654472 | -1.307297 | H                                       | -4.261524 | 5.312555  | 0.149867  |
| C | 1.385787  | -4.224653 | 0.988033  | N                                       | 4.278354  | -0.863679 | 0.135858  |
| H | 1.088230  | -2.354471 | 2.036829  | C                                       | 5.047124  | -1.224790 | -0.907883 |
| C | 1.753783  | -4.043225 | -1.390713 | C                                       | 4.462710  | -1.504427 | 1.306359  |
| H | 1.739287  | -2.032430 | -2.192254 | C                                       | 6.019426  | -2.217797 | -0.820918 |
| C | 1.623351  | -4.835386 | -0.246001 | H                                       | 4.875077  | -0.685376 | -1.831906 |
| H | 1.275413  | -4.831276 | 1.882942  | C                                       | 5.409730  | -2.508901 | 1.476914  |
| H | 1.937881  | -4.507380 | -2.356247 | H                                       | 3.835687  | -1.184383 | 2.130073  |
| H | 1.703920  | -5.916384 | -0.315674 | C                                       | 6.206585  | -2.874045 | 0.393445  |
| C | -2.626689 | -3.179370 | -0.056545 | H                                       | 6.614032  | -2.462280 | -1.694587 |
| C | -3.719464 | -3.407918 | 0.797685  | H                                       | 5.514317  | -2.987806 | 2.444405  |
| C | -2.146521 | -4.208930 | -0.880676 | H                                       | 6.957755  | -3.651913 | 0.494398  |
| C | -4.340910 | -4.653778 | 0.788492  | Cl                                      | 3.457549  | 1.445623  | -1.966107 |
| H | -4.059958 | -2.635257 | 1.475053  |                                         |           |           |           |
| C | -2.805589 | -5.434852 | -0.912504 | <b>TS7</b>                              |           |           |           |
| H | -1.261592 | -4.022947 | -1.479552 | B3LYP/BS1 SCF energy: -5182.217549 a.u. |           |           |           |
| C | -3.901702 | -5.660713 | -0.076579 | M06-L/BS2 SCF energy in solution:       |           |           |           |
| H | -5.174630 | -4.838600 | 1.459206  | -5182.556156 a.u.                       |           |           |           |
| H | -2.448024 | -6.221840 | -1.569376 | M06-L/BS2 Free energy in solution:      |           |           |           |
| H | -4.402156 | -6.624534 | -0.083924 | -5182.0762 a.u.                         |           |           |           |
| C | -3.655712 | -0.487460 | 0.093052  |                                         |           |           |           |
| C | -4.176893 | 0.158667  | 1.217854  | Ti                                      | 2.983779  | -0.187333 | 0.142472  |
| C | -4.439786 | -0.701807 | -1.045797 | Ti                                      | 0.311027  | 0.707440  | -0.081396 |
| C | -5.514902 | 0.552987  | 1.212053  | Cl                                      | 3.926882  | 0.121717  | 2.206039  |
| H | -3.535746 | 0.328112  | 2.075775  | Cl                                      | -0.633461 | 0.504360  | 2.033299  |
| C | -5.770122 | -0.283621 | -1.042895 | Cl                                      | -0.286333 | 0.537043  | -2.292058 |
| H | -4.003498 | -1.175955 | -1.918360 | N                                       | -3.092180 | 0.039750  | -0.289252 |
| C | -6.312645 | 0.335084  | 0.085731  | N                                       | -3.037011 | -1.174241 | -0.573861 |
| H | -5.931818 | 1.038913  | 2.089235  | N                                       | 1.952057  | 1.498037  | 0.020026  |
| H | -6.382152 | -0.443072 | -1.925668 | N                                       | 1.341477  | -0.982139 | 0.019687  |
| H | -7.351094 | 0.652577  | 0.085036  | C                                       | 2.545987  | 2.758830  | -0.195388 |
| N | -1.894606 | 2.231334  | 0.064930  | C                                       | 3.184551  | 3.432225  | 0.860887  |
| C | -2.590823 | 2.603650  | -1.025718 | C                                       | 2.496247  | 3.354575  | -1.468836 |

|   |           |           |           |                                         |           |           |           |
|---|-----------|-----------|-----------|-----------------------------------------|-----------|-----------|-----------|
| C | 3.748353  | 4.689521  | 0.643803  | N                                       | -0.692334 | 2.822733  | -0.059813 |
| H | 3.237531  | 2.957132  | 1.834504  | C                                       | -1.563344 | 3.258410  | -0.988582 |
| C | 3.066952  | 4.608971  | -1.671179 | C                                       | -0.388394 | 3.646014  | 0.963169  |
| H | 2.018337  | 2.817896  | -2.281636 | C                                       | -2.152958 | 4.518620  | -0.931680 |
| C | 3.692028  | 5.283712  | -0.618454 | H                                       | -1.782016 | 2.565658  | -1.791971 |
| H | 4.239619  | 5.201863  | 1.466379  | C                                       | -0.926204 | 4.921975  | 1.087416  |
| H | 3.025482  | 5.060068  | -2.658702 | H                                       | 0.303949  | 3.257839  | 1.700235  |
| H | 4.136894  | 6.260667  | -0.783285 | C                                       | -1.827111 | 5.369373  | 0.121876  |
| C | 0.709067  | -2.236032 | -0.085410 | H                                       | -2.853136 | 4.816352  | -1.704565 |
| C | 0.160314  | -2.857649 | 1.050696  | H                                       | -0.639186 | 5.544933  | 1.927473  |
| C | 0.631241  | -2.882179 | -1.332706 | H                                       | -2.266807 | 6.360024  | 0.191150  |
| C | -0.439958 | -4.110717 | 0.936562  | N                                       | 3.831359  | -2.382476 | 0.256691  |
| H | 0.199012  | -2.340803 | 2.003151  | C                                       | 4.379604  | -3.026425 | -0.791188 |
| C | 0.030624  | -4.135395 | -1.431271 | C                                       | 3.665814  | -3.069882 | 1.404232  |
| H | 1.030589  | -2.382394 | -2.208668 | C                                       | 4.785390  | -4.356521 | -0.729690 |
| C | -0.506369 | -4.756103 | -0.300197 | H                                       | 4.501997  | -2.442681 | -1.695829 |
| H | -0.862346 | -4.581660 | 1.819938  | C                                       | 4.042997  | -4.400960 | 1.547075  |
| H | -0.022070 | -4.626509 | -2.399139 | H                                       | 3.230225  | -2.521865 | 2.231229  |
| H | -0.978568 | -5.730585 | -0.383469 | C                                       | 4.615452  | -5.059834 | 0.460752  |
| C | -4.118610 | -2.093831 | -0.373833 | H                                       | 5.226741  | -4.821475 | -1.604596 |
| C | -4.832838 | -2.190315 | 0.829866  | H                                       | 3.887954  | -4.901980 | 2.496346  |
| C | -4.317866 | -3.042395 | -1.385960 | H                                       | 4.922956  | -6.098251 | 0.540963  |
| C | -5.766459 | -3.211749 | 0.994241  | Cl                                      | 4.244663  | 0.112080  | -1.733693 |
| H | -4.643777 | -1.484047 | 1.630336  |                                         |           |           |           |
| C | -5.281888 | -4.035400 | -1.227289 | <b>IM9</b>                              |           |           |           |
| H | -3.712742 | -2.980544 | -2.284929 | B3LYP/BS1 SCF energy: -4609.522200 a.u. |           |           |           |
| C | -6.006558 | -4.125195 | -0.035761 | M06-L/BS2 SCF energy in solution:       |           |           |           |
| H | -6.310697 | -3.292797 | 1.930795  | -4609.735999 a.u.                       |           |           |           |
| H | -5.452339 | -4.753212 | -2.024465 | M06-L/BS2 Free energy in solution:      |           |           |           |
| H | -6.742553 | -4.912816 | 0.096360  | -4609.4276 a.u.                         |           |           |           |
| C | -4.302602 | 0.717029  | 0.090129  |                                         |           |           |           |
| C | -4.248027 | 1.563086  | 1.206098  | Ti                                      | -0.822505 | -1.149583 | -0.142101 |
| C | -5.445570 | 0.693554  | -0.722077 | Ti                                      | 0.822586  | 1.149431  | 0.141668  |
| C | -5.360702 | 2.333046  | 1.541270  | Cl                                      | -0.791423 | -2.537399 | 1.664692  |
| H | -3.340806 | 1.587812  | 1.801450  | Cl                                      | -0.970545 | -1.984352 | -2.261857 |
| C | -6.539172 | 1.493571  | -0.394857 | Cl                                      | 0.970839  | 1.983488  | 2.261683  |
| H | -5.468297 | 0.062544  | -1.604271 | Cl                                      | 0.791292  | 2.537371  | -1.665009 |
| C | -6.506913 | 2.304871  | 0.742189  | N                                       | -1.076042 | 0.674166  | 0.080782  |
| H | -5.326918 | 2.967460  | 2.422457  | N                                       | 1.076068  | -0.674349 | -0.081198 |
| H | -7.420903 | 1.479475  | -1.029249 | C                                       | -2.114509 | 1.618007  | -0.052706 |
| H | -7.365654 | 2.918692  | 0.997595  | C                                       | -2.750794 | 1.811745  | -1.291963 |

|   |           |           |           |                                         |           |           |           |
|---|-----------|-----------|-----------|-----------------------------------------|-----------|-----------|-----------|
| C | -2.525378 | 2.374530  | 1.058621  | H                                       | 6.997216  | 1.590474  | -0.613510 |
| C | -3.785745 | 2.736120  | -1.407161 |                                         |           |           |           |
| H | -2.411284 | 1.244394  | -2.152114 | <b>IM10</b>                             |           |           |           |
| C | -3.565281 | 3.294790  | 0.930333  | B3LYP/BS1 SCF energy: -5106.124883 a.u. |           |           |           |
| H | -2.018671 | 2.235585  | 2.007572  | M06-L/BS2 SCF energy in solution:       |           |           |           |
| C | -4.200504 | 3.479420  | -0.298724 | -5106.417935 a.u.                       |           |           |           |
| H | -4.267286 | 2.879774  | -2.370188 | M06-L/BS2 Free energy in solution:      |           |           |           |
| H | -3.873860 | 3.873856  | 1.796046  | -5105.9436 a.u.                         |           |           |           |
| H | -5.006112 | 4.200939  | -0.395247 |                                         |           |           |           |
| C | 2.114488  | -1.618124 | 0.053422  | Ti                                      | -1.422427 | -0.073010 | 0.037567  |
| C | 2.525623  | -2.375563 | -1.057167 | Ti                                      | 1.422322  | 0.073144  | 0.037612  |
| C | 2.750491  | -1.810778 | 1.292992  | Cl                                      | -1.869566 | 0.010376  | 2.360056  |
| C | 3.565531  | -3.295692 | -0.927858 | Cl                                      | -1.858817 | -0.075911 | -2.285240 |
| H | 2.019125  | -2.237432 | -2.006351 | Cl                                      | 1.869354  | -0.010263 | 2.360138  |
| C | 3.785426  | -2.735032 | 1.409215  | Cl                                      | 1.858691  | 0.076210  | -2.285239 |
| H | 2.410799  | -1.242670 | 2.152573  | N                                       | -0.020039 | 1.267308  | 0.033956  |
| C | 4.200468  | -3.479260 | 0.301490  | N                                       | 0.019963  | -1.267186 | 0.033871  |
| H | 3.874320  | -3.875477 | -1.793016 | C                                       | -0.227696 | 2.653416  | -0.061415 |
| H | 4.266754  | -2.877860 | 2.372471  | C                                       | 0.047609  | 3.331004  | -1.265026 |
| H | 5.006090  | -4.200656 | 0.398809  | C                                       | -0.711235 | 3.378481  | 1.044357  |
| N | -3.167683 | -1.346924 | 0.034979  | C                                       | -0.158072 | 4.707186  | -1.350995 |
| C | -3.718837 | -0.973516 | 1.206492  | H                                       | 0.418190  | 2.761578  | -2.110607 |
| C | -3.985009 | -1.803379 | -0.931293 | C                                       | -0.906012 | 4.755584  | 0.943139  |
| C | -5.084739 | -1.042569 | 1.453000  | H                                       | -0.928462 | 2.844623  | 1.963600  |
| H | -3.033436 | -0.617041 | 1.966201  | C                                       | -0.633550 | 5.426896  | -0.251193 |
| C | -5.363121 | -1.907402 | -0.763767 | H                                       | 0.057571  | 5.220064  | -2.284523 |
| H | -3.506417 | -2.094725 | -1.858802 | H                                       | -1.276969 | 5.305289  | 1.804056  |
| C | -5.926109 | -1.520011 | 0.449564  | H                                       | -0.789472 | 6.499249  | -0.324607 |
| H | -5.472371 | -0.727576 | 2.415376  | C                                       | 0.227640  | -2.653297 | -0.061416 |
| H | -5.973339 | -2.286719 | -1.576038 | C                                       | -0.047600 | -3.330940 | -1.265010 |
| H | -6.997525 | -1.588921 | 0.611263  | C                                       | 0.711128  | -3.378316 | 1.044411  |
| N | 3.167723  | 1.346752  | -0.035682 | C                                       | 0.158090  | -4.707127 | -1.350914 |
| C | 3.985088  | 1.804722  | 0.929838  | H                                       | -0.418148 | -2.761558 | -2.110635 |
| C | 3.718718  | 0.972413  | -1.206975 | C                                       | 0.905913  | -4.755421 | 0.943258  |
| C | 5.363087  | 1.909367  | 0.761754  | H                                       | 0.928309  | -2.844420 | 1.963643  |
| H | 3.506654  | 2.096723  | 1.857218  | C                                       | 0.633516  | -5.426787 | -0.251060 |
| C | 5.084487  | 1.042068  | -1.454024 | H                                       | -0.057505 | -5.220042 | -2.284432 |
| H | 3.033307  | 0.614595  | -1.966036 | H                                       | 1.276830  | -5.305089 | 1.804215  |
| C | 5.925897  | 1.521074  | -0.451375 | H                                       | 0.789448  | -6.499143 | -0.324415 |
| H | 5.973357  | 2.289832  | 1.573447  | N                                       | -3.436099 | 1.334743  | -0.022282 |
| H | 5.471995  | 0.726324  | -2.416203 | C                                       | -4.454013 | 1.168787  | 0.842372  |

|   |           |           |           |                                         |           |           |           |
|---|-----------|-----------|-----------|-----------------------------------------|-----------|-----------|-----------|
| C | -3.543902 | 2.316547  | -0.936811 | H                                       | 5.341454  | 4.994178  | 0.292416  |
| C | -5.604251 | 1.952681  | 0.817852  |                                         |           |           |           |
| H | -4.319546 | 0.391738  | 1.584975  | <b>TS8</b>                              |           |           |           |
| C | -4.648220 | 3.160430  | -1.014872 | B3LYP/BS1 SCF energy: -5106.077342 a.u. |           |           |           |
| H | -2.716464 | 2.418286  | -1.627797 | M06-L/BS2 SCF energy in solution:       |           |           |           |
| C | -5.703877 | 2.972963  | -0.125774 | -5106.362600 a.u.                       |           |           |           |
| H | -6.396143 | 1.764769  | 1.534980  | M06-L/BS2 Free energy in solution:      |           |           |           |
| H | -4.670517 | 3.943289  | -1.765025 | -5105.8966 a.u.                         |           |           |           |
| H | -6.583440 | 3.608881  | -0.165617 |                                         |           |           |           |
| N | -2.969031 | -1.924157 | 0.108710  | Ti                                      | -2.061689 | -0.416998 | -0.005435 |
| C | -3.912412 | -2.130008 | -0.829597 | Ti                                      | 2.061667  | 0.417734  | -0.004373 |
| C | -2.872035 | -2.818479 | 1.111265  | Cl                                      | -1.989487 | 0.158892  | 2.255271  |
| C | -4.788204 | -3.211711 | -0.795348 | Cl                                      | -2.037592 | 0.313076  | -2.227483 |
| H | -3.942033 | -1.404192 | -1.633675 | Cl                                      | 1.991205  | -0.155656 | 2.257247  |
| C | -3.696722 | -3.935059 | 1.209487  | Cl                                      | 2.036805  | -0.312096 | -2.226660 |
| H | -2.113775 | -2.615383 | 1.857000  | N                                       | 0.948050  | 1.689437  | -0.064537 |
| C | -4.677884 | -4.135976 | 0.241300  | N                                       | -0.947518 | -1.688281 | -0.065316 |
| H | -5.533251 | -3.321952 | -1.575956 | C                                       | 0.225603  | 2.855187  | -0.158845 |
| H | -3.564783 | -4.625982 | 2.034885  | C                                       | 0.016145  | 3.470144  | -1.413990 |
| H | -5.340635 | -4.994854 | 0.292438  | C                                       | -0.312540 | 3.464581  | 0.997331  |
| N | 3.435941  | -1.334761 | -0.022330 | C                                       | -0.692071 | 4.665633  | -1.499547 |
| C | 3.543871  | -2.316343 | -0.937080 | H                                       | 0.406859  | 2.980803  | -2.299725 |
| C | 4.453726  | -1.169021 | 0.842518  | C                                       | -1.020632 | 4.659621  | 0.894975  |
| C | 4.648201  | -3.160206 | -1.015191 | H                                       | -0.176067 | 2.971688  | 1.954097  |
| H | 2.716522  | -2.417907 | -1.628198 | C                                       | -1.211003 | 5.268925  | -0.348960 |
| C | 5.603965  | -1.952914 | 0.817976  | H                                       | -0.841901 | 5.129833  | -2.470914 |
| H | 4.319128  | -0.392163 | 1.585298  | H                                       | -1.429191 | 5.116724  | 1.792292  |
| C | 5.703729  | -2.972958 | -0.125892 | H                                       | -1.759072 | 6.204133  | -0.421622 |
| H | 4.670612  | -3.942879 | -1.765534 | C                                       | -0.225308 | -2.854207 | -0.159240 |
| H | 6.395748  | -1.765189 | 1.535274  | C                                       | -0.016206 | -3.469815 | -1.414127 |
| H | 6.583297  | -3.608868 | -0.165765 | C                                       | 0.312830  | -3.463244 | 0.997138  |
| N | 2.969198  | 1.923987  | 0.108855  | C                                       | 0.691611  | -4.665573 | -1.499225 |
| C | 3.912709  | 2.129510  | -0.829398 | H                                       | -0.406901 | -2.980764 | -2.300032 |
| C | 2.872304  | 2.818446  | 1.111291  | C                                       | 1.020521  | -4.658565 | 0.895242  |
| C | 4.788734  | 3.211022  | -0.795201 | H                                       | 0.176650  | -2.969885 | 1.953713  |
| H | 3.942198  | 1.403581  | -1.633377 | C                                       | 1.210510  | -5.268510 | -0.348433 |
| C | 3.697228  | 3.934858  | 1.209450  | H                                       | 0.841149  | -5.130276 | -2.470397 |
| H | 2.113928  | 2.615600  | 1.856979  | H                                       | 1.429058  | -5.115380 | 1.792716  |
| C | 4.678520  | 4.135438  | 0.241325  | H                                       | 1.758259  | -6.203933 | -0.420743 |
| H | 5.533877  | 3.321010  | -1.575754 | N                                       | -3.985821 | 1.253548  | 0.113681  |
| H | 3.565368  | 4.625913  | 2.034750  | C                                       | -4.941345 | 1.103291  | 1.048054  |

|   |           |           |           |                                         |           |           |           |
|---|-----------|-----------|-----------|-----------------------------------------|-----------|-----------|-----------|
| C | -4.007793 | 2.374549  | -0.627086 | H                                       | 6.518641  | 4.515520  | -0.100411 |
| C | -5.954016 | 2.033288  | 1.260405  |                                         |           |           |           |
| H | -4.874114 | 0.208811  | 1.657614  | <b>TS9</b>                              |           |           |           |
| C | -4.972356 | 3.368924  | -0.468070 | B3LYP/BS1 SCF energy: -2553.011459 a.u. |           |           |           |
| H | -3.223780 | 2.464880  | -1.370378 | M06-L/BS2 SCF energy in solution:       |           |           |           |
| C | -5.969228 | 3.194008  | 0.487393  | -2553.166857 a.u.                       |           |           |           |
| H | -6.703048 | 1.851763  | 2.023981  | M06-L/BS2 Free energy in solution:      |           |           |           |
| H | -4.929967 | 4.258927  | -1.086493 | -2552.9430 a.u.                         |           |           |           |
| H | -6.738730 | 3.946696  | 0.632696  |                                         |           |           |           |
| N | -3.728031 | -1.835346 | -0.023852 | Ti                                      | -0.083153 | -0.376342 | -0.040593 |
| C | -4.604328 | -1.882946 | -1.046337 | N                                       | -0.238220 | 1.804605  | -0.073265 |
| C | -3.835898 | -2.738833 | 0.971196  | C                                       | -0.330489 | 4.590076  | -0.104584 |
| C | -5.616747 | -2.834829 | -1.108849 | C                                       | -0.710688 | 2.464373  | -1.151761 |
| H | -4.465284 | -1.139900 | -1.823640 | C                                       | 0.191809  | 2.518693  | 0.989555  |
| C | -4.828876 | -3.711330 | 0.982343  | C                                       | 0.159509  | 3.907736  | 1.009286  |
| H | -3.099831 | -2.660921 | 1.763270  | C                                       | -0.772232 | 3.853316  | -1.201986 |
| C | -5.734848 | -3.764002 | -0.076793 | H                                       | -1.026427 | 1.844954  | -1.984020 |
| H | -6.294554 | -2.839623 | -1.955218 | H                                       | 0.557252  | 1.941134  | 1.830951  |
| H | -4.878764 | -4.415172 | 1.805599  | H                                       | 0.516798  | 4.437327  | 1.885511  |
| H | -6.515703 | -4.517994 | -0.098504 | H                                       | -1.158380 | 4.338265  | -2.091742 |
| N | 3.983919  | -1.254908 | 0.114214  | H                                       | -0.364666 | 5.675290  | -0.116928 |
| C | 4.005296  | -2.375484 | -0.627213 | N                                       | -2.493341 | -1.001621 | 0.022492  |
| C | 4.939866  | -1.105459 | 1.048297  | C                                       | -5.201579 | -1.694063 | 0.188420  |
| C | 4.969644  | -3.370220 | -0.469160 | C                                       | -3.014797 | -1.962209 | -0.761829 |
| H | 3.220967  | -2.465175 | -1.370244 | C                                       | -3.317903 | -0.386729 | 0.890745  |
| C | 5.952381  | -2.035854 | 1.259674  | C                                       | -4.673147 | -0.687317 | 0.995109  |
| H | 4.873078  | -0.211346 | 1.658429  | C                                       | -4.352100 | -2.347965 | -0.701376 |
| C | 5.966968  | -3.196125 | 0.485981  | H                                       | -2.332277 | -2.417281 | -1.470650 |
| H | 4.926736  | -4.259859 | -1.088070 | H                                       | -2.860198 | 0.353547  | 1.537165  |
| H | 6.701780  | -1.854967 | 2.023042  | H                                       | -5.291232 | -0.148031 | 1.705080  |
| H | 6.736327  | -3.949106 | 0.630527  | H                                       | -4.711834 | -3.141043 | -1.348230 |
| N | 3.729072  | 1.834867  | -0.024073 | H                                       | -6.251660 | -1.963752 | 0.253771  |
| C | 4.604238  | 1.882403  | -1.047529 | N                                       | 1.587028  | -0.522678 | -0.040499 |
| C | 3.838758  | 2.737719  | 0.971365  | C                                       | 2.940521  | -0.772100 | -0.007379 |
| C | 5.617308  | 2.833559  | -1.110643 | C                                       | 5.707799  | -1.262704 | 0.067977  |
| H | 4.463733  | 1.139920  | -1.825106 | C                                       | 3.565771  | -1.164467 | 1.196050  |
| C | 4.832439  | 3.709503  | 0.981894  | C                                       | 3.724461  | -0.632479 | -1.172652 |
| H | 3.103618  | 2.659811  | 1.764301  | C                                       | 5.094510  | -0.875913 | -1.127464 |
| C | 5.737258  | 3.762089  | -0.078229 | C                                       | 4.936476  | -1.406123 | 1.225404  |
| H | 6.294170  | 2.838299  | -1.957769 | H                                       | 2.954734  | -1.273462 | 2.086533  |
| H | 4.883771  | 4.412854  | 1.805481  | H                                       | 3.235814  | -0.340349 | -2.096659 |

|    |           |           |           |
|----|-----------|-----------|-----------|
| H  | 5.687992  | -0.766473 | -2.031340 |
| H  | 5.406943  | -1.709239 | 2.157060  |
| H  | 6.776807  | -1.452961 | 0.096780  |
| Cl | -0.466762 | -0.769331 | -2.345799 |
| Cl | -0.414774 | -0.637333 | 2.293893  |

**TS10**

B3LYP/BS1 SCF energy: -2772.763253 a.u.  
M06-L/BS2 SCF energy in solution:  
-2772.914225 a.u.  
M06-L/BS2 Free energy in solution:  
-2772.526055 a.u.

|    |           |           |           |
|----|-----------|-----------|-----------|
| Ti | -0.685008 | 0.589067  | 0.267789  |
| N  | -2.472092 | -0.490184 | -0.084255 |
| C  | -4.893283 | -1.840035 | -0.644867 |
| C  | -3.494774 | -0.534047 | 0.817709  |
| C  | -2.682508 | -1.120844 | -1.276857 |
| C  | -3.857538 | -1.791994 | -1.580708 |
| C  | -4.692860 | -1.189067 | 0.574413  |
| H  | -3.319215 | -0.017735 | 1.753998  |
| H  | -1.865909 | -1.070264 | -1.986953 |
| H  | -3.950391 | -2.272610 | -2.549150 |
| H  | -5.458090 | -1.184220 | 1.343714  |
| H  | -5.820610 | -2.360553 | -0.858670 |
| C  | 3.330775  | -0.258034 | -0.049196 |
| C  | 5.794806  | 1.020404  | -0.469365 |
| C  | 4.524767  | -0.994811 | -0.040635 |
| C  | 3.384003  | 1.126632  | -0.260437 |
| C  | 4.610300  | 1.758591  | -0.459667 |
| C  | 5.744972  | -0.359302 | -0.263208 |
| H  | 4.491938  | -2.059415 | 0.164280  |
| H  | 2.461585  | 1.693135  | -0.295029 |
| H  | 4.636284  | 2.831927  | -0.623671 |
| H  | 6.660853  | -0.943122 | -0.255088 |
| H  | 6.747152  | 1.515399  | -0.632984 |
| Cl | -1.199925 | 1.727371  | 2.225378  |
| Cl | 0.168895  | 0.769080  | -1.892106 |
| C  | 0.108158  | -1.500187 | 1.156350  |
| N  | 2.095110  | -0.911675 | 0.194479  |
| C  | 1.156932  | -0.520514 | 1.196463  |

|   |           |           |           |
|---|-----------|-----------|-----------|
| C | 1.725157  | 0.104317  | 2.455731  |
| H | 0.942545  | 0.255901  | 3.196936  |
| H | 2.195945  | 1.073610  | 2.273803  |
| H | 2.489086  | -0.557494 | 2.885474  |
| C | -0.749232 | -1.900637 | 2.333599  |
| H | -0.243191 | -2.676095 | 2.926272  |
| H | -1.707522 | -2.318605 | 2.010968  |
| H | -0.961052 | -1.063054 | 3.001223  |
| C | 1.618569  | -2.030446 | -0.482227 |
| C | 0.428650  | -2.424712 | 0.084349  |
| C | 2.291834  | -2.553097 | -1.712268 |
| H | 2.547097  | -1.731898 | -2.390003 |
| H | 1.622829  | -3.233018 | -2.243489 |
| H | 3.215838  | -3.101148 | -1.498639 |
| C | -0.374139 | -3.644463 | -0.267731 |
| H | -0.191879 | -4.464805 | 0.440196  |
| H | -0.126863 | -4.022789 | -1.263873 |
| H | -1.449160 | -3.444522 | -0.249285 |
| C | -1.488454 | 3.366918  | -0.645867 |
| C | -2.558429 | 2.853827  | -0.900504 |
| C | -0.246727 | 4.093962  | -0.387292 |
| H | -0.360028 | 5.149930  | -0.657209 |
| H | 0.023917  | 4.044569  | 0.672477  |
| H | 0.575641  | 3.682013  | -0.981665 |
| C | -3.881165 | 2.345215  | -1.253879 |
| H | -3.816506 | 1.533673  | -1.986048 |
| H | -4.413972 | 1.964670  | -0.376511 |
| H | -4.488654 | 3.144352  | -1.693071 |

**IM11**

B3LYP/BS1 SCF energy: -2174.315285 a.u.  
M06-L/BS2 SCF energy in solution:  
-2174.393315 a.u.  
M06-L/BS2 Free energy in solution:  
-2174.262743 a.u.

|    |           |           |           |
|----|-----------|-----------|-----------|
| Ti | -0.885601 | -0.415979 | 0.000669  |
| N  | 1.330195  | -0.083966 | 0.002671  |
| C  | 4.095421  | 0.310188  | 0.002675  |
| C  | 2.013064  | 0.027352  | 1.160345  |
| C  | 2.018353  | -0.009612 | -1.154846 |



|    |           |           |           |
|----|-----------|-----------|-----------|
| C  | 3.394157  | 0.187868  | -1.195718 |
| C  | 3.388661  | 0.226328  | 1.201161  |
| H  | 1.427798  | -0.055141 | 2.069601  |
| H  | 1.437197  | -0.120504 | -2.063740 |
| H  | 3.898390  | 0.239197  | -2.154332 |
| H  | 3.888488  | 0.308479  | 2.159940  |
| H  | 5.169889  | 0.464552  | 0.002667  |
| Cl | -1.079072 | -1.483085 | 1.999810  |
| Cl | -1.085976 | -1.516732 | -1.978679 |
| C  | -3.717597 | 1.358397  | 0.010435  |
| H  | -4.208288 | 0.925802  | 0.889289  |
| H  | -3.889257 | 2.442244  | 0.016804  |
| H  | -4.218717 | 0.935555  | -0.867459 |
| C  | -0.458821 | 2.932141  | -0.046558 |
| H  | 0.122399  | 3.075130  | -0.965489 |
| H  | -1.202744 | 3.736800  | 0.009784  |
| H  | 0.241980  | 3.059268  | 0.786946  |
| C  | -2.266964 | 1.011304  | -0.001789 |
| C  | -1.081186 | 1.576834  | -0.021813 |

|   |           |           |           |
|---|-----------|-----------|-----------|
| C | 2.869946  | -0.082109 | -0.060874 |
| C | 2.410036  | -1.175197 | 0.358044  |
| C | 2.607814  | -2.576199 | 0.795710  |
| H | 2.109885  | -3.257463 | 0.099842  |
| H | 2.169152  | -2.726542 | 1.787149  |
| H | 3.673201  | -2.830481 | 0.839126  |
| C | 4.059782  | 0.634705  | -0.584899 |
| H | 4.444098  | 1.382620  | 0.112312  |
| H | 3.853283  | 1.127899  | -1.538596 |
| H | 4.847679  | -0.107969 | -0.749114 |
| C | 0.348489  | 1.536834  | -0.948172 |
| C | 1.416219  | 1.673909  | -0.209906 |
| C | -0.581880 | 2.414092  | -1.715633 |
| H | -1.629980 | 2.154633  | -1.543408 |
| H | -0.397754 | 2.272635  | -2.787547 |
| H | -0.440900 | 3.479238  | -1.489381 |
| C | 2.228694  | 2.806071  | 0.330798  |
| H | 2.728855  | 2.554377  | 1.269580  |
| H | 1.552874  | 3.648412  | 0.522177  |
| H | 2.982782  | 3.159060  | -0.380147 |

### TS11

B3LYP/BS1 SCF energy: -2330.289206 a.u.  
M06-L/BS2 SCF energy in solution:  
-2330.390868 a.u.  
M06-L/BS2 Free energy in solution:  
-2330.176019 a.u.

|    |           |           |           |
|----|-----------|-----------|-----------|
| Ti | 0.523793  | -0.226811 | 0.011973  |
| N  | -1.865216 | -0.172025 | 0.049844  |
| C  | -4.653680 | 0.074654  | 0.172741  |
| C  | -2.667398 | -0.992399 | -0.652572 |
| C  | -2.450697 | 0.772049  | 0.813979  |
| C  | -3.829104 | 0.933787  | 0.897791  |
| C  | -4.057607 | -0.907283 | -0.613222 |
| H  | -2.163711 | -1.731053 | -1.264439 |
| H  | -1.781464 | 1.403008  | 1.386680  |
| H  | -4.239423 | 1.715277  | 1.528067  |
| H  | -4.650885 | -1.604117 | -1.195369 |
| H  | -5.734351 | 0.168835  | 0.221701  |
| Cl | 0.274080  | -1.828348 | -1.680902 |
| Cl | 0.196864  | -0.247644 | 2.331864  |

### IM12

B3LYP/BS1 SCF energy: -2330.330785 a.u.  
M06-L/BS2 SCF energy in solution:  
-2330.420565 a.u.  
M06-L/BS2 Free energy in solution:  
-2330.205642 a.u.

|    |           |           |           |
|----|-----------|-----------|-----------|
| Ti | -0.332719 | -0.586018 | -0.001180 |
| N  | 2.098160  | -0.072755 | 0.005030  |
| C  | 4.810677  | 0.616586  | 0.025174  |
| C  | 2.739735  | 0.192322  | 1.158119  |
| C  | 2.805330  | -0.000314 | -1.137610 |
| C  | 4.155314  | 0.338874  | -1.172685 |
| C  | 4.086443  | 0.540046  | 1.213395  |
| H  | 2.146868  | 0.106693  | 2.062309  |
| H  | 2.263461  | -0.235875 | -2.047164 |
| H  | 4.674673  | 0.378044  | -2.124089 |
| H  | 4.550801  | 0.740326  | 2.172923  |
| H  | 5.863378  | 0.882655  | 0.033183  |
| Cl | -0.003720 | -1.502134 | 2.055610  |

|    |           |           |           |    |           |           |           |
|----|-----------|-----------|-----------|----|-----------|-----------|-----------|
| Cl | -0.001789 | -1.604876 | -2.007105 | H  | -4.880500 | 0.381219  | -0.417352 |
| C  | -2.947950 | 0.444677  | -0.000577 | H  | -4.734883 | -1.299693 | -0.930567 |
| C  | -2.370380 | -0.790137 | 0.016312  | H  | -4.799535 | -0.912813 | 0.783793  |
| C  | -3.069070 | -2.117553 | 0.059154  | C  | -2.818638 | -2.969078 | 0.248273  |
| H  | -2.761175 | -2.679994 | 0.949661  | H  | -3.607115 | -2.921219 | 1.008763  |
| H  | -2.781399 | -2.726481 | -0.807160 | H  | -3.308957 | -3.252405 | -0.691718 |
| H  | -4.162728 | -2.048469 | 0.070033  | H  | -2.143939 | -3.780885 | 0.520103  |
| C  | -4.442188 | 0.687148  | 0.020578  | C  | 0.166311  | -2.726330 | 0.290086  |
| H  | -4.768978 | 1.258763  | -0.856163 | H  | 1.206925  | -2.467348 | 0.489152  |
| H  | -4.742631 | 1.264135  | 0.903485  | H  | -0.151800 | -3.429582 | 1.070949  |
| H  | -5.003108 | -0.247143 | 0.032126  | H  | 0.156971  | -3.280396 | -0.658684 |
| C  | -0.684491 | 1.432899  | -0.060810 | C  | 0.337723  | -1.071674 | 2.903972  |
| C  | -2.040484 | 1.633153  | -0.041284 | H  | 1.320974  | -1.370343 | 2.531803  |
| C  | 0.351292  | 2.528332  | -0.122058 | H  | 0.474247  | -0.634095 | 3.899869  |
| H  | 1.027011  | 2.388426  | -0.973153 | H  | -0.268309 | -1.976206 | 3.005402  |
| H  | 0.982143  | 2.533028  | 0.774813  | C  | -1.371256 | 2.347185  | 2.237644  |
| H  | -0.082155 | 3.529070  | -0.217560 | H  | -2.457234 | 2.369687  | 2.104477  |
| C  | -2.697742 | 2.997409  | -0.060138 | H  | -1.149711 | 2.526468  | 3.296460  |
| H  | -3.338954 | 3.112202  | -0.942053 | H  | -0.939710 | 3.157234  | 1.646429  |
| H  | -1.976371 | 3.813391  | -0.065835 | Cl | -0.073406 | -0.085015 | -2.708296 |
| H  | -3.343410 | 3.131421  | 0.815387  | Cl | 0.666579  | 2.627957  | -0.437003 |

### TS12

B3LYP/BS1 SCF energy: -2486.301533 a.u.  
M06-L/BS2 SCF energy in solution:  
-2486.421423 a.u.  
M06-L/BS2 Free energy in solution:  
-2486.123572 a.u.

|    |           |           |           |
|----|-----------|-----------|-----------|
| Ti | -0.199215 | 0.438047  | -0.476228 |
| C  | -0.827735 | 1.039699  | 1.820850  |
| C  | -2.216809 | 0.724607  | -0.408200 |
| C  | -2.893688 | -0.458788 | -0.156956 |
| C  | -0.312247 | -0.073062 | 2.030451  |
| C  | -2.103112 | -1.639930 | 0.107906  |
| C  | -0.718033 | -1.509600 | 0.165759  |
| C  | -2.911000 | 2.012036  | -0.777965 |
| H  | -3.277672 | 1.954860  | -1.811962 |
| H  | -3.777006 | 2.231973  | -0.139124 |
| H  | -2.230667 | 2.864891  | -0.731934 |
| C  | -4.404110 | -0.570618 | -0.181210 |

|   |          |           |           |
|---|----------|-----------|-----------|
| N | 2.158581 | -0.132450 | -0.123187 |
| C | 2.858656 | 0.410465  | 0.888764  |
| C | 2.828398 | -0.858650 | -1.035738 |
| C | 4.231223 | 0.237860  | 1.037819  |
| H | 2.290598 | 1.013940  | 1.588563  |
| C | 4.202499 | -1.076557 | -0.966006 |
| H | 2.235322 | -1.259571 | -1.850652 |
| C | 4.918867 | -0.520859 | 0.091432  |
| H | 4.744913 | 0.700260  | 1.873745  |
| H | 4.692218 | -1.666514 | -1.733144 |
| H | 5.991323 | -0.669595 | 0.173751  |

### IM13

B3LYP/BS1 SCF energy: -2486.440071 a.u.  
M06-L/BS2 SCF energy in solution:  
-2486.564667 a.u.  
M06-L/BS2 Free energy in solution:  
-2486.255592 a.u.

|    |          |           |           |
|----|----------|-----------|-----------|
| Ti | 0.342239 | -0.079758 | -0.595857 |
|----|----------|-----------|-----------|

|    |           |           |           |    |           |           |           |
|----|-----------|-----------|-----------|----|-----------|-----------|-----------|
| C  | 2.518104  | -0.445820 | 0.250163  | H  | -4.493266 | 2.058510  | 0.177446  |
| C  | 2.115679  | 0.953480  | 0.094883  | H  | -5.777648 | -0.099405 | 0.061063  |
| C  | 1.182970  | 1.499085  | 1.085911  |    |           |           |           |
| C  | 1.699116  | -1.314954 | 0.970941  |    |           |           |           |
| C  | 0.349469  | 0.625750  | 1.772682  |    |           |           |           |
| C  | 0.439671  | -0.818747 | 1.503275  |    |           |           |           |
| C  | 2.992325  | 1.898393  | -0.698573 |    |           |           |           |
| H  | 2.417772  | 2.751813  | -1.057861 |    |           |           |           |
| H  | 3.836004  | 2.274559  | -0.101822 |    |           |           |           |
| H  | 3.406745  | 1.410261  | -1.581529 |    |           |           |           |
| C  | 1.121320  | 3.002195  | 1.221374  | Ti | 0.517957  | -0.740820 | 0.178691  |
| H  | 2.118410  | 3.408126  | 1.419756  | N  | 1.311627  | 1.175010  | -0.017449 |
| H  | 0.766372  | 3.453363  | 0.288616  | C  | 2.390707  | 3.770853  | -0.350461 |
| H  | 0.464933  | 3.333016  | 2.025115  | C  | 2.179031  | 1.716346  | 0.891589  |
| C  | -0.672720 | 1.078513  | 2.790695  | C  | 1.005850  | 1.947519  | -1.104874 |
| H  | -0.500973 | 0.569194  | 3.745185  | C  | 1.520161  | 3.221542  | -1.293750 |
| H  | -0.636174 | 2.150189  | 2.979134  | C  | 2.719931  | 2.984590  | 0.758472  |
| H  | -1.693960 | 0.835144  | 2.481543  | H  | 2.425133  | 1.087443  | 1.739249  |
| C  | -0.469845 | -1.769738 | 2.252713  | H  | 0.330551  | 1.502524  | -1.825143 |
| H  | -0.538072 | -2.735268 | 1.747599  | H  | 1.230257  | 3.774712  | -2.181267 |
| H  | -0.117169 | -1.963860 | 3.276575  | H  | 3.396424  | 3.347416  | 1.525498  |
| H  | -1.484996 | -1.378021 | 2.332144  | H  | 2.801809  | 4.766576  | -0.475964 |
| C  | 1.992503  | -2.791941 | 1.106554  | Cl | 1.646089  | -1.616651 | 2.007773  |
| H  | 1.379382  | -3.377678 | 0.412588  | Cl | -0.129159 | -1.228049 | -1.998556 |
| H  | 3.034913  | -3.029278 | 0.901042  | C  | -1.320554 | 0.493850  | 1.435723  |
| H  | 1.772020  | -3.134611 | 2.121036  | C  | -1.693932 | -0.872269 | 1.185508  |
| C  | 3.751142  | -0.905780 | -0.494696 | C  | -1.639245 | -1.926078 | 2.295496  |
| H  | 4.606594  | -0.266951 | -0.254516 | H  | -1.057237 | -1.600092 | 3.153050  |
| H  | 4.024255  | -1.933693 | -0.264755 | H  | -1.208705 | -2.876941 | 1.972967  |
| H  | 3.596545  | -0.850829 | -1.578094 | H  | -2.658771 | -2.134468 | 2.644219  |
| Cl | -0.120530 | 1.735654  | -2.070099 | C  | -0.682598 | 0.902118  | 2.755610  |
| Cl | 0.317317  | -1.897841 | -2.043579 | H  | -1.455210 | 1.223274  | 3.468345  |
| N  | -1.911486 | -0.058667 | -0.288728 | H  | 0.002143  | 1.743790  | 2.631569  |
| C  | -2.602097 | -1.213152 | -0.355471 | H  | -0.116618 | 0.099057  | 3.221510  |
| C  | -2.604110 | 1.083378  | -0.111604 | C  | -2.697293 | 1.244297  | -0.456961 |
| C  | -3.987727 | -1.270889 | -0.238963 | C  | -1.873948 | 1.547176  | 0.622699  |
| H  | -2.013993 | -2.107003 | -0.526906 | C  | -3.215488 | 2.312755  | -1.400434 |
| C  | -3.987901 | 1.109951  | 0.032388  | H  | -3.163914 | 1.970527  | -2.437975 |
| H  | -2.020445 | 1.995420  | -0.114536 | H  | -2.638839 | 3.235333  | -1.344409 |
| C  | -4.696137 | -0.088443 | -0.034671 | H  | -4.264707 | 2.569602  | -1.202816 |
| H  | -4.492050 | -2.228164 | -0.311962 | C  | -1.601778 | 2.977019  | 1.045462  |

**TS13**

B3LYP/BS1 SCF energy: -2642.398441 a.u.  
M06-L/BS2 SCF energy in solution:  
-2642.536140 a.u.  
M06-L/BS2 Free energy in solution:  
-2642.152447 a.u.

|   |           |           |           |    |           |           |           |
|---|-----------|-----------|-----------|----|-----------|-----------|-----------|
| H | -1.939262 | 3.142084  | 2.075138  | H  | 6.870662  | 0.330305  | 0.896980  |
| H | -2.122182 | 3.704181  | 0.424872  | H  | 7.348187  | -1.659272 | -0.520115 |
| H | -0.535769 | 3.224882  | 1.020988  | Cl | 0.468434  | -0.961376 | -2.329065 |
| C | 2.755983  | -2.442998 | -0.979517 | Cl | 1.155729  | -2.877013 | 0.737405  |
| C | 3.289075  | -1.368453 | -1.166080 | C  | 1.155860  | 2.127400  | 0.668402  |
| C | 2.211848  | -3.790265 | -0.817837 | N  | 2.381192  | 0.143028  | -0.019169 |
| H | 2.919074  | -4.534543 | -1.200717 | C  | 2.084672  | 1.500147  | -0.147255 |
| H | 2.024400  | -4.013663 | 0.237207  | C  | 2.770245  | 2.247699  | -1.278331 |
| H | 1.274041  | -3.900212 | -1.372251 | H  | 2.053076  | 2.471377  | -2.076700 |
| C | 4.026122  | -0.142530 | -1.462515 | H  | 3.565557  | 1.644856  | -1.714968 |
| H | 3.448410  | 0.524888  | -2.110340 | H  | 3.202222  | 3.195877  | -0.944822 |
| H | 4.276663  | 0.409433  | -0.551027 | C  | 0.835394  | 3.587339  | 0.405140  |
| H | 4.963412  | -0.381042 | -1.977463 | H  | 0.884971  | 3.830921  | -0.657240 |
| C | -3.085703 | -0.113883 | -0.700802 | H  | 1.533909  | 4.257877  | 0.924252  |
| C | -4.038322 | -0.423196 | -1.836441 | H  | -0.170299 | 3.839542  | 0.748285  |
| H | -3.493200 | -0.605737 | -2.772818 | C  | 0.320897  | 0.157916  | 1.864231  |
| H | -4.635545 | -1.313556 | -1.633556 | C  | 0.550098  | 1.503330  | 1.851141  |
| H | -4.737413 | 0.394835  | -2.020601 | C  | -0.242674 | -0.622996 | 3.021475  |
| C | -3.002672 | -2.573771 | -0.199365 | H  | 0.499168  | -1.334638 | 3.402202  |
| H | -2.341914 | -3.294123 | 0.282638  | H  | -1.097038 | -1.232532 | 2.698210  |
| H | -4.021229 | -2.786788 | 0.151476  | H  | -0.580364 | -0.002895 | 3.860355  |
| H | -2.974215 | -2.780404 | -1.271796 | C  | 0.234326  | 2.436360  | 3.010579  |
| C | -2.595812 | -1.142306 | 0.089092  | H  | 0.079896  | 1.884144  | 3.938251  |

### IM3NN

B3LYP/BS1 SCF energy: -2941.247623 a.u.

M06-L/BS2 SCF energy in solution:  
-2941.419257 a.u.

M06-L/BS2 Free energy in solution:  
-2941.018785 a.u.

|    |          |           |           |   |           |           |           |
|----|----------|-----------|-----------|---|-----------|-----------|-----------|
| Ti | 0.723961 | -0.784567 | 0.056023  | H | 1.046352  | 3.150690  | 3.184319  |
| C  | 3.707940 | -0.330383 | -0.182752 | N | -1.374102 | -0.172765 | -0.151806 |
| C  | 6.332636 | -1.286594 | -0.426449 | N | -1.983331 | -1.230407 | 0.141117  |
| C  | 4.761676 | 0.307339  | 0.492932  | C | -2.009205 | 1.088788  | -0.454312 |
| C  | 3.979220 | -1.448581 | -0.984852 | C | -3.110654 | 3.587827  | -0.978728 |
| C  | 5.285782 | -1.921205 | -1.097241 | C | -1.650235 | 1.764567  | -1.623917 |
| C  | 6.064567 | -0.168562 | 0.366447  | C | -2.889608 | 1.662598  | 0.470408  |
| H  | 4.543924 | 1.164123  | 1.123341  | C | -3.433508 | 2.917002  | 0.204190  |
| H  | 3.169883 | -1.926056 | -1.525047 | C | -2.222969 | 3.009327  | -1.887844 |
| H  | 5.484722 | -2.787304 | -1.721496 | H | -0.956644 | 1.296285  | -2.313614 |
|    |          |           |           | H | -3.132548 | 1.134908  | 1.385995  |
|    |          |           |           | H | -4.110527 | 3.370172  | 0.921791  |
|    |          |           |           | H | -1.967122 | 3.529431  | -2.805837 |
|    |          |           |           | H | -3.544355 | 4.561294  | -1.186006 |
|    |          |           |           | C | -3.379660 | -1.439065 | 0.010790  |
|    |          |           |           | C | -6.067271 | -2.168845 | -0.185375 |
|    |          |           |           | C | -3.940222 | -2.322172 | 0.947135  |

|   |           |           |           |
|---|-----------|-----------|-----------|
| C | -4.157588 | -0.959437 | -1.057858 |
| C | -5.493674 | -1.336324 | -1.150964 |
| C | -5.287553 | -2.660034 | 0.864115  |
| H | -3.305261 | -2.726129 | 1.728542  |
| H | -3.713920 | -0.329374 | -1.818422 |
| H | -6.090273 | -0.980212 | -1.985114 |
| H | -5.722497 | -3.325174 | 1.603421  |
| H | -7.113152 | -2.449278 | -0.263532 |

**TS3NN**

B3LYP/BS1 SCF energy: -2941.215994 a.u.  
M06-L/BS2 SCF energy in solution:  
-2941.390429 a.u.  
M06-L/BS2 Free energy in solution:  
-2940.990453 a.u.

|    |           |           |           |
|----|-----------|-----------|-----------|
| Ti | 0.679514  | -0.087791 | 0.842008  |
| C  | 3.592727  | 0.400735  | -0.533686 |
| C  | 5.776135  | 1.703671  | -1.719088 |
| C  | 4.708710  | -0.335542 | -0.971792 |
| C  | 3.571554  | 1.793078  | -0.713106 |
| C  | 4.659813  | 2.432336  | -1.305352 |
| C  | 5.794825  | 0.317283  | -1.547411 |
| H  | 4.710269  | -1.414945 | -0.862412 |
| H  | 2.718632  | 2.358604  | -0.359075 |
| H  | 4.636903  | 3.510726  | -1.432171 |
| H  | 6.654396  | -0.260984 | -1.873765 |
| H  | 6.622714  | 2.209453  | -2.173173 |
| Cl | -0.156603 | -1.168870 | 2.770432  |
| Cl | 0.975001  | 2.058375  | 1.578655  |
| C  | 1.579488  | -2.409238 | 0.295412  |
| N  | 2.481102  | -0.265628 | 0.021827  |
| C  | 2.556353  | -1.487961 | 0.708861  |
| C  | 3.598309  | -1.747738 | 1.764154  |
| H  | 3.112771  | -1.968221 | 2.721332  |
| H  | 4.235217  | -0.872855 | 1.905083  |
| H  | 4.238797  | -2.602831 | 1.513893  |
| C  | 1.412048  | -3.733865 | 0.985128  |
| H  | 2.356460  | -4.288841 | 1.015275  |
| H  | 0.668137  | -4.355472 | 0.484827  |
| H  | 1.077121  | -3.579956 | 2.016351  |

|   |           |           |           |
|---|-----------|-----------|-----------|
| C | 0.919146  | -0.637664 | -1.147400 |
| C | 0.821592  | -2.001937 | -0.847541 |
| C | 0.805111  | 0.039808  | -2.468032 |
| H | 1.546805  | 0.845554  | -2.529949 |
| H | -0.179237 | 0.510391  | -2.586624 |
| H | 0.974816  | -0.636307 | -3.315292 |
| C | -0.009460 | -2.971162 | -1.655009 |
| H | 0.551101  | -3.879875 | -1.903187 |
| H | -0.337877 | -2.514230 | -2.591977 |
| H | -0.910798 | -3.268827 | -1.108588 |
| N | -1.420328 | 0.255164  | 0.260197  |
| N | -2.009617 | -0.835057 | -0.006665 |
| C | -2.117723 | 1.521129  | 0.309736  |
| C | -3.391602 | 3.988912  | 0.516553  |
| C | -1.676864 | 2.594205  | -0.468167 |
| C | -3.172708 | 1.682133  | 1.214433  |
| C | -3.802757 | 2.920388  | 1.316049  |
| C | -2.329556 | 3.822343  | -0.374173 |
| H | -0.835776 | 2.464119  | -1.139560 |
| H | -3.474520 | 0.849871  | 1.840640  |
| H | -4.613704 | 3.050384  | 2.026033  |
| H | -1.996430 | 4.653716  | -0.987788 |
| H | -3.887764 | 4.951139  | 0.597247  |
| C | -3.319169 | -0.930361 | -0.542277 |
| C | -5.839342 | -1.491588 | -1.625629 |
| C | -4.025581 | -2.077846 | -0.142746 |
| C | -3.870540 | -0.081621 | -1.520458 |
| C | -5.118612 | -0.375950 | -2.061371 |
| C | -5.290199 | -2.339453 | -0.661128 |
| H | -3.565749 | -2.736790 | 0.586490  |
| H | -3.323060 | 0.786362  | -1.865532 |
| H | -5.533409 | 0.273006  | -2.826902 |
| H | -5.838735 | -3.214749 | -0.327051 |
| H | -6.817427 | -1.704583 | -2.046057 |

**IM4NN**

B3LYP/BS1 SCF energy: -2941.313500 a.u.  
M06-L/BS2 SCF energy in solution:  
-2941.491188 a.u.  
M06-L/BS2 Free energy in solution:  
-2941.087047 a.u.

|    |           |           |           |                                         |           |           |           |
|----|-----------|-----------|-----------|-----------------------------------------|-----------|-----------|-----------|
| Ti | 0.007164  | 0.096042  | -0.375129 | C                                       | 3.691788  | -1.586760 | 0.602674  |
| C  | -3.763500 | -0.029171 | 0.053492  | C                                       | 4.552618  | -2.679051 | 0.699050  |
| C  | -6.237719 | 0.178872  | -1.198164 | C                                       | 3.302132  | -3.834746 | -1.009346 |
| C  | -4.907552 | -0.508124 | 0.698866  | H                                       | 1.609419  | -2.767743 | -1.826512 |
| C  | -3.844447 | 0.556712  | -1.210599 | H                                       | 3.841670  | -0.702916 | 1.211256  |
| C  | -5.090544 | 0.659219  | -1.830864 | H                                       | 5.380516  | -2.641504 | 1.401717  |
| C  | -6.145958 | -0.405289 | 0.066764  | H                                       | 3.152616  | -4.704185 | -1.643459 |
| H  | -4.822952 | -0.951444 | 1.686194  | H                                       | 5.043679  | -4.651870 | -0.024931 |
| H  | -2.948152 | 0.920615  | -1.699205 | C                                       | 2.633237  | 1.626836  | 0.034983  |
| H  | -5.158212 | 1.112009  | -2.814842 | C                                       | 4.367286  | 3.756162  | -0.583843 |
| H  | -7.036201 | -0.777482 | 0.564036  | C                                       | 2.636528  | 2.798497  | 0.811966  |
| H  | -7.202661 | 0.259191  | -1.689230 | C                                       | 3.513891  | 1.535037  | -1.055713 |
| Cl | -0.746778 | -1.261102 | -2.112690 | C                                       | 4.369506  | 2.594012  | -1.356054 |
| Cl | -0.398460 | 2.151371  | -1.308018 | C                                       | 3.491380  | 3.850916  | 0.501008  |
| C  | -0.709665 | -1.032452 | 1.772665  | H                                       | 1.961679  | 2.871465  | 1.658376  |
| N  | -2.495054 | -0.134837 | 0.736430  | H                                       | 3.519218  | 0.639611  | -1.666077 |
| C  | -1.788951 | -1.322021 | 0.931753  | H                                       | 5.043212  | 2.506612  | -2.204146 |
| C  | -2.289035 | -2.638340 | 0.433040  | H                                       | 3.475661  | 4.750112  | 1.110945  |
| H  | -1.461681 | -3.342923 | 0.340383  | H                                       | 5.037263  | 4.576515  | -0.822684 |
| H  | -2.759659 | -2.543976 | -0.545506 |                                         |           |           |           |
| H  | -3.018368 | -3.059384 | 1.135912  | <b>TS3CC</b>                            |           |           |           |
| C  | 0.265744  | -2.015199 | 2.353821  | B3LYP/BS1 SCF energy: -2524.431788 a.u. |           |           |           |
| H  | 1.274623  | -1.597022 | 2.384476  | M06-L/BS2 SCF energy in solution:       |           |           |           |
| H  | 0.309008  | -2.937448 | 1.770820  | -2524.559694 a.u.                       |           |           |           |
| H  | -0.020460 | -2.279379 | 3.379108  | M06-L/BS2 Free energy in solution:      |           |           |           |
| C  | -1.911088 | 0.893967  | 1.481784  | -2524.256761 a.u.                       |           |           |           |
| C  | -0.801907 | 0.363220  | 2.132729  | Ti                                      | 0.765003  | 0.278551  | -0.514260 |
| C  | -2.503567 | 2.262801  | 1.518774  | C                                       | -2.432472 | -0.048520 | -0.021109 |
| H  | -2.440711 | 2.750302  | 0.541318  | C                                       | -5.150663 | 0.571705  | 0.265650  |
| H  | -1.963890 | 2.881158  | 2.237050  | C                                       | -3.355046 | -1.048538 | 0.334781  |
| H  | -3.556113 | 2.225409  | 1.817814  | C                                       | -2.878725 | 1.268048  | -0.215501 |
| C  | 0.089165  | 1.047756  | 3.122284  | C                                       | -4.231772 | 1.568362  | -0.068299 |
| H  | -0.102408 | 2.122179  | 3.164584  | C                                       | -4.705748 | -0.737467 | 0.464598  |
| H  | 1.136514  | 0.899248  | 2.846574  | H                                       | -3.002984 | -2.059356 | 0.512868  |
| H  | -0.067515 | 0.638422  | 4.127188  | H                                       | -2.165901 | 2.030615  | -0.504620 |
| N  | 1.735427  | -0.546876 | -0.423602 | H                                       | -4.569695 | 2.588096  | -0.227335 |
| N  | 1.774688  | 0.573419  | 0.439315  | H                                       | -5.411325 | -1.518556 | 0.732237  |
| C  | 2.614641  | -1.623029 | -0.302271 | H                                       | -6.203993 | 0.812255  | 0.371954  |
| C  | 4.365786  | -3.807221 | -0.100816 | Cl                                      | 2.269668  | -0.718681 | -2.062417 |
| C  | 2.430223  | -2.756775 | -1.118196 | Cl                                      | 0.169781  | 2.166628  | -1.689584 |

|   |           |           |           |    |           |           |           |
|---|-----------|-----------|-----------|----|-----------|-----------|-----------|
| C | 0.508708  | -2.064258 | 0.331195  | C  | -5.096706 | 0.747283  | 0.000435  |
| N | -1.058827 | -0.355586 | -0.118497 | C  | -3.582904 | -1.135871 | 0.000727  |
| C | -0.551295 | -1.614459 | -0.483601 | C  | -2.703801 | 1.132241  | -0.000568 |
| C | -1.109983 | -2.379633 | -1.654552 | C  | -4.010603 | 1.623394  | -0.000334 |
| H | -0.335326 | -2.511536 | -2.418323 | C  | -4.883075 | -0.632734 | 0.000965  |
| H | -1.941386 | -1.840013 | -2.111163 | H  | -3.400690 | -2.206275 | 0.001087  |
| H | -1.464891 | -3.376010 | -1.365240 | H  | -1.854076 | 1.805038  | -0.001125 |
| C | 1.227238  | -3.344341 | 0.002632  | H  | -4.173773 | 2.696301  | -0.000735 |
| H | 0.536181  | -4.194779 | 0.008633  | H  | -5.725355 | -1.317571 | 0.001547  |
| H | 2.027703  | -3.559464 | 0.711356  | H  | -6.109573 | 1.138358  | 0.000623  |
| H | 1.674871  | -3.279377 | -0.994050 | Cl | 0.507403  | 1.964058  | -1.774772 |
| C | 0.178790  | 0.033930  | 1.417732  | Cl | 0.506135  | 1.964142  | 1.774283  |
| C | 0.803296  | -1.232174 | 1.448753  | C  | 0.706021  | -1.820864 | -0.723554 |
| C | -0.326323 | 0.824475  | 2.573689  | N  | -1.166480 | -0.800008 | -0.000292 |
| H | -1.140873 | 1.483011  | 2.253372  | C  | -0.468260 | -1.193191 | -1.142715 |
| H | 0.472342  | 1.471648  | 2.958080  | C  | -1.036331 | -1.007379 | -2.510796 |
| H | -0.690418 | 0.201487  | 3.399647  | H  | -0.275473 | -1.223896 | -3.261554 |
| C | 1.593691  | -1.689469 | 2.655768  | H  | -1.375553 | 0.018736  | -2.664301 |
| H | 0.951800  | -2.219794 | 3.371967  | H  | -1.882356 | -1.685344 | -2.672930 |
| H | 2.044657  | -0.844132 | 3.182545  | C  | 1.709946  | -2.510612 | -1.602019 |
| H | 2.399982  | -2.372803 | 2.379159  | H  | 1.478492  | -3.578773 | -1.694837 |
| C | 3.174178  | 1.093280  | 0.607327  | H  | 2.718098  | -2.421320 | -1.192091 |
| C | 2.443085  | 2.066037  | 0.697302  | H  | 1.724994  | -2.082209 | -2.606480 |
| C | 4.221825  | 0.070962  | 0.578193  | C  | -0.467985 | -1.193617 | 1.141876  |
| H | 4.002844  | -0.748829 | 1.268293  | C  | 0.706143  | -1.821211 | 0.722193  |
| H | 4.326276  | -0.345135 | -0.426213 | C  | -1.035922 | -1.008573 | 2.510125  |
| H | 5.173017  | 0.524390  | 0.879034  | H  | -1.375969 | 0.017225  | 2.663921  |
| C | 1.827116  | 3.381249  | 0.907942  | H  | -0.274721 | -1.224596 | 3.260683  |
| H | 0.832174  | 3.304410  | 1.353154  | H  | -1.881339 | -1.687284 | 2.672305  |
| H | 2.460082  | 3.973522  | 1.578157  | C  | 1.710069  | -2.511597 | 1.600144  |
| H | 1.720558  | 3.911109  | -0.041304 | H  | 1.478739  | -3.579872 | 1.691920  |

**IM4CC**

B3LYP/BS1 SCF energy: -2524.512845 a.u.

M06-L/BS2 SCF energy in solution:  
-2524.637809 a.u.

M06-L/BS2 Free energy in solution:  
-2524.330655 a.u.

|    |           |           |           |   |          |           |          |
|----|-----------|-----------|-----------|---|----------|-----------|----------|
| Ti | 1.125609  | 0.564335  | 0.000045  | H | 3.845286 | -0.318853 | 2.470004 |
| C  | -2.502746 | -0.248493 | -0.000027 | C | 3.940646 | 0.555224  | 1.814326 |

H 4.991533 0.634966 1.506628  
H 3.687486 1.427864 2.426600

**TS3PhCF<sub>3</sub>**

B3LYP/BS1 SCF energy: -2937.744220 a.u.  
M06-L/BS2 SCF energy in solution:  
-2937.931324 a.u.  
M06-L/BS2 Free energy in solution:  
-2937.616418 a.u.

Ti 0.545579 0.380435 -0.732907  
C 3.427217 -0.891887 0.000383  
C 5.472164 -2.752847 0.419194  
C 4.674427 -0.469808 0.489645  
C 3.202890 -2.250859 -0.265487  
C 4.226248 -3.172451 -0.051603  
C 5.691920 -1.399492 0.687570  
H 4.832865 0.579550 0.715057  
H 2.238191 -2.561099 -0.650811  
H 4.050002 -4.222594 -0.263869  
H 6.656391 -1.067150 1.059861  
H 6.267103 -3.475137 0.577472  
Cl -0.544464 1.958439 -2.087513  
Cl -0.105505 -1.642345 -1.602505  
C 1.778424 2.279680 0.231300  
N 2.379263 0.038628 -0.181900  
C 2.560107 1.400090 -0.548311  
C 3.562328 1.795265 -1.603001  
H 3.082868 2.403097 -2.376690  
H 3.976307 0.909716 -2.089383  
H 4.398462 2.375219 -1.192870  
C 1.716949 3.759166 -0.035426  
H 2.444993 4.061384 -0.789386  
H 1.929601 4.323055 0.878647  
H 0.725147 4.050170 -0.395517  
C 1.002249 0.240004 1.224421  
C 1.012273 1.657534 1.251397  
C 0.967442 -0.722829 2.355755  
H 1.433928 -1.665697 2.051035  
H -0.073274 -0.963930 2.598863  
H 1.471226 -0.353343 3.256555

C 0.247829 2.423704 2.308450  
H -0.127830 3.369655 1.910682  
H 0.883581 2.653921 3.173412  
H -0.614218 1.856259 2.667439  
C -4.088995 -0.505206 0.392896  
C -4.025514 -1.090720 -0.877101  
C -5.206846 -1.351649 -1.566802  
C -6.440834 -1.032961 -0.993952  
C -6.496372 -0.450390 0.272393  
C -5.318694 -0.184226 0.970855  
H -3.063465 -1.332842 -1.318295  
H -5.163193 -1.801188 -2.553708  
H -7.358835 -1.237562 -1.536865  
H -7.454385 -0.200543 0.717631  
H -5.352176 0.270719 1.954154  
C -2.810382 -0.248787 1.132039  
F -2.987689 0.418738 2.292171  
F -2.150048 -1.391110 1.430044  
F -1.942305 0.508683 0.385170

**IM4PhCF<sub>3</sub>**

B3LYP/BS1 SCF energy: -2937.768748 a.u.  
M06-L/BS2 SCF energy in solution:  
-2937.955274 a.u.  
M06-L/BS2 Free energy in solution:  
-2937.637467 a.u.

Ti 0.459608 -0.039012 -0.719381  
C 3.602808 -0.162732 0.341714  
C 6.235044 -1.027637 0.619439  
C 4.506647 0.593708 1.096577  
C 4.005251 -1.347145 -0.274351  
C 5.326826 -1.775546 -0.129913  
C 5.823372 0.158284 1.232847  
H 4.172681 1.512662 1.568584  
H 3.287528 -1.915901 -0.854283  
H 5.643333 -2.697098 -0.608709  
H 6.526457 0.743856 1.817507  
H 7.261404 -1.365639 0.726077  
Cl -0.953134 1.062252 -2.274211  
Cl 0.812953 -2.107078 -1.672609



|                                   |                   |           |           |                                    |           |           |           |
|-----------------------------------|-------------------|-----------|-----------|------------------------------------|-----------|-----------|-----------|
| C                                 | 0.889197          | 2.210849  | 0.291463  | M06-L/BS2 Free energy in solution: |           |           |           |
| N                                 | 2.243087          | 0.310666  | 0.218676  | -2616.587169 a.u.                  |           |           |           |
| C                                 | 1.881803          | 1.530318  | -0.507274 |                                    |           |           |           |
| C                                 | 2.798800          | 2.116950  | -1.535587 | Ti                                 | -0.104924 | 0.706118  | -0.768560 |
| H                                 | 2.224153          | 2.761963  | -2.204743 | N                                  | -3.073904 | -0.834691 | 0.416048  |
| H                                 | 3.262011          | 1.337041  | -2.145933 | C                                  | -5.635802 | -1.954829 | 0.213452  |
| H                                 | 3.606774          | 2.714825  | -1.091047 | C                                  | -4.131079 | -0.092574 | 0.053972  |
| C                                 | 0.324609          | 3.546125  | -0.086949 | C                                  | -3.290649 | -2.133087 | 0.669235  |
| H                                 | 1.112689          | 4.307705  | -0.102332 | C                                  | -4.543754 | -2.739084 | 0.582947  |
| H                                 | -0.445592         | 3.874394  | 0.613775  | C                                  | -5.424859 | -0.604297 | -0.057860 |
| H                                 | -0.124212         | 3.502212  | -1.084808 | H                                  | -3.921025 | 0.950168  | -0.168880 |
| C                                 | 1.229202          | 0.129100  | 1.266780  | H                                  | -2.417604 | -2.717931 | 0.951340  |
| C                                 | 0.498570          | 1.379422  | 1.337033  | H                                  | -4.655061 | -3.797066 | 0.798248  |
| C                                 | 1.448166          | -0.863527 | 2.367790  | H                                  | -6.241627 | 0.045117  | -0.356134 |
| H                                 | 1.795054          | -1.823168 | 1.976779  | H                                  | -6.628414 | -2.388786 | 0.134057  |
| H                                 | 0.505156          | -1.041364 | 2.891241  | C                                  | 2.701166  | -0.824780 | 0.156873  |
| H                                 | 2.183058          | -0.514734 | 3.107293  | C                                  | 4.832274  | -2.621499 | 0.076295  |
| C                                 | -0.575206         | 1.628805  | 2.354119  | C                                  | 3.561846  | -0.937058 | 1.255838  |
| H                                 | -0.143366         | 1.725987  | 3.357421  | C                                  | 2.903681  | -1.604336 | -0.982406 |
| H                                 | -1.288747         | 0.799869  | 2.385946  | C                                  | 3.974540  | -2.500152 | -1.016816 |
| H                                 | -1.135213         | 2.540473  | 2.138066  | C                                  | 4.623334  | -1.838946 | 1.214380  |
| C                                 | -3.977466         | -0.653151 | 0.257369  | H                                  | 3.395659  | -0.316423 | 2.130785  |
| C                                 | -6.304168         | 0.837291  | 0.565600  | H                                  | 2.223426  | -1.512656 | -1.820554 |
| C                                 | -4.257495         | 0.382095  | -0.642793 | H                                  | 4.131498  | -3.107117 | -1.903202 |
| C                                 | -4.851280         | -0.945647 | 1.307266  | H                                  | 5.288785  | -1.926163 | 2.067918  |
| C                                 | -6.018054         | -0.196427 | 1.458131  | H                                  | 5.660757  | -3.322581 | 0.043457  |
| C                                 | -5.424435         | 1.125380  | -0.481248 | Cl                                 | -1.710230 | 2.312516  | -1.219733 |
| H                                 | -3.560909         | 0.603653  | -1.446113 | Cl                                 | -0.147618 | -0.747354 | -2.532837 |
| H                                 | -4.623378         | -1.754836 | 1.991781  | C                                  | 0.960911  | 2.264025  | 0.805526  |
| H                                 | -6.702340         | -0.422838 | 2.269887  | N                                  | 1.622230  | 0.130090  | 0.232384  |
| H                                 | -5.647534         | 1.929578  | -1.175323 | C                                  | 1.774923  | 1.542336  | -0.140854 |
| H                                 | -7.213674         | 1.418828  | 0.684399  | C                                  | 3.016290  | 2.022919  | -0.828431 |
| C                                 | -2.717413         | -1.444726 | 0.078612  | H                                  | 2.849753  | 3.032835  | -1.210844 |
| F                                 | -2.624029         | -2.494052 | 0.910162  | H                                  | 3.279800  | 1.386224  | -1.675933 |
| F                                 | -1.595274         | -0.646948 | 0.379417  | H                                  | 3.880070  | 2.054705  | -0.149087 |
| F                                 | -2.535574         | -1.872621 | -1.169980 | C                                  | 0.863304  | 3.759897  | 0.799133  |
|                                   |                   |           |           | H                                  | 1.765992  | 4.206587  | 1.232789  |
|                                   |                   |           |           | H                                  | 0.002904  | 4.114097  | 1.368736  |
|                                   |                   |           |           | H                                  | 0.758777  | 4.137486  | -0.222492 |
|                                   |                   |           |           | C                                  | 0.507623  | 0.014833  | 1.172317  |
|                                   |                   |           |           | C                                  | 0.209900  | 1.367014  | 1.569091  |
| <b>TS4a</b>                       |                   |           |           |                                    |           |           |           |
| B3LYP/BS1 SCF energy:             | -2616.768071a.u.  |           |           |                                    |           |           |           |
| M06-L/BS2 SCF energy in solution: | -2616.892823 a.u. |           |           |                                    |           |           |           |

|   |           |           |          |
|---|-----------|-----------|----------|
| C | 0.265533  | -1.243320 | 1.946792 |
| H | 0.402830  | -2.126544 | 1.318099 |
| H | -0.765281 | -1.245846 | 2.307553 |
| H | 0.933703  | -1.341670 | 2.814112 |
| C | -0.893097 | 1.686742  | 2.533802 |
| H | -0.594583 | 1.440872  | 3.559868 |
| H | -1.786469 | 1.099154  | 2.298136 |
| H | -1.166948 | 2.742556  | 2.505313 |

### IM5a

B3LYP/BS1 SCF energy: -2368.471332 a.u.

M06-L/BS2 SCF energy in solution:  
-2368.572322 a.u.

M06-L/BS2 Free energy in solution:  
-2368.345534 a.u.

|    |           |           |           |
|----|-----------|-----------|-----------|
| Ti | 1.190556  | 0.824958  | 0.000371  |
| C  | -1.984360 | -0.180325 | -0.000013 |
| C  | -4.764743 | 0.005275  | -0.000139 |
| C  | -2.760967 | -1.345564 | 0.000053  |
| C  | -2.590091 | 1.075802  | -0.000141 |
| C  | -3.984280 | 1.161083  | -0.000217 |
| C  | -4.150972 | -1.249695 | -0.000007 |
| H  | -2.270961 | -2.314341 | 0.000133  |
| H  | -1.974458 | 1.967172  | -0.000163 |
| H  | -4.456979 | 2.138370  | -0.000325 |
| H  | -4.752984 | -2.153223 | 0.000043  |
| H  | -5.847933 | 0.079887  | -0.000190 |
| Cl | 3.473151  | 0.972440  | 0.000062  |
| Cl | 0.392011  | 2.956724  | 0.000689  |
| C  | 1.285078  | -1.526546 | -0.700151 |
| N  | -0.547391 | -0.329710 | -0.000015 |
| C  | 0.217154  | -0.697701 | -1.190892 |
| C  | -0.426526 | -0.732546 | -2.543352 |
| H  | 0.348209  | -0.773104 | -3.312862 |
| H  | -1.027850 | 0.161436  | -2.722958 |
| H  | -1.077789 | -1.608759 | -2.670724 |
| C  | 2.314087  | -2.126346 | -1.611112 |
| H  | 1.884469  | -2.952785 | -2.189028 |
| H  | 3.173975  | -2.508705 | -1.059786 |
| H  | 2.684668  | -1.380087 | -2.321766 |

|   |           |           |          |
|---|-----------|-----------|----------|
| C | 0.217153  | -0.698348 | 1.190721 |
| C | 1.285086  | -1.526918 | 0.699458 |
| C | -0.426731 | -0.734535 | 2.543053 |
| H | -1.029017 | 0.158736  | 2.722983 |
| H | 0.347887  | -0.774645 | 3.312707 |
| H | -1.077103 | -1.611489 | 2.669873 |
| C | 2.314153  | -2.127148 | 1.610077 |
| H | 1.884485  | -2.953595 | 2.187944 |
| H | 2.685063  | -1.381097 | 2.320784 |
| H | 3.173824  | -2.509605 | 1.058481 |

### TS5a

B3LYP/BS1 SCF energy: -2941.242185 a.u.

M06-L/BS2 SCF energy in solution:  
-2941.420018 a.u.

M06-L/BS2 Free energy in solution:  
-2941.016476 a.u.

|    |           |           |           |
|----|-----------|-----------|-----------|
| Ti | 0.142575  | -0.783451 | 0.887135  |
| C  | -2.755935 | -0.795852 | -0.731038 |
| C  | -5.339384 | 0.067291  | -1.324386 |
| C  | -3.590243 | -1.588148 | -1.527815 |
| C  | -3.205697 | 0.428392  | -0.233712 |
| C  | -4.498300 | 0.856574  | -0.539717 |
| C  | -4.884042 | -1.157649 | -1.816255 |
| H  | -3.220784 | -2.530045 | -1.920541 |
| H  | -2.563282 | 1.028936  | 0.397764  |
| H  | -4.844722 | 1.809710  | -0.153046 |
| H  | -5.531525 | -1.775709 | -2.430723 |
| H  | -6.346167 | 0.403984  | -1.552236 |
| Cl | 1.956348  | -1.630851 | 2.044676  |
| Cl | -1.305363 | -0.246496 | 2.626446  |
| C  | 0.675987  | -1.898924 | -1.170084 |
| N  | -1.412213 | -1.256014 | -0.481277 |
| C  | -0.260445 | -0.812087 | -1.260784 |
| C  | -0.409762 | 0.167470  | -2.381675 |
| H  | 0.568910  | 0.578730  | -2.640424 |
| H  | -1.055827 | 1.002904  | -2.107472 |
| H  | -0.828362 | -0.305343 | -3.281018 |
| C  | 2.025396  | -1.915820 | -1.826297 |
| H  | 2.008931  | -2.534782 | -2.731745 |

|                                         |           |           |           |                                    |           |           |           |
|-----------------------------------------|-----------|-----------|-----------|------------------------------------|-----------|-----------|-----------|
| H                                       | 2.787987  | -2.321459 | -1.156068 | M06-L/BS2 Free energy in solution: |           |           |           |
| H                                       | 2.347216  | -0.913409 | -2.114218 | -3189.260088 a.u.                  |           |           |           |
| C                                       | -1.099496 | -2.510550 | 0.166317  |                                    |           |           |           |
| C                                       | 0.156100  | -2.914355 | -0.342338 | Ti                                 | 1.293574  | -0.147226 | 0.210430  |
| C                                       | -2.126807 | -3.289518 | 0.921537  | N                                  | 3.308642  | -1.145925 | -0.369362 |
| H                                       | -2.748780 | -2.629848 | 1.529784  | C                                  | 5.793111  | -2.225616 | -1.080101 |
| H                                       | -1.627684 | -3.988151 | 1.596437  | C                                  | 4.094637  | -1.743747 | 0.546820  |
| H                                       | -2.781724 | -3.869023 | 0.257180  | C                                  | 3.752635  | -1.091922 | -1.640256 |
| C                                       | 0.852375  | -4.184605 | 0.041951  | C                                  | 4.983442  | -1.612690 | -2.033629 |
| H                                       | 0.594718  | -4.982146 | -0.665639 | C                                  | 5.335518  | -2.292694 | 0.234388  |
| H                                       | 0.560319  | -4.511611 | 1.041969  | H                                  | 3.688074  | -1.794711 | 1.549834  |
| H                                       | 1.936676  | -4.062501 | 0.038067  | H                                  | 3.075679  | -0.639231 | -2.353990 |
| N                                       | 1.978754  | 2.038043  | -0.515914 | H                                  | 5.286956  | -1.541278 | -3.072609 |
| N                                       | 1.139683  | 1.734384  | 0.397356  | H                                  | 5.922487  | -2.765542 | 1.014468  |
| C                                       | 3.210186  | 1.369624  | -0.525969 | H                                  | 6.755626  | -2.646382 | -1.355928 |
| C                                       | 5.745299  | 0.203016  | -0.742203 | C                                  | -0.212745 | 2.781628  | -0.474427 |
| C                                       | 3.922618  | 1.432300  | -1.739731 | C                                  | -2.029403 | 4.590256  | -1.575404 |
| C                                       | 3.796603  | 0.748831  | 0.591884  | C                                  | -0.381681 | 4.042398  | 0.107740  |
| C                                       | 5.057420  | 0.169965  | 0.474072  | C                                  | -0.946103 | 2.420792  | -1.606428 |
| C                                       | 5.174886  | 0.838147  | -1.850560 | C                                  | -1.846929 | 3.334038  | -2.157410 |
| H                                       | 3.468912  | 1.954735  | -2.576324 | C                                  | -1.296461 | 4.941188  | -0.439995 |
| H                                       | 3.272245  | 0.745790  | 1.537809  | H                                  | 0.204575  | 4.313362  | 0.979725  |
| H                                       | 5.506509  | -0.306319 | 1.340189  | H                                  | -0.801324 | 1.436082  | -2.037640 |
| H                                       | 5.713658  | 0.880726  | -2.792502 | H                                  | -2.410185 | 3.058094  | -3.044273 |
| H                                       | 6.729541  | -0.249070 | -0.821838 | H                                  | -1.429206 | 5.917911  | 0.015876  |
| C                                       | 0.021519  | 2.639230  | 0.392498  | H                                  | -2.736025 | 5.293723  | -2.005819 |
| C                                       | -2.121313 | 4.434246  | 0.545806  | Cl                                 | 1.208908  | -1.762645 | 2.009931  |
| C                                       | -0.634109 | 2.849498  | 1.611269  | Cl                                 | 0.547135  | -0.835805 | -1.974506 |
| C                                       | -0.388844 | 3.347671  | -0.750201 | C                                  | 2.213915  | 1.470469  | 1.866535  |
| C                                       | -1.461208 | 4.230424  | -0.671021 | N                                  | 0.755128  | 1.870272  | 0.085448  |
| C                                       | -1.698265 | 3.749024  | 1.685424  | C                                  | 0.823029  | 1.515032  | 1.499241  |
| H                                       | -0.302823 | 2.313098  | 2.491307  | C                                  | -0.336996 | 1.695390  | 2.427759  |
| H                                       | 0.151483  | 3.204278  | -1.677512 | H                                  | -0.252904 | 0.977103  | 3.247798  |
| H                                       | -1.781013 | 4.767651  | -1.559387 | H                                  | -1.282397 | 1.510374  | 1.915990  |
| H                                       | -2.194703 | 3.910343  | 2.637286  | H                                  | -0.369626 | 2.704107  | 2.864016  |
| H                                       | -2.953896 | 5.129295  | 0.603866  | C                                  | 2.682172  | 1.225281  | 3.268602  |
|                                         |           |           |           | H                                  | 2.440488  | 2.079047  | 3.913689  |
| <b>TS4b</b>                             |           |           |           | H                                  | 3.762716  | 1.070023  | 3.314327  |
| B3LYP/BS1 SCF energy: -3189.545657 a.u. |           |           |           | H                                  | 2.195612  | 0.339289  | 3.687763  |
| M06-L/BS2 SCF energy in solution:       |           |           |           | C                                  | 2.125193  | 1.779916  | -0.419304 |
| -3189.748341 a.u.                       |           |           |           | C                                  | 2.987935  | 1.649382  | 0.722353  |

|                                    |           |           |           |    |           |           |           |
|------------------------------------|-----------|-----------|-----------|----|-----------|-----------|-----------|
| C                                  | 2.466829  | 2.320086  | -1.773230 | N  | 3.250872  | -0.855659 | -0.120178 |
| H                                  | 1.822353  | 1.901030  | -2.549820 | C  | 5.949905  | -1.601750 | -0.387945 |
| H                                  | 3.499093  | 2.059498  | -2.021508 | C  | 3.993369  | -1.210118 | 0.950302  |
| H                                  | 2.382914  | 3.415234  | -1.815500 | C  | 3.860599  | -0.873820 | -1.323695 |
| C                                  | 4.484567  | 1.683099  | 0.639972  | C  | 5.194129  | -1.237258 | -1.498478 |
| H                                  | 4.839870  | 2.720934  | 0.612565  | C  | 5.331503  | -1.584986 | 0.860085  |
| H                                  | 4.852702  | 1.191668  | -0.264696 | H  | 3.471242  | -1.212110 | 1.899636  |
| H                                  | 4.951200  | 1.195001  | 1.498455  | H  | 3.236366  | -0.602488 | -2.166517 |
| N                                  | -1.593346 | -0.849830 | 0.316029  | H  | 5.618719  | -1.235634 | -2.496844 |
| N                                  | -2.398866 | 0.087654  | 0.499936  | H  | 5.867158  | -1.864064 | 1.761312  |
| C                                  | -2.025221 | -2.153646 | -0.128314 | H  | 6.990643  | -1.894572 | -0.491907 |
| C                                  | -2.690679 | -4.704360 | -1.034377 | C  | -1.065882 | 2.675537  | -0.547908 |
| C                                  | -1.579290 | -3.276181 | 0.575737  | C  | -3.344892 | 3.800818  | -1.684726 |
| C                                  | -2.769815 | -2.301686 | -1.305553 | C  | -1.625396 | 3.825435  | 0.015179  |
| C                                  | -3.093657 | -3.578150 | -1.756372 | C  | -1.635987 | 2.081955  | -1.675291 |
| C                                  | -1.936426 | -4.548522 | 0.129576  | C  | -2.771434 | 2.657766  | -2.244962 |
| H                                  | -0.957597 | -3.137627 | 1.452327  | C  | -2.771324 | 4.381859  | -0.552469 |
| H                                  | -3.070382 | -1.425421 | -1.868322 | H  | -1.162978 | 4.285994  | 0.881475  |
| H                                  | -3.659129 | -3.693336 | -2.676332 | H  | -1.186860 | 1.187413  | -2.091597 |
| H                                  | -1.606683 | -5.420439 | 0.686704  | H  | -3.214594 | 2.201193  | -3.124624 |
| H                                  | -2.950732 | -5.698022 | -1.387144 | H  | -3.206655 | 5.274985  | -0.114859 |
| C                                  | -3.827456 | -0.047990 | 0.483034  | H  | -4.233529 | 4.238634  | -2.129296 |
| C                                  | -6.617699 | 0.018420  | 0.618335  | Cl | 1.160352  | -1.277339 | 2.335403  |
| C                                  | -4.535873 | 0.994481  | -0.129537 | Cl | 0.896900  | -0.433318 | -2.256249 |
| C                                  | -4.516129 | -1.035344 | 1.203731  | C  | 1.744092  | 1.852901  | 1.629065  |
| C                                  | -5.906586 | -0.989850 | 1.273633  | N  | 0.147797  | 2.140650  | 0.023163  |
| C                                  | -5.928058 | 1.007913  | -0.085892 | C  | 0.350340  | 1.853740  | 1.405714  |
| H                                  | -3.980583 | 1.777264  | -0.636525 | C  | -0.734870 | 1.855734  | 2.430746  |
| H                                  | -3.966989 | -1.819935 | 1.710745  | H  | -0.437685 | 1.207231  | 3.257499  |
| H                                  | -6.437165 | -1.749245 | 1.840393  | H  | -1.662197 | 1.464944  | 2.011383  |
| H                                  | -6.474232 | 1.803890  | -0.583471 | H  | -0.906755 | 2.863731  | 2.829284  |
| H                                  | -7.702101 | 0.040725  | 0.669504  | C  | 2.400348  | 1.736181  | 2.971078  |
|                                    |           |           |           | H  | 2.283545  | 2.670753  | 3.533810  |
|                                    |           |           |           | H  | 3.470507  | 1.539038  | 2.874766  |
|                                    |           |           |           | H  | 1.962935  | 0.922154  | 3.552856  |
|                                    |           |           |           | C  | 1.409605  | 2.301136  | -0.589027 |
|                                    |           |           |           | C  | 2.390570  | 2.126568  | 0.391727  |
|                                    |           |           |           | C  | 1.552687  | 2.816278  | -1.982894 |
|                                    |           |           |           | H  | 1.116657  | 2.136829  | -2.717424 |
|                                    |           |           |           | H  | 2.610686  | 2.939153  | -2.220682 |
|                                    |           |           |           | H  | 1.067285  | 3.794753  | -2.075348 |
| <b>IM5b</b>                        |           |           |           |    |           |           |           |
| B3LYP/BS1 SCF energy:              |           |           |           |    |           |           |           |
| -3189.551630 a.u.                  |           |           |           |    |           |           |           |
| M06-L/BS2 SCF energy in solution:  |           |           |           |    |           |           |           |
| -3189.770653 a.u.                  |           |           |           |    |           |           |           |
| M06-L/BS2 Free energy in solution: |           |           |           |    |           |           |           |
| -3189.281855 a.u.                  |           |           |           |    |           |           |           |
| Ti                                 | 0.945657  | -0.052927 | 0.177370  |    |           |           |           |

|                                         |           |           |           |    |           |           |           |
|-----------------------------------------|-----------|-----------|-----------|----|-----------|-----------|-----------|
| C                                       | 3.866488  | 2.296764  | 0.180797  | C  | -5.177262 | 0.343884  | -2.070342 |
| H                                       | 4.161826  | 3.335057  | 0.374060  | C  | -5.491206 | 1.859337  | -0.250548 |
| H                                       | 4.161619  | 2.050765  | -0.841192 | H  | -3.766977 | 2.016798  | 1.047857  |
| H                                       | 4.443442  | 1.659076  | 0.853268  | H  | -3.207335 | -0.528791 | -2.135768 |
| N                                       | -0.950604 | -0.811323 | 0.199004  | H  | -5.515930 | -0.164919 | -2.966848 |
| N                                       | -2.019131 | -0.129755 | 0.504184  | H  | -6.081722 | 2.570436  | 0.317638  |
| C                                       | -1.075975 | -2.121568 | -0.415750 | H  | -7.008206 | 1.443894  | -1.733091 |
| C                                       | -1.239709 | -4.573396 | -1.758208 | C  | 0.983267  | -2.855931 | -0.381144 |
| C                                       | -0.317355 | -3.211637 | 0.023180  | C  | 2.838566  | -4.411324 | -1.755663 |
| C                                       | -1.911094 | -2.260240 | -1.536755 | C  | 1.379120  | -4.090773 | 0.142280  |
| C                                       | -1.991072 | -3.478339 | -2.198397 | C  | 1.501264  | -2.393213 | -1.589755 |
| C                                       | -0.408649 | -4.433835 | -0.650007 | C  | 2.425911  | -3.183402 | -2.274935 |
| H                                       | 0.306797  | -3.111009 | 0.901995  | C  | 2.313860  | -4.864846 | -0.544501 |
| H                                       | -2.480524 | -1.406837 | -1.884856 | H  | 0.949088  | -4.446317 | 1.073551  |
| H                                       | -2.635652 | -3.573713 | -3.067361 | H  | 1.180436  | -1.436041 | -1.979376 |
| H                                       | 0.172948  | -5.279281 | -0.293768 | H  | 2.828152  | -2.829015 | -3.219103 |
| H                                       | -1.304948 | -5.524352 | -2.278715 | H  | 2.621766  | -5.822767 | -0.136744 |
| C                                       | -3.272718 | -0.719990 | 0.719457  | H  | 3.563388  | -5.014738 | -2.293804 |
| C                                       | -5.884769 | -1.601867 | 1.325237  | Cl | -1.681775 | 1.491185  | 2.080073  |
| C                                       | -4.395196 | 0.087209  | 0.437886  | Cl | -0.789836 | 0.217828  | -2.159457 |
| C                                       | -3.485523 | -1.970421 | 1.342064  | C  | -1.177859 | -1.608289 | 2.229726  |
| C                                       | -4.777057 | -2.394475 | 1.639024  | N  | -0.026900 | -2.108455 | 0.343334  |
| C                                       | -5.681907 | -0.356177 | 0.725150  | C  | 0.105100  | -1.750490 | 1.708379  |
| H                                       | -4.229389 | 1.059319  | -0.015329 | C  | 1.422727  | -1.684204 | 2.395409  |
| H                                       | -2.638394 | -2.587725 | 1.614509  | H  | 1.313403  | -1.176044 | 3.354857  |
| H                                       | -4.918830 | -3.354113 | 2.128982  | H  | 2.134614  | -1.133392 | 1.772177  |
| H                                       | -6.531966 | 0.277401  | 0.486018  | H  | 1.829782  | -2.683892 | 2.582222  |
| H                                       | -6.888665 | -1.944381 | 1.557421  | C  | -1.526378 | -1.319679 | 3.657269  |
| <b>TS5b</b>                             |           |           |           | H  | -0.705933 | -0.827305 | 4.181010  |
| B3LYP/BS1 SCF energy: -3189.550703 a.u. |           |           |           | H  | -1.752340 | -2.257131 | 4.181361  |
| M06-L/BS2 SCF energy in solution:       |           |           |           | H  | -2.395860 | -0.665015 | 3.727104  |
| -3189.765451 a.u.                       |           |           |           | C  | -1.406590 | -2.216444 | 0.026415  |
| M06-L/BS2 Free energy in solution:      |           |           |           | C  | -2.119097 | -1.886377 | 1.187560  |
| -3189.275980 a.u.                       |           |           |           | C  | -1.866347 | -2.893291 | -1.224176 |
|                                         |           |           |           | H  | -1.441216 | -2.429559 | -2.116526 |
|                                         |           |           |           | H  | -2.954081 | -2.840600 | -1.292729 |
| Ti                                      | -0.876063 | 0.122896  | 0.265003  | H  | -1.580145 | -3.951930 | -1.211528 |
| N                                       | -3.389061 | 0.701810  | -0.490196 | C  | -3.606322 | -1.924314 | 1.376614  |
| C                                       | -6.000238 | 1.236042  | -1.385969 | H  | -3.884309 | -2.793466 | 1.985118  |
| C                                       | -4.192824 | 1.560690  | 0.161903  | H  | -4.138345 | -1.993905 | 0.427166  |
| C                                       | -3.887343 | 0.117565  | -1.596594 | H  | -3.960513 | -1.029355 | 1.894301  |



B3LYP/BS1 SCF energy: -2553.010989 a.u.  
M06-L/BS2 SCF energy in solution:  
-2553.119026 a.u.  
M06-L/BS2 Free energy in solution:  
-2552.900053 a.u.

|    |           |           |           |
|----|-----------|-----------|-----------|
| Ti | -0.000029 | -1.002079 | -0.000003 |
| N  | 2.273192  | -0.905461 | -0.000010 |
| C  | 5.037965  | -0.525629 | -0.000045 |
| C  | 2.956898  | -0.815704 | 1.156718  |
| C  | 2.956895  | -0.815896 | -1.156756 |
| C  | 4.334551  | -0.625238 | -1.199176 |
| C  | 4.334552  | -0.625034 | 1.199105  |
| H  | 2.367810  | -0.921813 | 2.060866  |
| H  | 2.367808  | -0.922162 | -2.060887 |
| H  | 4.838702  | -0.563251 | -2.157431 |
| H  | 4.838706  | -0.562884 | 2.157348  |
| H  | 6.114064  | -0.379522 | -0.000055 |
| N  | -2.273245 | -0.905350 | 0.000018  |
| C  | -5.038007 | -0.525440 | -0.000020 |
| C  | -2.957002 | -0.815968 | 1.156745  |
| C  | -2.956890 | -0.815370 | -1.156729 |
| C  | -4.334537 | -0.624653 | -1.199152 |
| C  | -4.334655 | -0.625280 | 1.199129  |
| H  | -2.367961 | -0.922403 | 2.060886  |
| H  | -2.367763 | -0.921340 | -2.060867 |
| H  | -4.838641 | -0.562320 | -2.157409 |
| H  | -4.838852 | -0.563447 | 2.157370  |
| H  | -6.114102 | -0.379305 | -0.000036 |
| N  | 0.000019  | 0.879481  | 0.000000  |
| C  | 0.000059  | 2.199931  | 0.000031  |
| C  | 0.000152  | 5.032760  | 0.000091  |
| C  | 0.000053  | 2.950888  | -1.229176 |
| C  | 0.000117  | 2.950835  | 1.229270  |
| C  | 0.000158  | 4.333346  | 1.218962  |
| C  | 0.000102  | 4.333397  | -1.218810 |
| H  | 0.000007  | 2.390196  | -2.158504 |
| H  | 0.000127  | 2.390107  | 2.158576  |
| H  | 0.000196  | 4.884335  | 2.155131  |
| H  | 0.000100  | 4.884426  | -2.154956 |
| H  | 0.000188  | 6.118685  | 0.000114  |

|    |           |           |           |
|----|-----------|-----------|-----------|
| Cl | 0.000014  | -2.215526 | 2.035110  |
| Cl | -0.000129 | -2.215411 | -2.035185 |

### TS1<sup>T</sup>

B3LYP/BS1 SCF energy: -2708.966910 a.u.  
M06-L/BS2 SCF energy in solution:  
-2709.104078 a.u.  
M06-L/BS2 Free energy in solution:  
-2708.804481 a.u.

|    |           |           |           |
|----|-----------|-----------|-----------|
| Ti | 0.393947  | 0.274664  | 0.105170  |
| N  | -0.863423 | 2.155842  | 0.020255  |
| C  | -2.565315 | 4.368157  | -0.138943 |
| C  | -1.914271 | 2.164187  | -0.825782 |
| C  | -0.656971 | 3.245293  | 0.787285  |
| C  | -1.475184 | 4.369530  | 0.728133  |
| C  | -2.790057 | 3.239404  | -0.925090 |
| H  | -2.035135 | 1.282326  | -1.441734 |
| H  | 0.179416  | 3.184018  | 1.473630  |
| H  | -1.257331 | 5.221706  | 1.362649  |
| H  | -3.624764 | 3.186574  | -1.615356 |
| H  | -3.226158 | 5.227680  | -0.201200 |
| N  | 2.753205  | 0.007461  | -0.171794 |
| C  | 5.535740  | -0.260376 | -0.351778 |
| C  | 3.430548  | 0.478094  | -1.237039 |
| C  | 3.461326  | -0.591458 | 0.807053  |
| C  | 4.841024  | -0.756466 | 0.750486  |
| C  | 4.814409  | 0.373675  | -1.359628 |
| H  | 2.826429  | 0.933297  | -2.013194 |
| H  | 2.893162  | -0.925878 | 1.665261  |
| H  | 5.354395  | -1.254730 | 1.565683  |
| H  | 5.304646  | 0.780693  | -2.237397 |
| H  | 6.614620  | -0.363923 | -0.420718 |
| C  | -2.292589 | -1.374858 | 0.145089  |
| C  | -4.869757 | -2.399402 | -0.369366 |
| C  | -3.233736 | -1.538595 | 1.192882  |
| C  | -2.683078 | -1.734810 | -1.170139 |
| C  | -3.954133 | -2.240921 | -1.416319 |
| C  | -4.504562 | -2.040890 | 0.932296  |
| H  | -2.946782 | -1.239643 | 2.195990  |
| H  | -1.966139 | -1.594896 | -1.973145 |

|    |           |           |           |   |           |           |           |
|----|-----------|-----------|-----------|---|-----------|-----------|-----------|
| H  | -4.238253 | -2.512162 | -2.429503 | C | -4.896458 | -0.905139 | 0.861923  |
| H  | -5.216909 | -2.151373 | 1.745265  | H | -2.956581 | -1.428326 | 1.664962  |
| H  | -5.861942 | -2.793911 | -0.567816 | H | -2.759104 | 0.808252  | -1.793584 |
| Cl | 0.402005  | 0.405082  | -2.339459 | H | -5.239949 | 0.971521  | -1.943296 |
| Cl | 1.123544  | 1.003603  | 2.325387  | H | -5.447696 | -1.421221 | 1.640521  |
| C  | 0.881373  | -2.600929 | -0.090364 | H | -6.635387 | -0.181831 | -0.197703 |
| N  | -1.047863 | -0.856376 | 0.395073  | C | 2.889062  | -0.594413 | 0.088182  |
| C  | 0.262994  | -2.220440 | 0.932298  | C | 5.391826  | 0.691042  | 0.118352  |
| C  | 0.018078  | -2.452083 | 2.377224  | C | 3.943228  | -1.059898 | -0.722918 |
| H  | 0.659571  | -3.260420 | 2.741460  | C | 3.104509  | 0.540191  | 0.895969  |
| H  | -1.025975 | -2.741854 | 2.533114  | C | 4.347464  | 1.164200  | 0.918107  |
| H  | 0.211926  | -1.542879 | 2.951478  | C | 5.178752  | -0.415933 | -0.705492 |
| C  | 1.400717  | -2.940092 | -1.407770 | H | 3.777960  | -1.896893 | -1.391339 |
| H  | 2.496313  | -2.915821 | -1.419632 | H | 2.288226  | 0.892989  | 1.517539  |
| H  | 1.044409  | -2.230382 | -2.166257 | H | 4.502083  | 2.025919  | 1.561167  |
| H  | 1.080573  | -3.949279 | -1.691011 | H | 5.977716  | -0.779206 | -1.345613 |

### IM1<sup>T</sup>

B3LYP/BS1 SCF energy: -2709.034285 a.u.  
M06-L/BS2 SCF energy in solution:  
-2709.164288 a.u.  
M06-L/BS2 Free energy in solution:  
-2708.860626 a.u.

|    |           |           |           |
|----|-----------|-----------|-----------|
| Ti | -0.452447 | -0.493238 | 0.010617  |
| N  | -0.215871 | 1.900840  | -0.022243 |
| C  | 0.140469  | 4.679311  | -0.034980 |
| C  | -0.723586 | 2.673204  | 0.958251  |
| C  | 0.470707  | 2.510853  | -1.008225 |
| C  | 0.674798  | 3.887398  | -1.049227 |
| C  | -0.574943 | 4.056939  | 0.986484  |
| H  | -1.246747 | 2.146212  | 1.748450  |
| H  | 0.849352  | 1.862109  | -1.790076 |
| H  | 1.241998  | 4.320412  | -1.866156 |
| H  | -1.010727 | 4.626563  | 1.800381  |
| H  | 0.279130  | 5.756421  | -0.039517 |
| N  | -2.754665 | -0.310857 | -0.058963 |
| C  | -5.550790 | -0.216908 | -0.158297 |
| C  | -3.505477 | -0.924702 | 0.877675  |
| C  | -3.394121 | 0.349104  | -1.044998 |
| C  | -4.781196 | 0.423593  | -1.127348 |

|    |           |           |           |
|----|-----------|-----------|-----------|
| H  | 6.358803  | 1.184779  | 0.131225  |
| Cl | -0.597590 | -0.338733 | 2.379489  |
| Cl | -0.433611 | -0.381226 | -2.363512 |
| C  | -0.108510 | -2.610562 | -0.005633 |
| N  | 1.610451  | -1.155457 | 0.086489  |
| C  | 1.292899  | -2.470365 | 0.058004  |
| C  | 2.308882  | -3.586669 | 0.145875  |
| H  | 1.884731  | -4.434954 | 0.688663  |
| H  | 3.220032  | -3.264884 | 0.655537  |
| H  | 2.591123  | -3.948382 | -0.850125 |
| C  | -0.806723 | -3.922896 | -0.100839 |
| H  | -1.233166 | -4.032096 | -1.109280 |
| H  | -1.661862 | -3.962813 | 0.585704  |
| H  | -0.179844 | -4.805829 | 0.085185  |

### IM2<sup>T</sup>

B3LYP/BS1 SCF energy: -2460.716452 a.u.  
M06-L/BS2 SCF energy in solution:  
-2460.815237 a.u.  
M06-L/BS2 Free energy in solution:  
-2460.595162 a.u.

|    |           |           |          |
|----|-----------|-----------|----------|
| Ti | -0.477593 | -1.358312 | 0.070413 |
| N  | 1.839338  | -0.875696 | 0.064022 |
| C  | 4.547565  | -0.170553 | 0.132308 |



|    |           |           |           |    |           |           |           |
|----|-----------|-----------|-----------|----|-----------|-----------|-----------|
| C  | 2.642209  | -1.096150 | -0.996063 | Ti | 0.942213  | -0.442786 | -0.737379 |
| C  | 2.384673  | -0.309098 | 1.159044  | N  | 1.236418  | 1.694351  | -0.023609 |
| C  | 3.724393  | 0.057183  | 1.233888  | C  | 1.588640  | 4.383543  | 0.647172  |
| C  | 3.993020  | -0.760179 | -1.002029 | C  | 2.430826  | 2.147555  | 0.408675  |
| H  | 2.170043  | -1.561982 | -1.854627 | C  | 0.221158  | 2.574477  | -0.130163 |
| H  | 1.718207  | -0.166099 | 2.002737  | C  | 0.355474  | 3.921420  | 0.189948  |
| H  | 4.107162  | 0.507991  | 2.143012  | C  | 2.641955  | 3.477639  | 0.759721  |
| H  | 4.591840  | -0.965350 | -1.882862 | H  | 3.225116  | 1.409908  | 0.445996  |
| H  | 5.598183  | 0.102320  | 0.158997  | H  | -0.725575 | 2.178510  | -0.481122 |
| C  | -0.712199 | 1.947439  | -0.117754 | H  | -0.493868 | 4.586639  | 0.079862  |
| C  | 0.395309  | 4.533321  | -0.137558 | H  | 3.621910  | 3.790515  | 1.103256  |
| C  | -1.305932 | 2.986988  | 0.625054  | H  | 1.726438  | 5.428848  | 0.906734  |
| C  | 0.457259  | 2.221763  | -0.852121 | C  | -2.453742 | -0.186544 | -0.035292 |
| C  | 0.995164  | 3.504830  | -0.868891 | C  | -4.927984 | 1.150677  | 0.073914  |
| C  | -0.750855 | 4.264397  | 0.613316  | C  | -3.314943 | -0.361508 | 1.063137  |
| H  | -2.177216 | 2.780462  | 1.236143  | C  | -2.847050 | 0.673880  | -1.076185 |
| H  | 0.918369  | 1.421078  | -1.419917 | C  | -4.075795 | 1.329328  | -1.018622 |
| H  | 1.887893  | 3.702563  | -1.454845 | C  | -4.540686 | 0.302719  | 1.112554  |
| H  | -1.214468 | 5.052111  | 1.199898  | H  | -3.010379 | -1.009866 | 1.879092  |
| H  | 0.820887  | 5.531932  | -0.146800 | H  | -2.190191 | 0.788805  | -1.932785 |
| Cl | -0.290937 | -2.430265 | -1.968609 | H  | -4.371242 | 1.978751  | -1.837818 |
| Cl | -0.313780 | -2.082142 | 2.245718  | H  | -5.192522 | 0.157415  | 1.969418  |
| C  | -2.605949 | -1.127739 | 0.017029  | H  | -5.882629 | 1.666016  | 0.114909  |
| N  | -1.201587 | 0.635176  | -0.104893 | Cl | 0.363540  | 0.010971  | -2.915852 |
| C  | -2.512730 | 0.264157  | -0.162504 | Cl | 3.294338  | -0.801237 | -0.876909 |
| C  | -3.643893 | 1.219643  | -0.464091 | C  | 0.433797  | -2.392957 | -0.015185 |
| H  | -4.404832 | 0.710887  | -1.060691 | N  | -1.185890 | -0.797703 | -0.090105 |
| H  | -3.298161 | 2.100852  | -1.009020 | C  | -0.972362 | -2.103322 | 0.018741  |
| H  | -4.132057 | 1.563561  | 0.455382  | C  | -2.055745 | -3.154324 | 0.066409  |
| C  | -3.881618 | -1.888362 | 0.057396  | H  | -1.807584 | -3.970731 | -0.618263 |
| H  | -3.962150 | -2.412140 | 1.019881  | H  | -3.035269 | -2.754868 | -0.199392 |
| H  | -3.864169 | -2.681846 | -0.701567 | H  | -2.119609 | -3.592441 | 1.070053  |
| H  | -4.795049 | -1.294722 | -0.081717 | C  | 0.931185  | -3.797856 | -0.170694 |
|    |           |           |           | H  | 0.541844  | -4.206009 | -1.115142 |
|    |           |           |           | H  | 0.607964  | -4.486471 | 0.624246  |
|    |           |           |           | H  | 2.018822  | -3.837712 | -0.246534 |
|    |           |           |           | C  | 0.695467  | -0.522693 | 2.200871  |
|    |           |           |           | C  | 1.276273  | -1.542755 | 1.775143  |
|    |           |           |           | C  | -0.057736 | 0.583209  | 2.776869  |
|    |           |           |           | H  | -0.993301 | 0.772887  | 2.237561  |
|    |           |           |           | H  | 0.526899  | 1.509330  | 2.766681  |

**TS2<sup>T</sup>**  
B3LYP/BS1 SCF energy: -2616.677319 a.u.  
M06-L/BS2 SCF energy in solution:  
-2616.804095a.u.  
M06-L/BS2 Free energy in solution:  
-2616.502843 a.u.

|   |           |           |          |
|---|-----------|-----------|----------|
| H | -0.316586 | 0.361352  | 3.819554 |
| C | 2.417122  | -2.454235 | 2.086075 |
| H | 2.918046  | -2.108108 | 2.993996 |
| H | 3.137468  | -2.454314 | 1.265363 |
| H | 2.072823  | -3.478689 | 2.251065 |

### IM3<sup>T</sup>

B3LYP/BS1 SCF energy: -2616.761993 a.u.

M06-L/BS2 SCF energy in solution:  
-2616.881209 a.u.

M06-L/BS2 Free energy in solution:  
-2616.574806 a.u.

|    |           |           |           |
|----|-----------|-----------|-----------|
| Ti | -0.428416 | -0.262243 | 0.024901  |
| N  | -2.704513 | -0.758143 | -0.172620 |
| C  | -5.442097 | -1.242939 | -0.489436 |
| C  | -3.430506 | -0.082876 | -1.086069 |
| C  | -3.338268 | -1.676524 | 0.581881  |
| C  | -4.697873 | -1.949226 | 0.452204  |
| C  | -4.792483 | -0.289783 | -1.272930 |
| H  | -2.884586 | 0.629623  | -1.694175 |
| H  | -2.719859 | -2.193629 | 1.307417  |
| H  | -5.154287 | -2.703963 | 1.083400  |
| H  | -5.324775 | 0.284288  | -2.023529 |
| H  | -6.504279 | -1.431720 | -0.613038 |
| C  | 2.560821  | -0.763846 | 0.004660  |
| C  | 4.310081  | -2.946997 | -0.047290 |
| C  | 3.069870  | -1.283813 | 1.201512  |
| C  | 2.918093  | -1.346867 | -1.217278 |
| C  | 3.790143  | -2.436301 | -1.237002 |
| C  | 3.946527  | -2.366959 | 1.169854  |
| H  | 2.763189  | -0.843183 | 2.143489  |
| H  | 2.497107  | -0.954357 | -2.136269 |
| H  | 4.060531  | -2.885344 | -2.188282 |
| H  | 4.337865  | -2.763990 | 2.101881  |
| H  | 4.987640  | -3.795336 | -0.066667 |
| Cl | -0.360720 | -0.412536 | -2.310538 |
| Cl | -0.273868 | -1.730499 | 1.846485  |
| C  | 1.202263  | 2.725070  | -0.084983 |
| N  | 1.636836  | 0.337833  | 0.042099  |
| C  | 2.079502  | 1.566569  | -0.123807 |

|   |           |          |           |
|---|-----------|----------|-----------|
| C | 3.560873  | 1.821517 | -0.342353 |
| H | 3.790233  | 1.888415 | -1.412601 |
| H | 4.157863  | 1.007507 | 0.065913  |
| H | 3.878553  | 2.756180 | 0.122868  |
| C | 1.777783  | 4.019086 | -0.622373 |
| H | 2.510768  | 3.842824 | -1.411192 |
| H | 2.277107  | 4.616571 | 0.154800  |
| H | 0.992777  | 4.647962 | -1.046002 |
| C | -0.808033 | 1.619382 | 0.894312  |
| C | -0.085333 | 2.759993 | 0.530327  |
| C | -2.030824 | 1.747363 | 1.776115  |
| H | -2.347747 | 0.774663 | 2.159997  |
| H | -2.887563 | 2.169806 | 1.229225  |
| H | -1.855552 | 2.397484 | 2.643685  |
| C | -0.662414 | 4.150816 | 0.791831  |
| H | -1.499157 | 4.113026 | 1.487579  |
| H | -1.037842 | 4.604010 | -0.134474 |
| H | 0.080170  | 4.840282 | 1.205650  |

### TS3<sup>T</sup>

B3LYP/BS1 SCF energy: -2616.742733 a.u.

M06-L/BS2 SCF energy in solution:  
-2616.867268 a.u.

M06-L/BS2 Free energy in solution:  
-2616.562698 a.u.

|    |           |           |           |
|----|-----------|-----------|-----------|
| Ti | -0.372391 | -0.358741 | -0.618895 |
| N  | -2.621073 | -0.503185 | -0.125939 |
| C  | -5.320065 | -0.616564 | 0.585240  |
| C  | -3.471240 | 0.480592  | -0.477621 |
| C  | -3.110241 | -1.550162 | 0.565038  |
| C  | -4.447356 | -1.643045 | 0.940825  |
| C  | -4.821133 | 0.464230  | -0.140599 |
| H  | -3.045306 | 1.285828  | -1.066324 |
| H  | -2.399633 | -2.336823 | 0.792731  |
| H  | -4.790625 | -2.510943 | 1.493264  |
| H  | -5.463209 | 1.280697  | -0.452730 |
| H  | -6.369555 | -0.661545 | 0.860151  |
| C  | 2.856074  | -0.122647 | -0.008935 |
| C  | 5.477886  | -1.046053 | 0.428427  |
| C  | 3.821751  | 0.712468  | 0.589767  |

|                                         |           |           |           |    |           |           |           |
|-----------------------------------------|-----------|-----------|-----------|----|-----------|-----------|-----------|
| C                                       | 3.218610  | -1.436336 | -0.363730 | C  | -5.539735 | -0.455270 | 0.028364  |
| C                                       | 4.516727  | -1.885876 | -0.141841 | C  | -3.598465 | 0.791372  | -0.644217 |
| C                                       | 5.121168  | 0.254142  | 0.791909  | C  | -3.321618 | -1.373492 | 0.129327  |
| H                                       | 3.542077  | 1.714818  | 0.900218  | C  | -4.688929 | -1.520763 | 0.326185  |
| H                                       | 2.471574  | -2.084366 | -0.809034 | C  | -4.974894 | 0.719081  | -0.471362 |
| H                                       | 4.781358  | -2.900898 | -0.423934 | H  | -3.125821 | 1.673763  | -1.060485 |
| H                                       | 5.854969  | 0.913547  | 1.247148  | H  | -2.632200 | -2.187866 | 0.323054  |
| H                                       | 6.490194  | -1.402441 | 0.592517  | H  | -5.074319 | -2.463232 | 0.700671  |
| Cl                                      | -0.875268 | 0.582033  | -2.713342 | H  | -5.590012 | 1.572543  | -0.736464 |
| Cl                                      | -0.218766 | -2.686462 | -0.784741 | H  | -6.612169 | -0.540842 | 0.172522  |
| C                                       | 0.080452  | 2.060638  | 0.410495  | C  | 3.003704  | -0.007902 | 0.173713  |
| N                                       | 1.545116  | 0.311664  | -0.222330 | C  | 5.575250  | -0.552054 | -0.743931 |
| C                                       | 1.182781  | 1.645190  | -0.332600 | C  | 4.093265  | 0.684054  | 0.712387  |
| C                                       | 1.853856  | 2.512972  | -1.366108 | C  | 3.190921  | -0.975565 | -0.816388 |
| H                                       | 1.247735  | 2.521440  | -2.279819 | C  | 4.483268  | -1.244964 | -1.268770 |
| H                                       | 2.836693  | 2.114533  | -1.620701 | C  | 5.379018  | 0.412744  | 0.246191  |
| H                                       | 1.964730  | 3.544265  | -1.018624 | H  | 3.929682  | 1.422798  | 1.490508  |
| C                                       | -0.578487 | 3.397847  | 0.164244  | H  | 2.334294  | -1.508438 | -1.218557 |
| H                                       | -0.085817 | 4.210591  | 0.714412  | H  | 4.631261  | -1.995120 | -2.039191 |
| H                                       | -1.626789 | 3.390928  | 0.475588  | H  | 6.225753  | 0.951405  | 0.660436  |
| H                                       | -0.557061 | 3.658103  | -0.896579 | H  | 6.577328  | -0.762886 | -1.104801 |
| C                                       | 0.043341  | -0.097634 | 1.509257  | Cl | -0.775415 | 1.374445  | -2.471521 |
| C                                       | -0.304220 | 1.222523  | 1.548651  | Cl | -0.238335 | -2.403281 | -1.057294 |
| C                                       | 0.346890  | -1.101281 | 2.559467  | C  | -0.161594 | 1.451161  | 1.269998  |
| H                                       | 1.389077  | -1.430011 | 2.445811  | N  | 1.681074  | 0.282471  | 0.664267  |
| H                                       | -0.269161 | -2.001292 | 2.468324  | C  | 0.995339  | 1.495137  | 0.479858  |
| H                                       | 0.242767  | -0.692526 | 3.574066  | C  | 1.582187  | 2.625879  | -0.304380 |
| C                                       | -1.116251 | 1.823239  | 2.676226  | H  | 0.789350  | 3.294018  | -0.640977 |
| H                                       | -0.687309 | 2.776684  | 3.005325  | H  | 2.103740  | 2.269057  | -1.194444 |
| H                                       | -1.161063 | 1.147100  | 3.532488  | H  | 2.291084  | 3.203747  | 0.301648  |
| H                                       | -2.146012 | 2.025108  | 2.358006  | C  | -1.125363 | 2.582336  | 1.495882  |
| <b>IM4<sup>T</sup></b>                  |           |           |           | H  | -0.860202 | 3.155487  | 2.393670  |
| B3LYP/BS1 SCF energy: -2616.802191 a.u. |           |           |           | H  | -2.146905 | 2.216737  | 1.630726  |
| M06-L/BS2 SCF energy in solution:       |           |           |           | H  | -1.130914 | 3.275163  | 0.650948  |
| -2616.929168 a.u.                       |           |           |           | C  | 0.958507  | -0.526451 | 1.551013  |
| M06-L/BS2 Free energy in solution:      |           |           |           | C  | -0.180309 | 0.172500  | 1.940285  |
| -2616.620250 a.u.                       |           |           |           | C  | 1.478794  | -1.856825 | 1.988127  |
|                                         |           |           |           | H  | 1.502123  | -2.569965 | 1.159497  |
|                                         |           |           |           | H  | 0.838194  | -2.268743 | 2.769396  |
| Ti                                      | -0.590635 | -0.075273 | -0.584168 | H  | 2.491821  | -1.761759 | 2.393595  |
| N                                       | -2.761627 | -0.230722 | -0.338631 | C  | -1.203422 | -0.264639 | 2.949733  |

|   |           |           |          |
|---|-----------|-----------|----------|
| H | -1.067037 | 0.263158  | 3.901465 |
| H | -1.138811 | -1.336069 | 3.152138 |
| H | -2.220202 | -0.057025 | 2.604669 |

**TS4<sup>T</sup>**

B3LYP/BS1 SCF energy: -3189.575081 a.u.  
M06-L/BS2 SCF energy in solution:  
-3189.758653 a.u.  
M06-L/BS2 Free energy in solution:  
-3189.276973 a.u.

|    |           |           |           |
|----|-----------|-----------|-----------|
| Ti | -0.437585 | -0.562180 | 0.414105  |
| N  | -2.387065 | -1.562578 | 0.087943  |
| C  | -4.846637 | -2.818808 | -0.396276 |
| C  | -3.165093 | -1.994799 | 1.108124  |
| C  | -2.845219 | -1.742279 | -1.173477 |
| C  | -4.057925 | -2.363041 | -1.451808 |
| C  | -4.387385 | -2.624499 | 0.906863  |
| H  | -2.777317 | -1.805740 | 2.103180  |
| H  | -2.207918 | -1.361438 | -1.964625 |
| H  | -4.372629 | -2.478288 | -2.483383 |
| H  | -4.965538 | -2.952309 | 1.764287  |
| H  | -5.797334 | -3.308552 | -0.583451 |
| C  | 3.689801  | -0.879165 | -0.436946 |
| C  | 5.955235  | 0.680171  | -0.889243 |
| C  | 4.955427  | -1.378084 | -0.111074 |
| C  | 3.551455  | 0.394808  | -0.992624 |
| C  | 4.690226  | 1.171115  | -1.215188 |
| C  | 6.087495  | -0.595955 | -0.337778 |
| H  | 5.042453  | -2.373193 | 0.314075  |
| H  | 2.563429  | 0.759371  | -1.253253 |
| H  | 4.580883  | 2.163836  | -1.640057 |
| H  | 7.069875  | -0.983450 | -0.084905 |
| H  | 6.837187  | 1.289069  | -1.065248 |
| Cl | -0.871738 | -0.070595 | 2.769750  |
| Cl | -0.033312 | 0.201035  | -1.844929 |
| C  | 0.857590  | -2.769027 | 0.856479  |
| N  | 2.535759  | -1.701876 | -0.196730 |
| C  | 1.865209  | -1.805175 | 1.022058  |
| C  | 2.441232  | -1.217974 | 2.277092  |
| H  | 1.684668  | -1.184181 | 3.061137  |

|   |           |           |           |
|---|-----------|-----------|-----------|
| H | 2.801706  | -0.197785 | 2.118136  |
| H | 3.291327  | -1.813159 | 2.635599  |
| C | 0.100192  | -3.461212 | 1.961017  |
| H | 0.642008  | -4.357766 | 2.291130  |
| H | -0.887861 | -3.789528 | 1.625717  |
| H | -0.041396 | -2.812470 | 2.827172  |
| C | 1.960437  | -2.552706 | -1.128197 |
| C | 0.925564  | -3.228978 | -0.508599 |
| C | 2.412314  | -2.564385 | -2.551429 |
| H | 2.064802  | -1.665861 | -3.074344 |
| H | 2.006801  | -3.434530 | -3.071366 |
| H | 3.503301  | -2.600822 | -2.630281 |
| C | 0.051975  | -4.291721 | -1.110252 |
| H | 0.179541  | -5.253224 | -0.597453 |
| H | 0.282805  | -4.451089 | -2.166276 |
| H | -1.011184 | -4.035028 | -1.045316 |
| N | -0.789796 | 2.539557  | 0.340784  |
| N | -1.605156 | 3.210779  | -0.341532 |
| C | 0.505944  | 3.124218  | 0.435496  |
| C | 3.067449  | 4.179235  | 0.772515  |
| C | 1.011806  | 4.039429  | -0.500634 |
| C | 1.286315  | 2.729042  | 1.530497  |
| C | 2.561335  | 3.269012  | 1.701557  |
| C | 2.291187  | 4.557542  | -0.329722 |
| H | 0.393779  | 4.319744  | -1.345258 |
| H | 0.865639  | 2.028686  | 2.245928  |
| H | 3.158014  | 2.978720  | 2.561222  |
| H | 2.688255  | 5.260504  | -1.056738 |
| H | 4.063708  | 4.592082  | 0.902127  |
| C | -2.921505 | 2.692202  | -0.401196 |
| C | -5.579881 | 1.871303  | -0.629034 |
| C | -3.710204 | 3.149842  | -1.465565 |
| C | -3.473136 | 1.839283  | 0.569969  |
| C | -4.801316 | 1.439473  | 0.450164  |
| C | -5.030900 | 2.725237  | -1.588465 |
| H | -3.263645 | 3.828062  | -2.185337 |
| H | -2.866165 | 1.523883  | 1.412478  |
| H | -5.235505 | 0.793407  | 1.207607  |
| H | -5.635164 | 3.070190  | -2.422197 |
| H | -6.615948 | 1.555548  | -0.711759 |

**IM5<sup>T</sup>**

B3LYP/BS1 SCF energy: -2591.102435 a.u.  
M06-L/BS2 SCF energy in solution:  
-2591.217325 a.u.  
M06-L/BS2 Free energy in solution:  
-2590.990341 a.u.

|    |           |           |           |
|----|-----------|-----------|-----------|
| Ti | 0.638303  | -1.245417 | -0.473522 |
| N  | 2.568519  | -0.404909 | 0.250438  |
| C  | 4.977568  | 0.720364  | 1.088156  |
| C  | 3.263287  | 0.419739  | -0.559470 |
| C  | 3.067719  | -0.680705 | 1.472008  |
| C  | 4.263543  | -0.133603 | 1.926759  |
| C  | 4.468348  | 0.999028  | -0.180114 |
| H  | 2.833412  | 0.602163  | -1.538675 |
| H  | 2.486257  | -1.370705 | 2.073900  |
| H  | 4.624601  | -0.384880 | 2.917854  |
| H  | 4.991535  | 1.651776  | -0.869889 |
| H  | 5.916262  | 1.157775  | 1.414164  |
| C  | -0.603311 | 1.838189  | -0.177305 |
| C  | -0.864643 | 4.628359  | -0.336470 |
| C  | 0.341231  | 2.678985  | 0.440763  |
| C  | -1.677552 | 2.410279  | -0.886892 |
| C  | -1.796943 | 3.794786  | -0.960676 |
| C  | 0.204621  | 4.061309  | 0.362069  |
| H  | 1.163562  | 2.231230  | 0.988840  |
| H  | -2.396450 | 1.769303  | -1.383459 |
| H  | -2.624576 | 4.226272  | -1.516049 |
| H  | 0.934820  | 4.699459  | 0.851199  |
| H  | -0.968941 | 5.707054  | -0.396807 |
| Cl | 1.253045  | -1.800761 | -2.598591 |
| Cl | 0.606423  | -3.004954 | 1.046531  |
| N  | -0.387417 | 0.459432  | -0.112101 |
| C  | -2.588205 | -0.597074 | 0.105156  |
| C  | -3.161477 | 0.289976  | 1.039745  |
| C  | -3.354454 | -1.673284 | -0.387213 |
| C  | -4.475800 | 0.097465  | 1.454291  |
| H  | -2.576141 | 1.104180  | 1.448283  |
| C  | -4.667665 | -1.845818 | 0.031284  |
| H  | -2.897242 | -2.356937 | -1.094982 |
| C  | -5.238355 | -0.960300 | 0.951185  |

|   |           |           |           |
|---|-----------|-----------|-----------|
| H | -4.906901 | 0.778353  | 2.182508  |
| H | -5.248019 | -2.677247 | -0.357109 |
| H | -6.263933 | -1.098061 | 1.279112  |
| N | -1.276722 | -0.515891 | -0.352061 |

**TS10<sup>T</sup>**

B3LYP/BS1 SCF energy: -2772.783520 a.u.  
M06-L/BS2 SCF energy in solution:  
-2772.921291 a.u.  
M06-L/BS2 Free energy in solution:  
-2772.537447 a.u.

|    |           |           |           |
|----|-----------|-----------|-----------|
| Ti | -0.796170 | 0.499453  | 0.271721  |
| N  | -2.678866 | -0.517746 | -0.121532 |
| C  | -5.115323 | -1.802823 | -0.648650 |
| C  | -3.612918 | -0.673734 | 0.849183  |
| C  | -2.968516 | -0.989706 | -1.359416 |
| C  | -4.163440 | -1.633815 | -1.655807 |
| C  | -4.828927 | -1.306803 | 0.624579  |
| H  | -3.352533 | -0.262605 | 1.819203  |
| H  | -2.206303 | -0.825784 | -2.114641 |
| H  | -4.339671 | -1.991851 | -2.664498 |
| H  | -5.537442 | -1.403276 | 1.440301  |
| H  | -6.056889 | -2.303005 | -0.851792 |
| C  | 3.520035  | -0.228803 | -0.084761 |
| C  | 5.923397  | 1.112328  | -0.535168 |
| C  | 4.686686  | -0.653177 | 0.559369  |
| C  | 3.550868  | 0.860595  | -0.959599 |
| C  | 4.757561  | 1.526668  | -1.181237 |
| C  | 5.886729  | 0.021418  | 0.335390  |
| H  | 4.646484  | -1.508629 | 1.226335  |
| H  | 2.635125  | 1.166329  | -1.455658 |
| H  | 4.783030  | 2.372847  | -1.861331 |
| H  | 6.791541  | -0.307982 | 0.837318  |
| H  | 6.858506  | 1.635963  | -0.710531 |
| Cl | -1.217430 | 1.452216  | 2.445648  |
| Cl | 0.069734  | 0.896483  | -1.950295 |
| C  | 0.424893  | -1.687350 | 1.154493  |
| N  | 2.292658  | -0.936245 | 0.155699  |
| C  | 1.494436  | -0.789650 | 1.283893  |
| C  | 1.966973  | -0.022418 | 2.482671  |

|   |           |           |           |    |           |           |           |
|---|-----------|-----------|-----------|----|-----------|-----------|-----------|
| H | 1.127545  | 0.214591  | 3.135856  | C  | 3.381205  | 0.112407  | 1.205065  |
| H | 2.444302  | 0.920674  | 2.201826  | H  | 1.404247  | -0.084381 | 2.067219  |
| H | 2.703274  | -0.601796 | 3.055085  | H  | 1.415042  | -0.116351 | -2.063838 |
| C | -0.498381 | -2.133487 | 2.261564  | H  | 3.897207  | 0.119994  | -2.151210 |
| H | -0.070744 | -2.994928 | 2.791990  | H  | 3.885697  | 0.154351  | 2.164089  |
| H | -1.470185 | -2.450717 | 1.871702  | H  | 5.173608  | 0.262299  | 0.008833  |
| H | -0.676128 | -1.343118 | 2.993615  | Cl | -1.136123 | -1.506753 | 2.012385  |
| C | 1.746965  | -1.891248 | -0.691706 | Cl | -1.130207 | -1.518003 | -2.008378 |
| C | 0.599909  | -2.381286 | -0.098799 | C  | -3.755749 | 1.176064  | 0.007054  |
| C | 2.351742  | -2.182884 | -2.025923 | H  | -4.069919 | 0.611693  | 0.890077  |
| H | 2.145186  | -1.373255 | -2.735324 | H  | -4.265165 | 2.147586  | 0.016421  |
| H | 1.934820  | -3.104281 | -2.437730 | H  | -4.081268 | 0.622799  | -0.878921 |
| H | 3.437746  | -2.304192 | -1.961316 | C  | -0.143535 | 2.967511  | -0.023167 |
| C | -0.280120 | -3.485183 | -0.610206 | H  | 0.460415  | 2.931300  | -0.934909 |
| H | -0.250820 | -4.360248 | 0.051406  | H  | -0.634677 | 3.946628  | 0.022678  |
| H | 0.028088  | -3.817127 | -1.604682 | H  | 0.538473  | 2.886794  | 0.828368  |
| H | -1.329083 | -3.177700 | -0.681365 | C  | -2.288917 | 1.361784  | -0.001736 |
| C | -1.675532 | 3.410833  | -0.347861 | C  | -1.155566 | 1.887192  | -0.009182 |
| C | -2.756047 | 2.940390  | -0.633100 |    |           |           |           |
| C | -0.408462 | 4.063911  | -0.024671 |    |           |           |           |
| H | -0.487953 | 5.147352  | -0.168647 |    |           |           |           |
| H | -0.133568 | 3.878432  | 1.018842  |    |           |           |           |
| H | 0.393073  | 3.694092  | -0.672667 |    |           |           |           |
| C | -4.090353 | 2.475217  | -1.002433 |    |           |           |           |
| H | -4.052862 | 1.771361  | -1.840646 |    |           |           |           |
| H | -4.589273 | 1.976871  | -0.164565 |    |           |           |           |
| H | -4.718267 | 3.320125  | -1.306943 |    |           |           |           |

### IM11<sup>T</sup>

B3LYP/BS1 SCF energy: -2174.278826 a.u.  
M06-L/BS2 SCF energy in solution:  
-2174.355110 a.u.  
M06-L/BS2 Free energy in solution:  
-2174.226920 a.u.

|    |           |           |           |
|----|-----------|-----------|-----------|
| Ti | -0.884521 | -0.360790 | -0.000821 |
| N  | 1.308902  | -0.069856 | 0.001130  |
| C  | 4.092015  | 0.168918  | 0.006691  |
| C  | 1.996850  | -0.010777 | 1.161285  |
| C  | 2.002972  | -0.028965 | -1.156111 |
| C  | 3.387576  | 0.093283  | -1.194360 |

### TS11<sup>T</sup>

B3LYP/BS1 SCF energy: -2330.240304 a.u.  
M06-L/BS2 SCF energy in solution:  
-2330.333945 a.u.  
M06-L/BS2 Free energy in solution:  
-2330.124812 a.u.

|    |           |           |           |
|----|-----------|-----------|-----------|
| Ti | 0.395158  | -0.261621 | -0.035904 |
| N  | -1.911289 | -0.205251 | -0.018176 |
| C  | -4.697973 | 0.051632  | -0.007174 |
| C  | -2.604353 | -0.105696 | -1.169168 |
| C  | -2.602311 | -0.183793 | 1.138442  |
| C  | -3.987691 | -0.057506 | 1.186706  |
| C  | -3.989307 | 0.026264  | -1.206649 |
| H  | -2.017596 | -0.157287 | -2.078956 |
| H  | -2.012481 | -0.291264 | 2.041749  |
| H  | -4.491328 | -0.051850 | 2.147325  |
| H  | -4.494211 | 0.099260  | -2.163819 |
| H  | -5.779500 | 0.148917  | -0.003016 |
| Cl | 0.253875  | -1.506438 | -2.043191 |
| Cl | 0.352359  | -1.389784 | 2.037828  |
| C  | 2.608874  | 0.177181  | -0.593303 |

|   |           |           |           |
|---|-----------|-----------|-----------|
| C | 2.964177  | -0.743246 | 0.197163  |
| C | 3.514284  | -1.773809 | 1.065048  |
| H | 3.096581  | -2.754165 | 0.814976  |
| H | 3.280149  | -1.581993 | 2.118053  |
| H | 4.605288  | -1.817305 | 0.949667  |
| C | 2.990639  | 0.688995  | -1.955863 |
| H | 2.792125  | 1.758303  | -2.058618 |
| H | 2.398420  | 0.160262  | -2.708243 |
| H | 4.051166  | 0.502013  | -2.148293 |
| C | 0.248293  | 1.813972  | 0.093254  |
| C | 1.529960  | 1.746730  | 0.267281  |
| C | -0.773195 | 2.897761  | 0.268343  |
| H | -1.547536 | 2.593539  | 0.979426  |
| H | -1.280334 | 3.098495  | -0.681930 |
| H | -0.329526 | 3.836930  | 0.621906  |
| C | 2.668766  | 2.556476  | 0.783484  |
| H | 3.166155  | 2.044096  | 1.612861  |
| H | 2.295009  | 3.522722  | 1.143285  |
| H | 3.426212  | 2.747744  | 0.016523  |

|   |           |           |           |
|---|-----------|-----------|-----------|
| C | -2.828407 | 0.591367  | -0.006700 |
| C | -2.359334 | -0.735025 | -0.109955 |
| C | -3.249684 | -1.931136 | -0.034521 |
| H | -3.211419 | -2.334008 | 0.989247  |
| H | -2.872146 | -2.729039 | -0.682569 |
| H | -4.300943 | -1.740732 | -0.284048 |
| C | -4.175033 | 0.972052  | 0.557899  |
| H | -4.734084 | 1.616077  | -0.132131 |
| H | -4.057164 | 1.537259  | 1.491010  |
| H | -4.788415 | 0.097322  | 0.777065  |
| C | -0.683967 | 1.131934  | -0.954064 |
| C | -1.923051 | 1.595417  | -0.470933 |
| C | 0.201420  | 1.994256  | -1.806906 |
| H | 0.899275  | 1.392814  | -2.397276 |
| H | 0.821802  | 2.648230  | -1.174095 |
| H | -0.353671 | 2.643673  | -2.495619 |
| C | -2.328710 | 3.051570  | -0.456562 |
| H | -3.187107 | 3.232380  | -1.116821 |
| H | -1.517817 | 3.706421  | -0.778836 |
| H | -2.635730 | 3.363879  | 0.548138  |

### IM12<sup>T</sup>

B3LYP/BS1 SCF energy: -2330.295970 a.u.  
M06-L/BS2 SCF energy in solution:  
-2330.385657 a.u.  
M06-L/BS2 Free energy in solution:  
-2330.174852 a.u.

|    |           |           |           |
|----|-----------|-----------|-----------|
| Ti | -0.243932 | -0.702445 | -0.023351 |
| N  | 2.020950  | -0.065559 | 0.178047  |
| C  | 4.667827  | 0.836752  | 0.292782  |
| C  | 2.477865  | 0.612410  | 1.249343  |
| C  | 2.882172  | -0.302995 | -0.831825 |
| C  | 4.205040  | 0.126998  | -0.814165 |
| C  | 3.785224  | 1.080916  | 1.343108  |
| H  | 1.764324  | 0.757300  | 2.053274  |
| H  | 2.487423  | -0.870569 | -1.667873 |
| H  | 4.853759  | -0.098619 | -1.653601 |
| H  | 4.098386  | 1.619724  | 2.230853  |
| H  | 5.694752  | 1.186562  | 0.337723  |
| Cl | -0.375931 | -0.745483 | 2.320069  |
| Cl | 0.271840  | -2.446463 | -1.409602 |

### TS12<sup>T</sup>

B3LYP/BS1 SCF energy: -2486.256627 a.u.  
M06-L/BS2 SCF energy in solution:  
-2486.401280 a.u.  
M06-L/BS2 Free energy in solution:  
-2486.108603 a.u.

|    |           |           |           |
|----|-----------|-----------|-----------|
| Ti | 0.015214  | 0.519912  | -0.214789 |
| C  | -0.791896 | 0.656102  | 1.792013  |
| C  | -2.205752 | 0.827539  | -0.427343 |
| C  | -3.059606 | -0.258303 | -0.234799 |
| C  | -0.376494 | -0.551066 | 1.698979  |
| C  | -2.398140 | -1.506841 | -0.143755 |
| C  | -0.984127 | -1.436335 | -0.130926 |
| C  | -2.628200 | 2.174172  | -0.913839 |
| H  | -2.137480 | 2.364646  | -1.876945 |
| H  | -3.710181 | 2.282997  | -1.059372 |
| H  | -2.267662 | 2.964438  | -0.246103 |
| C  | -4.564961 | -0.165325 | -0.129025 |
| H  | -4.919246 | 0.865329  | -0.169542 |

|                                                         |           |           |           |    |           |           |           |
|---------------------------------------------------------|-----------|-----------|-----------|----|-----------|-----------|-----------|
| H                                                       | -5.051547 | -0.717681 | -0.943096 | C  | 2.480040  | 0.679826  | 0.077145  |
| H                                                       | -4.925341 | -0.605569 | 0.808542  | C  | 1.623007  | 1.404619  | 0.955662  |
| C                                                       | -3.189650 | -2.792408 | -0.084984 | C  | 1.559094  | -1.418204 | 0.978870  |
| H                                                       | -3.872069 | -2.800989 | 0.774778  | C  | 0.603750  | 0.740624  | 1.682557  |
| H                                                       | -3.816104 | -2.910172 | -0.978381 | C  | 0.578953  | -0.698855 | 1.701436  |
| H                                                       | -2.554672 | -3.676338 | -0.014411 | C  | 3.450029  | 1.453009  | -0.788845 |
| C                                                       | -0.161242 | -2.669122 | -0.391588 | H  | 2.964074  | 2.329683  | -1.220970 |
| H                                                       | 0.904900  | -2.505645 | -0.222563 | H  | 4.317497  | 1.791855  | -0.207585 |
| H                                                       | -0.464548 | -3.536352 | 0.211143  | H  | 3.826802  | 0.858353  | -1.618570 |
| H                                                       | -0.285445 | -2.950479 | -1.444497 | C  | 1.784643  | 2.906944  | 1.054224  |
| C                                                       | 0.070908  | -1.714380 | 2.525150  | H  | 2.832048  | 3.189840  | 0.937770  |
| H                                                       | 1.019087  | -2.130195 | 2.172210  | H  | 1.216095  | 3.415255  | 0.267506  |
| H                                                       | 0.206583  | -1.392615 | 3.563521  | H  | 1.454994  | 3.284616  | 2.022283  |
| H                                                       | -0.665685 | -2.524499 | 2.516766  | C  | -0.379440 | 1.524278  | 2.528538  |
| C                                                       | -1.260702 | 1.753779  | 2.668294  | H  | -0.093610 | 1.513672  | 3.588405  |
| H                                                       | -2.319134 | 1.965324  | 2.476856  | H  | -0.446121 | 2.564279  | 2.212690  |
| H                                                       | -1.156645 | 1.489946  | 3.728667  | H  | -1.387602 | 1.111757  | 2.460961  |
| H                                                       | -0.702572 | 2.672147  | 2.468311  | C  | -0.403526 | -1.439480 | 2.586143  |
| Cl                                                      | 0.043130  | 0.271395  | -2.587454 | H  | -0.764523 | -2.353604 | 2.111532  |
| Cl                                                      | 0.731439  | 2.761755  | 0.027241  | H  | 0.063819  | -1.724434 | 3.537853  |
| N                                                       | 2.247012  | -0.158528 | -0.111420 | H  | -1.277000 | -0.835718 | 2.826178  |
| C                                                       | 2.924202  | 0.068993  | 1.030943  | C  | 1.647346  | -2.924361 | 1.092261  |
| C                                                       | 2.928212  | -0.638552 | -1.169431 | H  | 1.179392  | -3.407175 | 0.227312  |
| C                                                       | 4.284881  | -0.182161 | 1.164136  | H  | 2.691984  | -3.243285 | 1.122426  |
| H                                                       | 2.347160  | 0.476182  | 1.854246  | H  | 1.166280  | -3.295035 | 1.996565  |
| C                                                       | 4.290750  | -0.921038 | -1.116708 | C  | 3.388021  | -1.583317 | -0.750089 |
| H                                                       | 2.348273  | -0.774187 | -2.076172 | H  | 4.207713  | -1.982973 | -0.139036 |
| C                                                       | 4.983608  | -0.690325 | 0.069274  | H  | 2.855520  | -2.424540 | -1.198396 |
| H                                                       | 4.781028  | 0.024876  | 2.105987  | H  | 3.835738  | -1.017329 | -1.564107 |
| H                                                       | 4.791529  | -1.305909 | -1.998341 | Cl | 0.003861  | 2.027868  | -1.904422 |
| H                                                       | 6.047561  | -0.895562 | 0.138965  | Cl | -0.011539 | -1.996865 | -1.931027 |
|                                                         |           |           |           | N  | -2.062072 | 0.005909  | -0.369865 |
|                                                         |           |           |           | C  | -2.751713 | -1.149654 | -0.252654 |
|                                                         |           |           |           | C  | -2.756528 | 1.159420  | -0.259215 |
|                                                         |           |           |           | C  | -4.119879 | -1.194160 | -0.005334 |
|                                                         |           |           |           | H  | -2.175120 | -2.056553 | -0.394155 |
|                                                         |           |           |           | C  | -4.125052 | 1.199242  | -0.012325 |
|                                                         |           |           |           | H  | -2.182806 | 2.067630  | -0.404052 |
|                                                         |           |           |           | C  | -4.825281 | 0.001361  | 0.122860  |
|                                                         |           |           |           | H  | -4.616987 | -2.155134 | 0.073684  |
|                                                         |           |           |           | H  | -4.626383 | 2.158456  | 0.061083  |
| <b>IM13<sup>T</sup></b>                                 |           |           |           |    |           |           |           |
| B3LYP/BS1 SCF energy: -2486.447949 a.u.                 |           |           |           |    |           |           |           |
| M06-L/BS2 SCF energy in solution:<br>-2486.566728 a.u.  |           |           |           |    |           |           |           |
| M06-L/BS2 Free energy in solution:<br>-2486.262005 a.u. |           |           |           |    |           |           |           |
| Ti                                                      | 0.191522  | 0.007165  | -0.637050 |    |           |           |           |
| C                                                       | 2.447188  | -0.747167 | 0.087745  |    |           |           |           |



H -5.894167 -0.000410 0.313540

### TS13<sup>T</sup>

B3LYP/BS1 SCF energy: -2642.422037 a.u.

M06-L/BS2 SCF energy in solution:  
-2642.552745 a.u.

M06-L/BS2 Free energy in solution:  
-2642.173410 a.u.

Ti 0.823991 -0.664041 0.023163  
N 0.677003 1.498334 -0.022450  
C 0.514299 4.295694 -0.072926  
C 0.736174 2.222328 1.121675  
C 0.545669 2.169580 -1.191974  
C 0.460193 3.555018 -1.255035  
C 0.657490 3.609572 1.134730  
H 0.860180 1.648800 2.034793  
H 0.520620 1.555044 -2.086296  
H 0.357529 4.039377 -2.220140  
H 0.713634 4.137795 2.080530  
H 0.451107 5.379026 -0.092434  
Cl 1.432768 -1.167610 2.291333  
Cl 1.204308 -1.277775 -2.269107  
C -2.169489 -0.353800 1.463133  
C -1.780895 -1.614482 0.933507  
C -1.531741 -2.799061 1.852611  
H -1.608746 -2.527841 2.902733  
H -0.542188 -3.242034 1.719179  
H -2.276029 -3.579805 1.656467  
C -2.081637 -0.108825 2.957621  
H -2.947292 -0.519411 3.493880  
H -2.031315 0.955325 3.191697  
H -1.181397 -0.566401 3.371981  
C -2.673622 0.438656 -0.798644  
C -2.658933 0.645177 0.600758  
C -3.124783 1.563872 -1.712518  
H -2.651982 1.503534 -2.693494  
H -2.870072 2.541825 -1.299636  
H -4.210951 1.554335 -1.875147  
C -3.205847 1.943328 1.166342  
H -3.613964 1.806423 2.168474

H -4.014565 2.336969 0.547601  
H -2.437942 2.726006 1.230616  
C 3.804304 -0.988611 -0.125219  
C 3.833234 0.222941 -0.187905  
C 3.893803 -2.446901 -0.063527  
H 4.941934 -2.763344 -0.108566  
H 3.463699 -2.822250 0.870284  
H 3.364706 -2.902111 -0.906934  
C 4.012955 1.669805 -0.281724  
H 3.498095 2.083873 -1.154882  
H 3.636958 2.183789 0.608988  
H 5.077299 1.911409 -0.379202  
C -2.274255 -0.800414 -1.331642  
C -2.395143 -1.109131 -2.808911  
H -1.406616 -1.197088 -3.273632  
H -2.908309 -2.063925 -2.961465  
H -2.963521 -0.354094 -3.350310  
C -1.512103 -3.197095 -1.040258  
H -0.919307 -3.809556 -0.360191  
H -2.442664 -3.746816 -1.237821  
H -0.960514 -3.121884 -1.977949  
C -1.815590 -1.826795 -0.464991

### IM4NN<sup>T</sup>

B3LYP/BS1 SCF energy: -2941.301661 a.u.

M06-L/BS2 SCF energy in solution:  
-2941.461546 a.u.

M06-L/BS2 Free energy in solution:  
-2941.060196 a.u.

Ti 0.112813 -0.258821 -0.448160  
C 3.972130 0.062172 0.116507  
C 6.427583 0.107635 -1.191842  
C 5.086859 0.613126 0.754855  
C 4.075737 -0.470298 -1.170891  
C 5.310891 -0.447068 -1.819140  
C 6.314740 0.638709 0.094408  
H 4.987985 1.010595 1.760062  
H 3.200162 -0.885227 -1.658075  
H 5.394031 -0.857160 -2.820574  
H 7.181747 1.067561 0.587257

|    |           |           |           |
|----|-----------|-----------|-----------|
| H  | 7.384588  | 0.126531  | -1.704271 |
| Cl | 0.851691  | 1.207852  | -2.103563 |
| Cl | 0.480105  | -2.369643 | -1.335266 |
| C  | 0.791812  | 0.707249  | 1.785484  |
| N  | 2.713131  | 0.036684  | 0.813430  |
| C  | 1.902648  | 1.144649  | 1.058849  |
| C  | 2.317045  | 2.529751  | 0.682592  |
| H  | 1.449408  | 3.191097  | 0.692123  |
| H  | 2.747780  | 2.558748  | -0.319881 |
| H  | 3.054419  | 2.927854  | 1.389953  |
| C  | -0.234875 | 1.581606  | 2.449745  |
| H  | -1.203734 | 1.082610  | 2.513153  |
| H  | -0.387077 | 2.516560  | 1.906304  |
| H  | 0.077711  | 1.834501  | 3.470436  |
| C  | 2.120009  | -1.103169 | 1.341393  |
| C  | 0.925245  | -0.719503 | 1.952978  |
| C  | 2.785654  | -2.438461 | 1.279709  |
| H  | 2.771815  | -2.849772 | 0.266349  |
| H  | 2.266358  | -3.143004 | 1.930860  |
| H  | 3.826869  | -2.367630 | 1.610063  |
| C  | 0.039507  | -1.596862 | 2.792744  |
| H  | 0.099406  | -2.642095 | 2.480148  |
| H  | -1.005113 | -1.289567 | 2.715183  |
| H  | 0.326956  | -1.545729 | 3.850182  |
| N  | -1.728577 | 0.642706  | -0.257653 |
| N  | -1.870247 | -0.621332 | 0.133311  |
| C  | -2.633263 | 1.688911  | -0.162289 |
| C  | -4.310410 | 3.936064  | 0.031988  |
| C  | -2.321072 | 2.877348  | -0.858387 |
| C  | -3.792174 | 1.646265  | 0.644420  |
| C  | -4.613991 | 2.765404  | 0.733428  |
| C  | -3.158851 | 3.982082  | -0.761186 |
| H  | -1.428725 | 2.896763  | -1.475210 |
| H  | -4.033025 | 0.745372  | 1.196143  |
| H  | -5.500126 | 2.723277  | 1.360609  |
| H  | -2.913054 | 4.886616  | -1.310139 |
| H  | -4.961252 | 4.801803  | 0.105106  |
| C  | -2.989650 | -1.431803 | -0.104832 |
| C  | -5.130775 | -3.203408 | -0.525335 |
| C  | -3.026136 | -2.679020 | 0.546397  |
| C  | -4.032045 | -1.090796 | -0.989434 |

|   |           |           |           |
|---|-----------|-----------|-----------|
| C | -5.087746 | -1.975701 | -1.190739 |
| C | -4.089699 | -3.550584 | 0.339805  |
| H | -2.208658 | -2.948897 | 1.205592  |
| H | -4.002121 | -0.150151 | -1.525326 |
| H | -5.881031 | -1.704577 | -1.881542 |
| H | -4.103374 | -4.508297 | 0.851967  |
| H | -5.959556 | -3.885470 | -0.687842 |

#### IM4CC<sup>T</sup>

B3LYP/BS1 SCF energy: -2524.479179 a.u.

M06-L/BS2 SCF energy in solution:  
-2524.593798 a.u.

M06-L/BS2 Free energy in solution:  
-2524.291001 a.u.

|    |           |           |           |
|----|-----------|-----------|-----------|
| Ti | 1.135883  | -0.099688 | -0.571634 |
| C  | -2.596782 | 0.043576  | 0.225053  |
| C  | -5.142591 | -0.229238 | -0.869182 |
| C  | -3.692286 | 0.636704  | 0.860131  |
| C  | -2.765782 | -0.691604 | -0.951119 |
| C  | -4.045258 | -0.826374 | -1.491394 |
| C  | -4.965009 | 0.502706  | 0.306367  |
| H  | -3.544232 | 1.190857  | 1.781628  |
| H  | -1.907910 | -1.152358 | -1.431102 |
| H  | -4.178490 | -1.395653 | -2.405877 |
| H  | -5.816117 | 0.964879  | 0.796990  |
| H  | -6.134432 | -0.334294 | -1.298222 |
| Cl | 0.634915  | -2.284059 | -1.363317 |
| Cl | 0.730683  | 1.456445  | -2.292320 |
| C  | 0.601079  | -0.265845 | 1.948157  |
| N  | -1.289696 | 0.191628  | 0.808600  |
| C  | -0.583733 | -0.817233 | 1.463936  |
| C  | -1.155429 | -2.186344 | 1.639079  |
| H  | -0.545013 | -2.757222 | 2.340648  |
| H  | -1.180588 | -2.734394 | 0.692875  |
| H  | -2.173727 | -2.132440 | 2.037773  |
| C  | 1.600281  | -0.936715 | 2.848908  |
| H  | 1.411909  | -0.686448 | 3.900415  |
| H  | 2.620166  | -0.619359 | 2.616603  |
| H  | 1.561937  | -2.024552 | 2.755758  |
| C  | -0.547249 | 1.376873  | 0.842886  |

|   |           |           |           |
|---|-----------|-----------|-----------|
| C | 0.622370  | 1.124777  | 1.563289  |
| C | -1.083570 | 2.661749  | 0.299045  |
| H | -1.577086 | 2.512652  | -0.662691 |
| H | -0.267274 | 3.367295  | 0.140307  |
| H | -1.800419 | 3.116624  | 0.993295  |
| C | 1.630350  | 2.145021  | 2.015398  |
| H | 1.417901  | 2.476773  | 3.039596  |
| H | 1.620591  | 3.031563  | 1.376521  |
| H | 2.644505  | 1.737296  | 2.006916  |
| C | 3.385139  | -0.743749 | -0.269023 |
| C | 3.421511  | 0.453714  | -0.587704 |
| C | 3.822871  | -2.119858 | 0.035684  |
| H | 3.524356  | -2.425853 | 1.043038  |
| H | 3.377150  | -2.827107 | -0.667972 |
| H | 4.915682  | -2.188245 | -0.030013 |
| C | 3.935166  | 1.776872  | -0.991412 |
| H | 3.617704  | 2.561371  | -0.297824 |
| H | 5.031806  | 1.764263  | -1.014335 |
| H | 3.558383  | 2.045359  | -1.981340 |

**IM4PhCF<sub>3</sub><sup>T</sup>**

B3LYP/BS1 SCF energy: -2937.782985 a.u.  
M06-L/BS2 SCF energy in solution:  
-2937.965750 a.u.  
M06-L/BS2 Free energy in solution:  
-2937.651175 a.u.

|    |           |           |           |
|----|-----------|-----------|-----------|
| Ti | 0.447283  | -0.115173 | -0.477560 |
| C  | 3.857716  | 0.089349  | 0.040371  |
| C  | 6.455397  | -0.538374 | -0.727158 |
| C  | 4.926100  | 0.841437  | 0.538397  |
| C  | 4.074552  | -0.976721 | -0.833091 |
| C  | 5.382182  | -1.287363 | -1.211057 |
| C  | 6.226662  | 0.526126  | 0.147737  |
| H  | 4.735073  | 1.661575  | 1.223629  |
| H  | 3.230634  | -1.555530 | -1.195925 |
| H  | 5.556417  | -2.116544 | -1.889447 |
| H  | 7.059056  | 1.109664  | 0.528764  |
| H  | 7.469054  | -0.782954 | -1.029604 |
| Cl | -0.682516 | 1.072045  | -2.184361 |
| Cl | 0.734793  | -2.440612 | -0.834655 |

|   |           |           |           |
|---|-----------|-----------|-----------|
| C | 0.768628  | 1.778525  | 0.997970  |
| N | 2.515932  | 0.431237  | 0.458457  |
| C | 1.861082  | 1.640161  | 0.123881  |
| C | 2.397060  | 2.585915  | -0.902904 |
| H | 1.571206  | 3.132284  | -1.362012 |
| H | 2.926011  | 2.055853  | -1.697929 |
| H | 3.091011  | 3.312473  | -0.461168 |
| C | -0.184338 | 2.938807  | 1.028829  |
| H | 0.227867  | 3.773265  | 1.610036  |
| H | -1.135068 | 2.655561  | 1.486628  |
| H | -0.400403 | 3.298385  | 0.020030  |
| C | 1.853513  | -0.161463 | 1.558128  |
| C | 0.771853  | 0.651538  | 1.893233  |
| C | 2.377700  | -1.406769 | 2.195818  |
| H | 2.472096  | -2.218598 | 1.470583  |
| H | 1.695895  | -1.736665 | 2.980981  |
| H | 3.359557  | -1.228432 | 2.649417  |
| C | -0.202411 | 0.422379  | 3.013076  |
| H | 0.017752  | 1.080219  | 3.862089  |
| H | -0.168345 | -0.609013 | 3.369755  |
| H | -1.227346 | 0.623770  | 2.692950  |
| C | -4.275632 | -0.423497 | -0.038105 |
| C | -6.490248 | 1.243530  | -0.280451 |
| C | -4.270218 | 0.597998  | -0.995762 |
| C | -5.379598 | -0.614149 | 0.795419  |
| C | -6.488736 | 0.222965  | 0.670842  |
| C | -5.381792 | 1.429821  | -1.110789 |
| H | -3.402335 | 0.739468  | -1.633689 |
| H | -5.371157 | -1.412677 | 1.528547  |
| H | -7.350064 | 0.075197  | 1.315080  |
| H | -5.382554 | 2.223264  | -1.851703 |
| H | -7.355019 | 1.893638  | -0.376372 |
| C | -3.070308 | -1.311921 | 0.076380  |
| F | -3.225606 | -2.296921 | 0.979450  |
| F | -1.965197 | -0.582558 | 0.500738  |
| F | -2.721953 | -1.863097 | -1.091836 |

**Pyr<sup>2-</sup>**

B3LYP/BS1 SCF energy: -598.244917 a.u.  
M06-L/BS2 SCF energy in solution: not available

M06-L/BS2 Free energy in solution: not available

|   |           |           |           |
|---|-----------|-----------|-----------|
| C | -1.243768 | -0.000221 | -0.000173 |
| C | -4.157909 | 0.000191  | -0.000115 |
| C | -2.025099 | -1.047683 | 0.645823  |
| C | -2.024855 | 1.047427  | -0.646202 |
| C | -3.404131 | 1.018061  | -0.654981 |
| C | -3.404366 | -1.017953 | 0.654651  |
| C | 2.307634  | -0.687948 | 0.073936  |
| N | 0.117970  | -0.000066 | 0.000179  |
| C | 0.944245  | -1.178902 | 0.164729  |
| C | 0.526591  | -2.399931 | -0.609554 |
| C | 3.499376  | -1.596790 | 0.074299  |
| C | 0.944034  | 1.178987  | -0.164276 |
| C | 2.307533  | 0.688237  | -0.073645 |
| C | 0.526258  | 2.399720  | 0.610442  |
| C | 3.499337  | 1.596968  | -0.074992 |
| H | -1.485816 | -1.799049 | 1.217297  |
| H | -1.485285 | 1.798375  | -1.217984 |
| H | -3.935328 | 1.807997  | -1.198602 |
| H | -3.935751 | -1.807858 | 1.198126  |
| H | -5.247283 | 0.000415  | 0.000041  |
| H | 1.329166  | -3.153692 | -0.580066 |
| H | 0.309082  | -2.206672 | -1.693739 |
| H | -0.386831 | -2.893307 | -0.233909 |
| H | 4.448843  | -1.042737 | 0.084721  |
| H | 3.547390  | -2.279015 | -0.801165 |
| H | 3.500013  | -2.268675 | 0.954463  |
| H | -0.388121 | 2.892005  | 0.235786  |
| H | 1.328040  | 3.154291  | 0.579751  |
| H | 0.310407  | 2.206613  | 1.695002  |
| H | 3.545182  | 2.282551  | 0.797928  |
| H | 3.502561  | 2.265593  | -0.957700 |
| H | 4.448663  | 1.042647  | -0.080842 |

### Pyr

B3LYP/BS1 SCF energy: -598.501707 a.u.  
M06-L/BS2 SCF energy in solution: not available

M06-L/BS2 Free energy in solution: not available

|   |           |           |           |
|---|-----------|-----------|-----------|
| C | -1.260361 | 0.000012  | -0.000080 |
| C | -4.059940 | -0.000058 | 0.000281  |
| C | -1.964001 | -0.541488 | 1.082532  |
| C | -1.964314 | 0.541489  | -1.082518 |
| C | -3.359451 | 0.546713  | -1.076909 |
| C | -3.359155 | -0.546784 | 1.077283  |
| C | 2.284877  | -0.714596 | -0.073256 |
| N | 0.165237  | 0.000043  | -0.000280 |
| C | 0.970445  | -1.133098 | -0.112388 |
| C | 0.385935  | -2.499358 | -0.289676 |
| C | 3.515497  | -1.568680 | -0.167783 |
| C | 0.970445  | 1.133137  | 0.112122  |
| C | 2.284879  | 0.714610  | 0.073310  |
| C | 0.385948  | 2.499437  | 0.289121  |
| C | 3.515515  | 1.568627  | 0.168208  |
| H | -1.409996 | -0.944952 | 1.924181  |
| H | -1.410523 | 0.944984  | -1.924292 |
| H | -3.898892 | 0.969556  | -1.919549 |
| H | -3.898334 | -0.969660 | 1.920074  |
| H | -5.145979 | -0.000084 | 0.000404  |
| H | 1.178375  | -3.215579 | -0.518183 |
| H | -0.337309 | -2.531682 | -1.113393 |
| H | -0.134531 | -2.862773 | 0.605331  |
| H | 4.131642  | -1.496889 | 0.738130  |
| H | 4.155663  | -1.268502 | -1.007381 |
| H | 3.270668  | -2.625379 | -0.307762 |
| H | -0.134454 | 2.862673  | -0.605998 |
| H | 1.178387  | 3.215696  | 0.517513  |
| H | -0.337347 | 2.531966  | 1.112786  |
| H | 4.155030  | 1.268907  | 1.008471  |
| H | 3.270700  | 2.625440  | 0.307344  |
| H | 4.132324  | 1.496204  | -0.737198 |

### HMB<sup>2-</sup>

B3LYP/BS1 SCF energy: -467.858265 a.u.  
M06-L/BS2 SCF energy in solution: -468.194210 a.u.

M06-L/BS2 Free energy in solution:  
-467.982014 a.u.

|   |           |           |           |
|---|-----------|-----------|-----------|
| C | -1.246682 | -0.690007 | -0.111332 |
| C | 0.001081  | -1.483887 | -0.087206 |
| C | 1.247252  | -0.688892 | -0.110389 |
| C | -1.247258 | 0.688922  | -0.110438 |
| C | 1.246715  | 0.690032  | -0.111322 |
| C | -0.001085 | 1.483995  | -0.087324 |
| C | 0.000960  | -2.733842 | 0.769805  |
| H | 0.878286  | -3.375427 | 0.579832  |
| H | -0.000850 | -2.608938 | 1.914058  |
| H | -0.874853 | -3.376871 | 0.577491  |
| C | 2.512616  | -1.510046 | -0.302621 |
| H | 2.798645  | -2.082865 | 0.599572  |
| H | 2.337271  | -2.275590 | -1.087899 |
| H | 3.401622  | -0.927676 | -0.582275 |
| C | 2.509986  | 1.512683  | -0.309220 |
| H | 2.797569  | 2.089440  | 0.590092  |
| H | 3.399537  | 0.931314  | -0.589413 |
| H | 2.331017  | 2.275463  | -1.096527 |
| C | -0.001006 | 2.733760  | 0.770085  |
| H | -0.878108 | 3.375622  | 0.579945  |
| H | 0.000377  | 2.608508  | 1.914226  |
| H | 0.875012  | 3.376625  | 0.578172  |
| C | -2.512594 | 1.510038  | -0.302806 |
| H | -2.337577 | 2.274978  | -1.088785 |
| H | -3.401915 | 0.927613  | -0.581349 |
| H | -2.797958 | 2.083718  | 0.599054  |
| C | -2.509980 | -1.512705 | -0.309043 |
| H | -2.797712 | -2.089141 | 0.590423  |
| H | -3.399412 | -0.931366 | -0.589628 |
| H | -2.330974 | -2.275701 | -1.096122 |

### HMB

B3LYP/BS1 SCF energy: -468.161307 a.u.  
M06-L/BS2 SCF energy in solution:  
-468.190387 a.u.  
M06-L/BS2 Free energy in solution:  
-467.964689 a.u.

|   |           |           |           |
|---|-----------|-----------|-----------|
| C | -1.073411 | -0.911782 | -0.010255 |
| C | -1.326207 | 0.473672  | 0.010342  |
| C | -0.252868 | 1.385475  | -0.010094 |
| C | 1.073427  | 0.911776  | 0.010235  |
| C | 1.326232  | -0.473693 | -0.010377 |
| C | 0.252878  | -1.385497 | 0.010103  |
| C | -0.525208 | 2.877327  | -0.076677 |
| H | -0.603533 | 3.333165  | 0.920266  |
| H | 0.266207  | 3.407685  | -0.609951 |
| H | -1.457585 | 3.093593  | -0.601820 |
| C | 0.525130  | -2.877361 | 0.076788  |
| H | 0.603004  | -3.333332 | -0.920139 |
| H | 1.457681  | -3.093663 | 0.601586  |
| H | -0.266096 | -3.407588 | 0.610481  |
| C | -2.229512 | -1.893317 | -0.076829 |
| H | -1.950858 | -2.809195 | -0.601596 |
| H | -2.585455 | -2.188580 | 0.920138  |
| H | -3.084312 | -1.473029 | -0.610424 |
| C | -2.754342 | 0.983978  | 0.076889  |
| H | -3.187996 | 1.144479  | -0.920108 |
| H | -3.408097 | 0.284627  | 0.601664  |
| H | -2.817968 | 1.934371  | 0.610501  |
| C | 2.229514  | 1.893323  | 0.076842  |
| H | 2.585197  | 2.188884  | -0.920128 |
| H | 1.950957  | 2.809038  | 0.601953  |
| H | 3.084449  | 1.472910  | 0.610118  |
| C | 2.754390  | -0.983925 | -0.076986 |
| H | 3.407943  | -0.284821 | -0.602345 |
| H | 3.188323  | -1.143792 | 0.919991  |
| H | 2.818000  | -1.934602 | -0.610080 |

### TS1a

B3LYP/BS1 SCF energy: -2709.011926 a.u.  
M06-L/BS2 SCF energy in solution:  
-2709.167641 a.u.  
M06-L/BS2 Free energy in solution:  
-2708.861596 a.u.

|    |           |           |           |
|----|-----------|-----------|-----------|
| Ti | -0.358748 | -0.585523 | -0.111067 |
| N  | -2.525376 | 0.128504  | -0.191029 |
| C  | -5.146714 | 1.056797  | -0.436008 |

|    |           |           |           |                                         |           |           |           |
|----|-----------|-----------|-----------|-----------------------------------------|-----------|-----------|-----------|
| C  | -2.867006 | 1.356911  | 0.237828  | H                                       | -1.249144 | -2.651948 | 2.677062  |
| C  | -3.478430 | -0.643239 | -0.747089 | H                                       | -2.557994 | -1.496153 | 2.730343  |
| C  | -4.796521 | -0.214832 | -0.882499 | H                                       | -1.288022 | -1.412086 | 3.973743  |
| C  | -4.159408 | 1.858897  | 0.135303  |                                         |           |           |           |
| H  | -2.066779 | 1.945084  | 0.671249  | <b>TS1b</b>                             |           |           |           |
| H  | -3.154125 | -1.622760 | -1.078810 | B3LYP/BS1 SCF energy: -2709.012483 a.u. |           |           |           |
| H  | -5.526502 | -0.875727 | -1.336711 | M06-L/BS2 SCF energy in solution:       |           |           |           |
| H  | -4.379194 | 2.858174  | 0.495351  | -2709.166618 a.u.                       |           |           |           |
| H  | -6.166273 | 1.417852  | -0.532414 | M06-L/BS2 Free energy in solution:      |           |           |           |
| N  | 1.676457  | -1.595079 | -0.198535 | -2708.862161 a.u.                       |           |           |           |
| C  | 4.198947  | -2.773777 | -0.356362 |                                         |           |           |           |
| C  | 2.567005  | -1.191311 | -1.123311 | Ti                                      | 0.043247  | -0.600602 | -0.102993 |
| C  | 2.025043  | -2.587474 | 0.639297  | N                                       | 0.572283  | 1.748082  | -0.088595 |
| C  | 3.276966  | -3.193808 | 0.600393  | C                                       | 0.962350  | 4.521357  | -0.197753 |
| C  | 3.832913  | -1.757612 | -1.237093 | C                                       | 1.281128  | 2.312257  | -1.085016 |
| H  | 2.232261  | -0.407153 | -1.791993 | C                                       | 0.056144  | 2.563653  | 0.849498  |
| H  | 1.258948  | -2.912911 | 1.332160  | C                                       | 0.222909  | 3.944974  | 0.833955  |
| H  | 3.509256  | -3.989242 | 1.299931  | C                                       | 1.501656  | 3.685274  | -1.171666 |
| H  | 4.509549  | -1.404438 | -2.007451 | H                                       | 1.655483  | 1.628765  | -1.837975 |
| H  | 5.179894  | -3.235165 | -0.420013 | H                                       | -0.502088 | 2.078076  | 1.640878  |
| C  | 1.223586  | 2.096871  | 0.001846  | H                                       | -0.221671 | 4.548746  | 1.617915  |
| C  | 2.823963  | 4.397642  | -0.308476 | H                                       | 2.081138  | 4.080465  | -1.998974 |
| C  | 2.598181  | 2.072402  | 0.329759  | H                                       | 1.111797  | 5.596050  | -0.241204 |
| C  | 0.673008  | 3.300681  | -0.490544 | N                                       | 2.565528  | -0.690091 | -0.084595 |
| C  | 1.468391  | 4.432560  | -0.645485 | C                                       | 5.351684  | -0.947954 | -0.218088 |
| C  | 3.382782  | 3.212189  | 0.176510  | C                                       | 3.137378  | -1.699142 | -0.766445 |
| H  | 3.033576  | 1.147713  | 0.694526  | C                                       | 3.378070  | 0.188862  | 0.523871  |
| H  | -0.375800 | 3.315255  | -0.767964 | C                                       | 4.767591  | 0.103473  | 0.486351  |
| H  | 1.028850  | 5.346815  | -1.034206 | C                                       | 4.518274  | -1.863981 | -0.855561 |
| H  | 4.437999  | 3.174648  | 0.432662  | H                                       | 2.453909  | -2.389068 | -1.246800 |
| H  | 3.440443  | 5.283160  | -0.429027 | H                                       | 2.891071  | 0.998507  | 1.057006  |
| Cl | -0.509991 | -0.548956 | -2.479992 | H                                       | 5.369957  | 0.846195  | 0.998947  |
| Cl | -1.147329 | -2.951972 | -0.097408 | H                                       | 4.922038  | -2.698396 | -1.418804 |
| C  | -0.732186 | -0.690320 | 2.019766  | H                                       | 6.431764  | -1.049091 | -0.269562 |
| N  | 0.430724  | 0.973105  | 0.096566  | C                                       | -3.027312 | -0.257559 | -0.252015 |
| C  | -0.062808 | 0.387922  | 2.046603  | C                                       | -5.790638 | -0.149994 | -0.743316 |
| C  | 0.514930  | 1.496194  | 2.832936  | C                                       | -3.705092 | 0.979748  | -0.264882 |
| H  | 0.250382  | 1.328883  | 3.882956  | C                                       | -3.757642 | -1.441205 | -0.492553 |
| H  | 0.123672  | 2.469827  | 2.523780  | C                                       | -5.126226 | -1.380117 | -0.738428 |
| H  | 1.603508  | 1.543752  | 2.752663  | C                                       | -5.075126 | 1.027284  | -0.507982 |
| C  | -1.484350 | -1.612027 | 2.913696  | H                                       | -3.136760 | 1.889063  | -0.095251 |

|    |           |           |           |
|----|-----------|-----------|-----------|
| H  | -3.221833 | -2.384850 | -0.494999 |
| H  | -5.678140 | -2.295807 | -0.930388 |
| H  | -5.586814 | 1.985574  | -0.520994 |
| H  | -6.858470 | -0.108237 | -0.936318 |
| Cl | 0.142686  | -2.946862 | 0.027152  |
| Cl | 0.439919  | -0.487646 | -2.447852 |
| C  | 0.210397  | -0.490206 | 2.059209  |
| N  | -1.667362 | -0.323738 | -0.044149 |
| C  | -1.053355 | -0.404342 | 2.002903  |
| C  | -2.375321 | -0.430680 | 2.651670  |
| H  | -2.214699 | -0.474361 | 3.735062  |
| H  | -2.949211 | -1.310505 | 2.347348  |
| H  | -2.977994 | 0.452414  | 2.422259  |
| C  | 1.283770  | -0.702120 | 3.072885  |
| H  | 2.013913  | 0.112755  | 3.059913  |
| H  | 1.826580  | -1.623972 | 2.843327  |
| H  | 0.877339  | -0.779703 | 4.087912  |

### TS2a

B3LYP/BS1 SCF energy: -2616.692560 a.u.  
M06-L/BS2 SCF energy in solution:  
-2616.830823 a.u.  
M06-L/BS2 Free energy in solution:  
-2616.527940 a.u.

|    |           |           |           |
|----|-----------|-----------|-----------|
| Ti | 0.625982  | -0.991254 | -0.320948 |
| C  | -2.252584 | 0.591209  | -0.088131 |
| C  | -3.936699 | 2.809915  | -0.535744 |
| C  | -3.590530 | 0.583208  | 0.351440  |
| C  | -1.771152 | 1.741244  | -0.737544 |
| C  | -2.606751 | 2.834523  | -0.958761 |
| C  | -4.422174 | 1.677373  | 0.119643  |
| H  | -3.975544 | -0.276565 | 0.887764  |
| H  | -0.749103 | 1.753043  | -1.096361 |
| H  | -2.215387 | 3.706531  | -1.474873 |
| H  | -5.452339 | 1.645412  | 0.462981  |
| H  | -4.585942 | 3.661945  | -0.712526 |
| Cl | 0.444609  | -0.397718 | -2.576643 |
| Cl | 2.661713  | -2.075913 | -0.430076 |
| C  | -0.471875 | -2.586540 | -0.046142 |
| N  | -1.363483 | -0.472467 | 0.193890  |

|   |           |           |           |
|---|-----------|-----------|-----------|
| C | -1.610371 | -1.814359 | -0.124435 |
| C | -2.959117 | -2.291347 | -0.610006 |
| H | -2.851483 | -3.249900 | -1.119787 |
| H | -3.408170 | -1.575292 | -1.302694 |
| C | -0.345071 | -4.066877 | -0.204444 |
| H | -0.367010 | -4.559711 | 0.776948  |
| H | -1.153475 | -4.506601 | -0.803916 |
| C | -0.414866 | -0.345852 | 2.120189  |
| C | 0.667873  | -0.973372 | 1.959329  |
| C | -1.413304 | 0.442191  | 2.851829  |
| H | -1.030864 | 0.592498  | 3.869902  |
| H | -1.582145 | 1.426149  | 2.404854  |
| C | 1.820106  | -1.452470 | 2.781527  |
| H | 2.736719  | -0.937041 | 2.481253  |
| H | 1.994306  | -2.516137 | 2.599762  |
| H | 0.606590  | -4.329712 | -0.672978 |
| H | -3.657088 | -2.434710 | 0.223295  |
| N | 1.833415  | 1.126078  | 0.005734  |
| C | 2.788344  | 1.375041  | -0.912155 |
| C | 1.635102  | 2.043189  | 0.967493  |
| C | 3.564968  | 2.530137  | -0.897527 |
| H | 2.921916  | 0.619661  | -1.676967 |
| C | 2.360845  | 3.228130  | 1.051903  |
| H | 0.871788  | 1.803920  | 1.698447  |
| C | 3.347820  | 3.477773  | 0.100476  |
| H | 4.321969  | 2.675119  | -1.660429 |
| H | 2.152387  | 3.932340  | 1.850184  |
| H | 3.935389  | 4.390211  | 0.137057  |
| H | -2.381331 | -0.062942 | 2.918772  |
| H | 1.656844  | -1.292870 | 3.853392  |

### TS2b

B3LYP/BS1 SCF energy: -2616.706689 a.u.  
M06-L/BS2 SCF energy in solution:  
-2616.847931 a.u.  
M06-L/BS2 Free energy in solution:  
-2616.544834 a.u.

|    |           |           |           |
|----|-----------|-----------|-----------|
| Ti | -0.310584 | -0.108631 | -0.347529 |
| N  | -2.621830 | -0.352940 | 0.032504  |
| C  | -5.399941 | -0.608654 | 0.194344  |

|    |           |           |           |                                         |           |           |           |
|----|-----------|-----------|-----------|-----------------------------------------|-----------|-----------|-----------|
| C  | -3.383671 | 0.645583  | 0.511297  | H                                       | -1.340307 | 3.204994  | 1.804215  |
| C  | -3.236345 | -1.481974 | -0.369969 | H                                       | 0.407093  | 3.209081  | 2.056355  |
| C  | -4.616322 | -1.649071 | -0.299530 |                                         |           |           |           |
| C  | -4.768897 | 0.563832  | 0.606494  | <b>TS2c</b>                             |           |           |           |
| H  | -2.855522 | 1.535405  | 0.831568  | B3LYP/BS1 SCF energy: -2616.690190 a.u. |           |           |           |
| H  | -2.587684 | -2.261981 | -0.751045 | M06-L/BS2 SCF energy in solution:       |           |           |           |
| H  | -5.058779 | -2.581259 | -0.632937 | -2616.829158 a.u.                       |           |           |           |
| H  | -5.333028 | 1.403716  | 0.997198  | M06-L/BS2 Free energy in solution:      |           |           |           |
| H  | -6.479334 | -0.708169 | 0.256786  | -2616.523629 a.u.                       |           |           |           |
| C  | 2.890099  | -0.144604 | -0.067654 |                                         |           |           |           |
| C  | 5.494341  | -1.085661 | 0.425297  | Ti                                      | 0.383517  | -0.212817 | 0.020194  |
| C  | 3.831092  | 0.664220  | 0.598119  | C                                       | -2.781887 | -0.005756 | 0.196891  |
| C  | 3.268741  | -1.434960 | -0.474926 | C                                       | -5.335328 | -1.188784 | 0.207291  |
| C  | 4.559197  | -1.894685 | -0.225158 | C                                       | -3.940377 | 0.789569  | 0.262093  |
| C  | 5.121955  | 0.195469  | 0.835072  | C                                       | -2.924126 | -1.400979 | 0.109966  |
| H  | 3.537067  | 1.652117  | 0.940119  | C                                       | -4.190719 | -1.982333 | 0.117809  |
| H  | 2.541673  | -2.061199 | -0.977236 | C                                       | -5.202679 | 0.198686  | 0.277708  |
| H  | 4.837016  | -2.893874 | -0.548275 | H                                       | -3.854674 | 1.869429  | 0.286219  |
| H  | 5.835086  | 0.832669  | 1.350792  | H                                       | -2.039565 | -2.025330 | 0.052440  |
| H  | 6.499528  | -1.450623 | 0.613258  | H                                       | -4.278358 | -3.062984 | 0.058416  |
| Cl | -0.893999 | -0.295493 | -2.588322 | H                                       | -6.085218 | 0.829324  | 0.334735  |
| Cl | -0.021476 | -2.441907 | 0.034950  | H                                       | -6.320269 | -1.645483 | 0.216379  |
| C  | -0.067572 | 1.912411  | -0.431358 | Cl                                      | 0.262865  | -1.669668 | 1.844829  |
| N  | 1.585585  | 0.315186  | -0.291642 | Cl                                      | 0.752325  | -1.927809 | -1.583970 |
| C  | 1.247768  | 1.602483  | -0.701976 | C                                       | 0.415067  | 1.560960  | 0.982738  |
| C  | 2.137360  | 2.373138  | -1.651068 | N                                       | -1.481414 | 0.558474  | 0.124516  |
| H  | 1.871804  | 2.102260  | -2.680404 | C                                       | -0.951418 | 1.503760  | 1.045439  |
| H  | 3.192114  | 2.138425  | -1.502316 | C                                       | -1.849377 | 2.246050  | 2.004959  |
| H  | 1.989394  | 3.450116  | -1.538903 | H                                       | -1.256633 | 2.685941  | 2.807863  |
| C  | -0.802886 | 3.086578  | -0.998901 | H                                       | -2.591115 | 1.578687  | 2.451395  |
| H  | -1.051866 | 2.902280  | -2.053456 | C                                       | 1.286868  | 2.463486  | 1.798261  |
| H  | -0.225478 | 4.019783  | -0.950778 | H                                       | 1.695050  | 3.279815  | 1.187025  |
| H  | -1.753636 | 3.266832  | -0.485504 | H                                       | 0.758391  | 2.935359  | 2.635937  |
| C  | -0.386361 | 0.030832  | 2.091360  | C                                       | -0.928848 | 1.096636  | -1.841999 |
| C  | -0.443896 | 1.258112  | 1.940595  | C                                       | 0.337402  | 1.097393  | -1.820349 |
| C  | -0.363680 | -1.184214 | 2.934773  | C                                       | -2.214339 | 1.093358  | -2.551561 |
| H  | 0.567153  | -1.735985 | 2.787678  | H                                       | -2.005620 | 1.370585  | -3.592643 |
| H  | -1.174788 | -1.864083 | 2.665047  | H                                       | -2.669546 | 0.098429  | -2.557475 |
| H  | -0.459605 | -0.908418 | 3.991001  | C                                       | 1.419443  | 1.401913  | -2.805219 |
| C  | -0.518709 | 2.682299  | 2.301393  | H                                       | 2.024356  | 0.505637  | -2.971586 |
| H  | -0.681916 | 2.751076  | 3.384514  | H                                       | 2.085134  | 2.188448  | -2.434206 |



|   |           |           |           |
|---|-----------|-----------|-----------|
| H | 2.141636  | 1.921859  | 2.216323  |
| H | -2.389128 | 3.060384  | 1.506782  |
| N | 2.696156  | -0.197242 | 0.195244  |
| C | 3.438735  | 0.890109  | -0.076893 |
| C | 3.338745  | -1.339111 | 0.512007  |
| C | 4.829884  | 0.884233  | -0.049852 |
| H | 2.888368  | 1.789400  | -0.320216 |
| C | 4.726050  | -1.426839 | 0.570182  |
| H | 2.709335  | -2.194660 | 0.721892  |
| C | 5.489267  | -0.297391 | 0.282069  |
| H | 5.375740  | 1.792113  | -0.282479 |
| H | 5.189517  | -2.370965 | 0.834079  |
| H | 6.573815  | -0.336779 | 0.315699  |
| H | -2.941367 | 1.800091  | -2.142967 |
| H | 1.017182  | 1.731384  | -3.770035 |

#### TiCl<sub>2</sub>Py

B3LYP/BS1 SCF energy: -2018.229356 a.u.  
M06-L/BS2 SCF energy in solution:  
-2018.295213 a.u.  
M06-L/BS2 Free energy in solution:  
-2018.241903 a.u.

|    |           |           |           |
|----|-----------|-----------|-----------|
| Ti | 1.136183  | 0.000011  | 0.117956  |
| N  | -0.878634 | 0.000221  | -0.239679 |
| C  | -3.660467 | -0.000035 | 0.115684  |
| C  | -1.574796 | 1.170746  | -0.125105 |
| C  | -1.574328 | -1.170376 | -0.123022 |
| C  | -2.948916 | -1.201118 | 0.042097  |
| C  | -2.949350 | 1.201239  | 0.039945  |
| H  | -0.991158 | 2.081285  | -0.209053 |
| H  | -0.990385 | -2.080857 | -0.205476 |
| H  | -3.452829 | -2.159177 | 0.107036  |
| H  | -3.453672 | 2.159194  | 0.103180  |
| H  | -4.738548 | -0.000115 | 0.234540  |
| Cl | 2.089438  | 2.030072  | -0.018299 |
| Cl | 2.088688  | -2.030358 | -0.019648 |

#### TiCl<sub>2</sub>Py<sup>T</sup>

B3LYP/BS1 SCF energy: -2018.260745 a.u.

M06-L/BS2 SCF energy in solution:  
-2018.323004 a.u.

M06-L/BS2 Free energy in solution:  
-2018.270759 a.u.

|    |           |           |           |
|----|-----------|-----------|-----------|
| Ti | 1.262323  | 0.000005  | -0.000023 |
| N  | -0.866786 | 0.000000  | -0.000378 |
| C  | -3.666413 | -0.000044 | 0.000086  |
| C  | -1.565859 | -1.163736 | -0.000215 |
| C  | -1.565894 | 1.163713  | -0.000097 |
| C  | -2.952774 | 1.199509  | 0.000172  |
| C  | -2.952735 | -1.199576 | 0.000054  |
| H  | -0.974297 | -2.073427 | -0.000276 |
| H  | -0.974362 | 2.073422  | -0.000070 |
| H  | -3.459455 | 2.158213  | 0.000492  |
| H  | -3.459388 | -2.158295 | 0.000280  |
| H  | -4.751464 | -0.000062 | 0.000271  |
| Cl | 2.004096  | -2.164083 | 0.000107  |
| Cl | 2.003987  | 2.164133  | 0.000037  |

#### TiCl<sub>2</sub>(Py)<sub>4</sub>

B3LYP/BS1 SCF energy: -2763.220983 a.u.  
M06-L/BS2 SCF energy in solution:  
-2763.372299 a.u.

M06-L/BS2 Free energy in solution:  
-2763.067944 a.u.

|    |           |           |           |
|----|-----------|-----------|-----------|
| Ti | 0.000002  | 0.000000  | -0.000488 |
| Cl | -0.000025 | -0.000069 | -2.403828 |
| Cl | 0.000043  | 0.000063  | 2.403242  |
| N  | -1.602874 | -1.531009 | -0.000132 |
| N  | -1.531010 | 1.602871  | -0.000220 |
| N  | 1.602875  | 1.531013  | -0.000262 |
| N  | 1.531013  | -1.602876 | -0.000174 |
| C  | -1.672807 | -2.491465 | -0.958242 |
| H  | -0.901413 | -2.453116 | -1.717390 |
| C  | -2.666026 | -3.460521 | -0.995681 |
| H  | -2.660075 | -4.193113 | -1.796137 |
| C  | -3.643452 | -3.481267 | 0.000751  |
| H  | -4.427998 | -4.231241 | 0.001187  |
| C  | -3.578269 | -2.505092 | 0.996525  |

|   |           |           |           |    |           |           |           |
|---|-----------|-----------|-----------|----|-----------|-----------|-----------|
| H | -4.309616 | -2.465515 | 1.797155  | Ti | -0.000064 | 0.000163  | 0.000375  |
| C | -2.565294 | -1.556711 | 0.958192  | Cl | 0.000431  | -0.000119 | 2.501110  |
| H | -2.491887 | -0.786991 | 1.716488  | Cl | 0.000589  | 0.000274  | -2.502379 |
| C | -1.556738 | 2.565325  | 0.958070  | N  | -2.280794 | 0.111904  | 0.001391  |
| H | -0.787034 | 2.491948  | 1.716385  | N  | -0.111705 | -2.267432 | -0.000028 |
| C | -2.505125 | 3.578296  | 0.996347  | N  | 2.281038  | -0.111986 | 0.001412  |
| H | -2.465568 | 4.309671  | 1.796953  | N  | 0.111626  | 2.267829  | 0.000156  |
| C | -3.481281 | 3.643439  | 0.000552  | C  | -2.958705 | 0.621807  | 1.055150  |
| H | -4.231259 | 4.427981  | 0.000945  | H  | -2.348685 | 0.948401  | 1.889732  |
| C | -3.460508 | 2.665978  | -0.995845 | C  | -4.345948 | 0.707262  | 1.091775  |
| H | -4.193084 | 2.659993  | -1.796316 | H  | -4.830458 | 1.126535  | 1.967232  |
| C | -2.491449 | 1.672765  | -0.958352 | C  | -5.085053 | 0.251677  | 0.000407  |
| H | -2.453080 | 0.901345  | -1.717472 | H  | -6.169532 | 0.305852  | -0.000021 |
| C | 2.565327  | 1.556768  | 0.958028  | C  | -4.394182 | -0.275392 | -1.090357 |
| H | 2.491949  | 0.787085  | 1.716366  | H  | -4.917369 | -0.644490 | -1.966144 |
| C | 3.578297  | 2.505157  | 0.996281  | C  | -3.005335 | -0.328424 | -1.052681 |
| H | 4.309671  | 2.465624  | 1.796889  | H  | -2.430229 | -0.714632 | -1.886524 |
| C | 3.643440  | 3.481284  | 0.000457  | C  | 0.376819  | -2.996567 | -1.029353 |
| H | 4.427982  | 4.231263  | 0.000830  | H  | 0.796746  | -2.424700 | -1.849109 |
| C | 2.665981  | 3.460482  | -0.995941 | C  | 0.328244  | -4.385842 | -1.065780 |
| H | 2.659998  | 4.193035  | -1.796433 | H  | 0.739610  | -4.911550 | -1.921203 |
| C | 1.672769  | 2.491422  | -0.958421 | C  | -0.254823 | -5.074359 | -0.002155 |
| H | 0.901350  | 2.453031  | -1.717541 | H  | -0.310332 | -6.158810 | -0.003114 |
| C | 2.491440  | -1.672809 | -0.958312 | C  | -0.764532 | -4.331766 | 1.062796  |
| H | 2.453067  | -0.901417 | -1.717461 | H  | -1.227171 | -4.814202 | 1.917528  |
| C | 3.460496  | -2.666026 | -0.995777 | C  | -0.671372 | -2.944734 | 1.028524  |
| H | 4.193065  | -2.660075 | -1.796255 | H  | -1.030352 | -2.334485 | 1.849620  |
| C | 3.481274  | -3.643450 | 0.000656  | C  | 3.005750  | 0.329701  | -1.051906 |
| H | 4.231250  | -4.427995 | 0.001072  | H  | 2.430853  | 0.717344  | -1.885217 |
| C | 2.505128  | -3.578267 | 0.996459  | C  | 4.394598  | 0.276251  | -1.089558 |
| H | 2.465576  | -4.309612 | 1.797092  | H  | 4.918024  | 0.646421  | -1.964748 |
| C | 1.556744  | -2.565293 | 0.958151  | C  | 5.085144  | -0.252713 | 0.000484  |
| H | 0.787046  | -2.491885 | 1.716470  | H  | 6.169605  | -0.307284 | 0.000073  |
|   |           |           |           | C  | 4.345815  | -0.709693 | 1.091108  |
|   |           |           |           | H  | 4.830136  | -1.130385 | 1.965987  |
|   |           |           |           | C  | 2.958595  | -0.623718 | 1.054449  |
|   |           |           |           | H  | 2.348351  | -0.951387 | 1.888442  |
|   |           |           |           | C  | 0.671252  | 2.945139  | 1.028718  |
|   |           |           |           | H  | 1.030626  | 2.334847  | 1.849612  |
|   |           |           |           | C  | 0.763928  | 4.332207  | 1.063199  |
|   |           |           |           | H  | 1.226534  | 4.814659  | 1.917941  |

**TiCl<sub>2</sub>(Py)<sub>4</sub><sup>T</sup>**  
B3LYP/BS1 SCF energy: -2763.240076 a.u.  
M06-L/BS2 SCF energy in solution:  
-2763.383410 a.u.  
M06-L/BS2 Free energy in solution:  
-2763.082325 a.u.

|   |           |          |           |
|---|-----------|----------|-----------|
| C | 0.253803  | 5.074798 | -0.001545 |
| H | 0.308931  | 6.159268 | -0.002331 |
| C | -0.329158 | 4.386257 | -1.065212 |
| H | -0.740806 | 4.911961 | -1.920504 |
| C | -0.377257 | 2.996965 | -1.029006 |
| H | -0.797073 | 2.425069 | -1.848801 |

**C<sub>2</sub>H<sub>4</sub>-TiCl<sub>2</sub>Py<sup>S</sup>**

B3LYP/BS1 SCF energy: -2096.897929 a.u.  
M06-L/BS2 SCF energy in solution:  
-2096.968597 a.u.  
M06-L/BS2 Free energy in solution:  
-2096.864771 a.u.

|    |           |           |           |
|----|-----------|-----------|-----------|
| Ti | -1.167710 | 0.000056  | 0.009964  |
| N  | 1.053539  | -0.000695 | 0.037425  |
| C  | 3.852860  | -0.000017 | 0.000911  |
| C  | 1.750542  | -1.157677 | 0.022899  |
| C  | 1.750079  | 1.156639  | 0.027736  |
| C  | 3.139216  | 1.197292  | 0.011099  |
| C  | 3.139746  | -1.197626 | 0.006327  |
| H  | 1.163107  | -2.068980 | 0.019351  |
| H  | 1.162296  | 2.067730  | 0.028126  |
| H  | 3.643867  | 2.157076  | 0.003471  |
| H  | 3.644804  | -2.157159 | -0.005137 |
| H  | 4.938126  | 0.000251  | -0.012296 |
| Cl | -1.506871 | -2.022197 | -0.956020 |
| Cl | -1.505070 | 2.017343  | -0.966682 |
| C  | -2.354370 | 0.005219  | 1.735687  |
| C  | -0.967543 | 0.006351  | 2.112799  |
| H  | -0.510107 | -0.903839 | 2.501984  |
| H  | -0.510084 | 0.918975  | 2.496270  |
| H  | -2.938643 | -0.908795 | 1.836930  |
| H  | -2.938705 | 0.919800  | 1.831310  |

**C<sub>2</sub>H<sub>4</sub>-TiCl<sub>2</sub>Py<sup>T</sup>**

B3LYP/BS1 SCF energy: -2096.882492 a.u.  
M06-L/BS2 SCF energy in solution:  
-2096.945677 a.u.  
M06-L/BS2 Free energy in solution:  
-2096.845452 a.u.

|    |           |           |           |
|----|-----------|-----------|-----------|
| Ti | -1.095594 | 0.000871  | -0.019704 |
| N  | 1.103503  | 0.000050  | 0.072850  |
| C  | 3.895608  | -0.001437 | 0.022984  |
| C  | 1.795468  | -1.159957 | 0.051108  |
| C  | 1.796719  | 1.159319  | 0.052295  |
| C  | 3.185816  | 1.198995  | 0.031141  |
| C  | 3.184526  | -1.201104 | 0.030012  |
| H  | 1.200738  | -2.067479 | 0.034346  |
| H  | 1.202981  | 2.067506  | 0.036730  |
| H  | 3.694276  | 2.156572  | 0.013979  |
| H  | 3.691949  | -2.159214 | 0.011893  |
| H  | 4.980945  | -0.002016 | 0.004327  |
| Cl | -1.542335 | -2.033005 | -1.048715 |
| Cl | -1.541350 | 2.035699  | -1.046376 |
| C  | -2.469289 | -0.007730 | 1.914973  |
| C  | -1.155323 | 0.003214  | 2.325691  |
| H  | -0.646910 | -0.915230 | 2.611827  |
| H  | -0.660677 | 0.931008  | 2.605892  |
| H  | -3.024765 | -0.937683 | 1.828623  |
| H  | -3.038483 | 0.913428  | 1.823230  |

**IM3a**

B3LYP/BS1 SCF energy: -1410.316383a.u.  
M06-L/BS2 SCF energy in solution:  
-1410.517123 a.u.  
M06-L/BS2 Free energy in solution:  
-1410.064831 a.u.

|    |           |          |           |
|----|-----------|----------|-----------|
| Pd | -0.342791 | 0.180514 | 0.201139  |
| C  | 0.715041  | 1.905574 | -0.029026 |
| N  | 1.364014  | 2.873082 | -0.122039 |
| C  | 2.244928  | 4.020054 | -0.154371 |
| C  | 2.327946  | 4.516828 | -1.609013 |
| C  | 3.624345  | 3.564342 | 0.356208  |
| C  | 1.645384  | 5.100830 | 0.763945  |
| H  | 0.652863  | 5.400976 | 0.416551  |
| H  | 2.294685  | 5.981069 | 0.761571  |
| H  | 1.560055  | 4.733351 | 1.789963  |
| H  | 2.725618  | 3.737112 | -2.264085 |
| H  | 2.991788  | 5.384641 | -1.659931 |

|   |           |           |           |                                         |           |           |           |
|---|-----------|-----------|-----------|-----------------------------------------|-----------|-----------|-----------|
| H | 1.341686  | 4.812439  | -1.977502 | C                                       | -5.332247 | 0.234608  | -1.117710 |
| H | 3.547613  | 3.166211  | 1.371018  | H                                       | -4.864685 | -0.105638 | -2.045513 |
| H | 4.310637  | 4.416319  | 0.361092  | H                                       | -5.218716 | -0.550131 | -0.365481 |
| H | 4.038456  | 2.784925  | -0.288553 | H                                       | -6.398646 | 0.393887  | -1.302357 |
| C | 1.356999  | -0.903715 | 0.464759  | C                                       | -5.336302 | 2.029026  | 0.679446  |
| N | 1.647378  | -1.895141 | -0.531794 | H                                       | -4.857142 | 2.944481  | 1.037455  |
| N | 2.211203  | -0.816593 | 1.414049  | H                                       | -6.397300 | 2.234764  | 0.511596  |
| O | 1.893509  | 0.237128  | 2.310694  | H                                       | -5.249624 | 1.262576  | 1.453977  |
| C | 2.690291  | 0.080335  | 3.475750  | N                                       | -3.294833 | 1.288966  | -0.375750 |
| H | 3.760763  | 0.089522  | 3.234877  | N                                       | -2.981146 | -3.004265 | 1.471732  |
| H | 2.448755  | 0.932037  | 4.117205  |                                         |           |           |           |
| H | 2.452039  | -0.851358 | 4.003111  |                                         |           |           |           |
| C | 0.750497  | -2.933850 | -0.690456 | <b>TS3a</b>                             |           |           |           |
| O | 0.986282  | -3.918774 | -1.392433 | B3LYP/BS1 SCF energy: -1410.292751 a.u. |           |           |           |
| C | 2.936998  | -1.882627 | -1.328227 | M06-L/BS2 SCF energy in solution:       |           |           |           |
| C | 3.844713  | -3.032946 | -0.854793 | -1410.497861 a.u.                       |           |           |           |
| H | 4.780905  | -3.027936 | -1.424815 | M06-L/BS2 Free energy in solution:      |           |           |           |
| H | 4.084538  | -2.909959 | 0.205230  | -1410.047671 a.u.                       |           |           |           |
| H | 3.351573  | -3.994675 | -1.000838 | Pd                                      | -0.181121 | 0.346490  | 0.186852  |
| C | 3.672748  | -0.544004 | -1.140169 | C                                       | 1.258071  | 1.774291  | 0.046108  |
| H | 3.030512  | 0.303678  | -1.401116 | N                                       | 2.071057  | 2.619726  | 0.013129  |
| H | 4.027129  | -0.408132 | -0.118825 | C                                       | 3.083395  | 3.649845  | -0.001873 |
| H | 4.534243  | -0.536339 | -1.815420 | C                                       | 4.308574  | 3.104868  | -0.759485 |
| C | 2.606453  | -2.014405 | -2.831177 | C                                       | 3.444215  | 3.980543  | 1.458480  |
| H | 3.536301  | -1.960817 | -3.407490 | C                                       | 2.500946  | 4.883387  | -0.716409 |
| H | 2.110173  | -2.956936 | -3.052133 | H                                       | 2.219404  | 4.639292  | -1.744399 |
| H | 1.960897  | -1.189011 | -3.151364 | H                                       | 3.249473  | 5.680840  | -0.740870 |
| C | -0.553795 | -2.865848 | 0.070906  | H                                       | 1.615955  | 5.253119  | -0.191317 |
| C | -1.152608 | -1.681919 | 0.532820  | H                                       | 4.704017  | 2.212509  | -0.267158 |
| C | -1.194385 | -4.092659 | 0.292558  | H                                       | 5.093193  | 3.866913  | -0.782701 |
| C | -2.361351 | -1.839560 | 1.237833  | H                                       | 4.045373  | 2.845746  | -1.788612 |
| C | -2.395275 | -4.110542 | 0.992688  | H                                       | 2.567659  | 4.343397  | 2.002043  |
| H | -0.741020 | -5.003390 | -0.082998 | H                                       | 4.213227  | 4.758470  | 1.477278  |
| H | -2.866511 | -0.964637 | 1.643989  | H                                       | 3.829306  | 3.095758  | 1.972152  |
| H | -2.910638 | -5.050984 | 1.181968  | C                                       | 0.879225  | -1.415811 | 0.515077  |
| C | -2.195512 | 0.963360  | -0.147911 | N                                       | 1.151017  | -2.155538 | -0.695915 |
| C | -4.694992 | 1.551664  | -0.636529 | N                                       | 1.628173  | -1.691939 | 1.536308  |
| C | -4.782712 | 2.640566  | -1.720432 | O                                       | 1.264705  | -0.894627 | 2.638555  |
| H | -5.833565 | 2.851974  | -1.937859 | C                                       | 1.939031  | -1.382360 | 3.791111  |
| H | -4.305336 | 3.565474  | -1.384754 | H                                       | 3.026811  | -1.349230 | 3.655838  |
| H | -4.297284 | 2.311021  | -2.643034 | H                                       | 1.647450  | -0.716897 | 4.607218  |

|   |           |           |           |             |                                         |           |           |
|---|-----------|-----------|-----------|-------------|-----------------------------------------|-----------|-----------|
| H | 1.637545  | -2.409542 | 4.027570  | <b>IM3b</b> |                                         |           |           |
| C | 0.045548  | -2.802184 | -1.223232 |             | B3LYP/BS1 SCF energy: -1227.805339 a.u. |           |           |
| O | 0.026792  | -3.487542 | -2.242155 |             | M06-L/BS2 SCF energy in solution:       |           |           |
| C | 2.472495  | -2.161097 | -1.421255 |             | -1227.962115 a.u.                       |           |           |
| C | 2.991802  | -3.610930 | -1.481352 |             | M06-L/BS2 Free energy in solution:      |           |           |
| H | 3.951246  | -3.638389 | -2.009732 |             | -1227.49623 a.u.                        |           |           |
| H | 3.144839  | -3.999447 | -0.470004 |             |                                         |           |           |
| H | 2.285194  | -4.254767 | -2.006721 | Pd          | -0.528885                               | -0.148128 | -0.108154 |
| C | 3.507818  | -1.286020 | -0.698421 | C           | -2.415907                               | 0.420602  | -0.229258 |
| H | 3.163781  | -0.253442 | -0.599213 | N           | -3.537098                               | 0.757619  | -0.254782 |
| H | 3.738951  | -1.665696 | 0.296867  | C           | -4.934594                               | 1.125541  | -0.282389 |
| H | 4.422670  | -1.286312 | -1.300149 | C           | -1.045664                               | -2.101481 | -0.504229 |
| C | 2.262720  | -1.593000 | -2.841314 | C           | 0.408672                                | -2.847996 | 1.382624  |
| H | 3.217958  | -1.589068 | -3.377123 | C           | 1.370155                                | -1.893730 | 1.241737  |
| H | 1.548526  | -2.193132 | -3.404471 | C           | 0.304506                                | 1.724757  | 0.325744  |
| H | 1.896354  | -0.562264 | -2.787050 | C           | 1.966142                                | 3.668913  | 0.845369  |
| C | -1.116623 | -2.618700 | -0.307203 | N           | 0.968312                                | 2.648980  | 0.594233  |
| C | -0.968014 | -1.595681 | 0.640851  | N           | 1.333450                                | -0.990657 | 0.165194  |
| C | -2.169101 | -3.524168 | -0.218304 | C           | -0.577323                               | -3.083871 | 0.298857  |
| C | -1.862555 | -1.618828 | 1.734144  | C           | -1.840044                               | -2.296651 | -1.771639 |
| C | -3.044177 | -3.391789 | 0.859634  | H           | -1.977292                               | -3.348367 | -2.046703 |
| H | -2.263906 | -4.323581 | -0.946480 | H           | -2.834802                               | -1.834598 | -1.708805 |
| H | -1.761077 | -0.899287 | 2.542152  | H           | -1.330796                               | -1.810939 | -2.614106 |
| H | -3.892458 | -4.064583 | 0.970651  | C           | -0.979511                               | -4.542916 | 0.120614  |
| C | -1.950173 | 1.357881  | -0.184995 | H           | -0.103046                               | -5.169935 | -0.089131 |
| C | -4.374455 | 2.247328  | -0.607379 | H           | -1.438954                               | -4.940800 | 1.032958  |
| C | -4.381840 | 3.128115  | -1.870051 | H           | -1.695894                               | -4.690210 | -0.688342 |
| H | -5.399298 | 3.479817  | -2.064105 | C           | 0.324684                                | -3.718346 | 2.618412  |
| H | -3.731902 | 3.998044  | -1.740949 | H           | -0.695906                               | -3.731200 | 3.025092  |
| H | -4.037863 | 2.562247  | -2.740018 | H           | 0.591652                                | -4.764427 | 2.417146  |
| C | -5.263511 | 1.003593  | -0.796823 | H           | 0.983113                                | -3.366836 | 3.414756  |
| H | -4.936154 | 0.421007  | -1.662156 | C           | 2.426294                                | -1.627965 | 2.309228  |
| H | -5.225948 | 0.361196  | 0.086875  | H           | 1.966797                                | -1.173173 | 3.197339  |
| H | -6.299483 | 1.316114  | -0.958916 | H           | 2.942028                                | -2.535513 | 2.640438  |
| C | -4.814034 | 3.054176  | 0.628416  | H           | 3.181271                                | -0.933268 | 1.938463  |
| H | -4.164361 | 3.920953  | 0.777947  | C           | 2.416423                                | -0.803298 | -0.664691 |
| H | -5.839365 | 3.408179  | 0.487132  | C           | 2.393732                                | 0.185268  | -1.686300 |
| H | -4.780913 | 2.433798  | 1.527950  | C           | 3.598383                                | -1.589795 | -0.580138 |
| N | -3.020222 | 1.793950  | -0.383954 | C           | 3.497461                                | 0.418867  | -2.501271 |
| N | -2.884706 | -2.476729 | 1.831824  | H           | 1.477450                                | 0.743936  | -1.850724 |
|   |           |           |           | C           | 4.696990                                | -1.337907 | -1.397622 |

|                                        |           |           |           |   |           |           |           |
|----------------------------------------|-----------|-----------|-----------|---|-----------|-----------|-----------|
| H                                      | 3.634710  | -2.418139 | 0.118366  | C | 0.103515  | -2.147003 | -0.202817 |
| C                                      | 4.674169  | -0.323447 | -2.357784 | C | 1.109614  | -2.346629 | 1.960156  |
| H                                      | 3.428130  | 1.181085  | -3.275086 | C | 1.891731  | -1.305181 | 1.521081  |
| H                                      | 5.581566  | -1.962363 | -1.291204 | C | -0.073434 | 1.987254  | 0.210220  |
| H                                      | 5.531720  | -0.140460 | -2.998012 | C | 0.380211  | 4.521999  | 0.679432  |
| C                                      | 3.077677  | 3.028453  | 1.697661  | N | 0.105023  | 3.128998  | 0.415632  |
| H                                      | 2.681499  | 2.678452  | 2.654786  | N | 1.611736  | -0.855862 | 0.223133  |
| H                                      | 3.523199  | 2.180444  | 1.171861  | C | 0.278832  | -2.913991 | 0.921064  |
| H                                      | 3.856880  | 3.771091  | 1.893556  | C | -0.073079 | -2.638356 | -1.610367 |
| C                                      | 1.291615  | 4.832528  | 1.590827  | H | 0.151963  | -3.708198 | -1.709397 |
| H                                      | 2.030447  | 5.614338  | 1.788472  | H | -1.083133 | -2.447395 | -1.996897 |
| H                                      | 0.483584  | 5.263105  | 0.992650  | H | 0.618836  | -2.101346 | -2.271538 |
| H                                      | 0.878439  | 4.496639  | 2.546017  | C | -0.219996 | -4.340042 | 1.020731  |
| C                                      | 2.516617  | 4.121590  | -0.520060 | H | 0.594716  | -5.057479 | 1.193420  |
| H                                      | 1.724945  | 4.564039  | -1.131634 | H | -0.925875 | -4.461131 | 1.853795  |
| H                                      | 3.296931  | 4.872738  | -0.366277 | H | -0.744717 | -4.648427 | 0.112671  |
| H                                      | 2.944895  | 3.272218  | -1.058487 | C | 1.132102  | -2.917887 | 3.353203  |
| C                                      | -5.184382 | 2.132203  | 0.855776  | H | 0.175708  | -2.759169 | 3.871262  |
| H                                      | -4.574714 | 3.029967  | 0.721464  | H | 1.302128  | -4.001643 | 3.341715  |
| H                                      | -6.238238 | 2.425366  | 0.859491  | H | 1.913733  | -2.473291 | 3.973622  |
| H                                      | -4.943221 | 1.688779  | 1.825604  | C | 2.859850  | -0.494094 | 2.345366  |
| C                                      | -5.231923 | 1.760996  | -1.653252 | H | 2.378367  | 0.416659  | 2.732963  |
| H                                      | -5.026542 | 1.054698  | -2.462044 | H | 3.241626  | -1.054712 | 3.202531  |
| H                                      | -6.286387 | 2.047924  | -1.701053 | H | 3.717540  | -0.169601 | 1.749662  |
| H                                      | -4.621083 | 2.654608  | -1.808086 | C | 2.613363  | -0.669039 | -0.728628 |
| C                                      | -5.765675 | -0.154581 | -0.076375 | C | 2.390411  | 0.141255  | -1.862900 |
| H                                      | -5.567199 | -0.878871 | -0.870846 | C | 3.859050  | -1.333397 | -0.631038 |
| H                                      | -5.529545 | -0.620021 | 0.884207  | C | 3.380742  | 0.309561  | -2.829721 |
| H                                      | -6.830543 | 0.095598  | -0.090599 | H | 1.427154  | 0.633084  | -1.968359 |
|                                        |           |           |           | C | 4.846752  | -1.141390 | -1.592346 |
|                                        |           |           |           | H | 4.027588  | -2.008306 | 0.201800  |
|                                        |           |           |           | C | 4.621504  | -0.317814 | -2.699998 |
|                                        |           |           |           | H | 3.178329  | 0.940099  | -3.692311 |
|                                        |           |           |           | H | 5.797765  | -1.657667 | -1.485066 |
|                                        |           |           |           | H | 5.391947  | -0.181627 | -3.453183 |
|                                        |           |           |           | C | 1.672654  | 4.601519  | 1.513499  |
|                                        |           |           |           | H | 1.555784  | 4.066959  | 2.460052  |
|                                        |           |           |           | H | 2.512533  | 4.162272  | 0.968897  |
|                                        |           |           |           | H | 1.905543  | 5.648278  | 1.730711  |
|                                        |           |           |           | C | -0.812610 | 5.106154  | 1.458845  |
|                                        |           |           |           | H | -0.627909 | 6.162607  | 1.675056  |
| <b>TS3b</b>                            |           |           |           |   |           |           |           |
| B3LYP/BS1 SCF energy: -1227.785839a.u. |           |           |           |   |           |           |           |
| M06-L/BS2 SCF energy in solution:      |           |           |           |   |           |           |           |
| -1227.939163a.u.                       |           |           |           |   |           |           |           |
| M06-L/BS2 Free energy in solution:     |           |           |           |   |           |           |           |
| -1227.475874 a.u.                      |           |           |           |   |           |           |           |
| Pd                                     | -0.345553 | -0.077252 | -0.069806 | H | 2.512533  | 4.162272  | 0.968897  |
| C                                      | -2.330039 | -0.203666 | -0.356163 | H | 1.905543  | 5.648278  | 1.730711  |
| N                                      | -3.495537 | -0.293684 | -0.479052 | C | -0.812610 | 5.106154  | 1.458845  |
| C                                      | -4.924014 | -0.447861 | -0.610693 | H | -0.627909 | 6.162607  | 1.675056  |

|   |           |           |           |
|---|-----------|-----------|-----------|
| H | -1.733861 | 5.026752  | 0.875053  |
| H | -0.953775 | 4.577071  | 2.405238  |
| C | 0.554962  | 5.237074  | -0.673245 |
| H | -0.354267 | 5.155950  | -1.275270 |
| H | 0.766632  | 6.296815  | -0.502824 |
| H | 1.384894  | 4.802001  | -1.236306 |
| C | -5.603737 | 0.518779  | 0.377282  |
| H | -5.330889 | 1.554368  | 0.155983  |
| H | -6.690667 | 0.421178  | 0.299161  |
| H | -5.307070 | 0.293372  | 1.405241  |
| C | -5.309907 | -0.106675 | -2.062313 |
| H | -4.805160 | -0.775864 | -2.764331 |
| H | -6.390709 | -0.217441 | -2.191212 |
| H | -5.033918 | 0.923116  | -2.305278 |
| C | -5.280899 | -1.909157 | -0.278996 |
| H | -4.779943 | -2.595346 | -0.967071 |
| H | -4.977589 | -2.159497 | 0.741079  |
| H | -6.361899 | -2.053485 | -0.367696 |

#### Ti(OMe)<sub>2</sub>-C<sub>6</sub>H<sub>6</sub>

B3LYP/BS1 SCF energy: -1312.027499a.u.

M06-L/BS2 SCF energy in solution:  
-1312.107474 a.u.

M06-L/BS2 Free energy in solution:  
-1311.965672 a.u.

|    |           |           |           |
|----|-----------|-----------|-----------|
| Ti | -0.185917 | 0.047209  | 0.000796  |
| O  | -1.220072 | 1.523628  | 0.002532  |
| O  | -1.338059 | -1.323211 | -0.000506 |
| C  | 1.820216  | 1.184914  | 0.688812  |
| C  | 1.461942  | -0.024724 | 1.426019  |
| C  | 1.753229  | -1.251770 | 0.683495  |
| C  | 1.752221  | -1.249371 | -0.689040 |
| C  | 1.459820  | -0.019713 | -1.426836 |
| C  | 1.819255  | 1.187323  | -0.685887 |
| H  | 1.821844  | -2.190566 | 1.224375  |
| H  | 1.527015  | -0.019236 | -2.507749 |
| H  | 1.932548  | 2.122528  | -1.225161 |
| H  | 1.934269  | 2.118254  | 1.231165  |
| H  | 1.530587  | -0.028052 | 2.506842  |
| H  | 1.819961  | -2.186294 | -1.233282 |

|   |           |           |           |
|---|-----------|-----------|-----------|
| C | -2.508568 | 2.065876  | -0.001163 |
| H | -2.665231 | 2.696186  | 0.885418  |
| H | -2.661397 | 2.693307  | -0.890456 |
| H | -3.275399 | 1.277479  | -0.001518 |
| C | -2.427049 | -2.193530 | 0.000390  |
| H | -3.057949 | -2.035305 | -0.885741 |
| H | -2.088771 | -3.239312 | -0.007070 |
| H | -3.048637 | -2.044950 | 0.894725  |

#### Cr-Pyr

B3LYP/BS1 SCF energy: -1791.208705 a.u.

M06-L/BS2 SCF energy in solution:  
-1791.379784 a.u.

M06-L/BS2 Free energy in solution:  
-1791.176923 a.u.

|    |           |           |           |
|----|-----------|-----------|-----------|
| Cr | 0.540415  | 0.350115  | -0.001925 |
| O  | 0.334642  | 3.331515  | -0.015164 |
| O  | 2.583478  | 0.165872  | -2.184312 |
| O  | 2.586823  | 0.186894  | 2.179029  |
| N  | -0.330051 | -1.609403 | 0.006464  |
| C  | 0.488693  | 2.173256  | -0.010101 |
| C  | 1.813067  | 0.283544  | -1.314516 |
| C  | 1.815035  | 0.295985  | 1.309342  |
| C  | -0.796774 | -0.938364 | -1.149662 |
| C  | -1.579681 | 0.147867  | -0.719436 |
| C  | -1.578067 | 0.153275  | 0.722072  |
| C  | -0.794017 | -0.929638 | 1.158567  |
| C  | 0.306195  | -2.923755 | 0.010753  |
| H  | 0.938586  | -3.017782 | 0.892780  |
| H  | 0.936061  | -3.024807 | -0.872300 |
| H  | -0.447170 | -3.720531 | 0.014960  |
| C  | -0.619176 | -1.511447 | -2.520233 |
| H  | -0.937931 | -0.780221 | -3.264807 |
| H  | -1.227021 | -2.414816 | -2.656410 |
| H  | 0.423526  | -1.757358 | -2.736637 |
| C  | -2.341576 | 1.100759  | -1.594135 |
| H  | -1.957349 | 1.099722  | -2.616649 |
| H  | -2.264817 | 2.124797  | -1.220102 |
| H  | -3.405376 | 0.834933  | -1.632630 |
| C  | -2.337854 | 1.112870  | 1.591281  |

|   |           |           |          |
|---|-----------|-----------|----------|
| H | -1.952466 | 1.118237  | 2.613346 |
| H | -3.401899 | 0.848503  | 1.632800 |
| H | -2.260446 | 2.134308  | 1.210314 |
| C | -0.612980 | -1.492476 | 2.532935 |
| H | -0.930507 | -0.756035 | 3.272876 |
| H | 0.430385  | -1.736168 | 2.748677 |
| H | -1.219917 | -2.395213 | 2.677091 |

**Fe-Pyr<sup>+</sup>**

B3LYP/BS1 SCF energy: -1863.739515a.u.

M06-L/BS2 SCF energy in solution:

-1863.912209 a.u.

M06-L/BS2 Free energy in solution:

-1863.645639 a.u.

|    |           |           |           |
|----|-----------|-----------|-----------|
| Fe | 0.532847  | 0.018311  | -0.009958 |
| C  | -1.139201 | -0.994937 | 0.743698  |
| C  | -1.076454 | 0.357012  | 1.167915  |
| N  | -1.076348 | 1.159512  | -0.000459 |
| C  | -1.111487 | 0.329015  | -1.148683 |
| C  | -1.161193 | -1.012206 | -0.690024 |
| C  | -1.223096 | -2.190810 | 1.645704  |
| C  | -1.197605 | 0.939028  | 2.539635  |
| C  | -1.247178 | 2.617350  | -0.014986 |
| C  | -1.281695 | 0.876455  | -2.529508 |
| C  | -1.272712 | -2.229795 | -1.559360 |
| C  | 2.217247  | -0.286038 | 1.157527  |
| C  | 2.235124  | 1.020412  | 0.592917  |
| C  | 2.214772  | 0.887291  | -0.830471 |
| C  | 2.185636  | -0.502918 | -1.139245 |
| C  | 2.180044  | -1.228818 | 0.087774  |
| H  | -0.747251 | -2.007064 | 2.611554  |
| H  | -0.742052 | -3.063585 | 1.198804  |
| H  | -2.270975 | -2.450570 | 1.833889  |
| H  | -0.497166 | 1.760405  | 2.710658  |
| H  | -0.992572 | 0.170473  | 3.286484  |
| H  | -2.213590 | 1.310520  | 2.717243  |
| H  | -0.764611 | 3.050025  | 0.859839  |
| H  | -2.313010 | 2.862326  | -0.004429 |
| H  | -0.786762 | 3.030584  | -0.910934 |
| H  | -0.604016 | 1.707485  | -2.739865 |

|   |           |           |           |
|---|-----------|-----------|-----------|
| H | -2.309845 | 1.223159  | -2.686393 |
| H | -1.081541 | 0.095122  | -3.264379 |
| H | -0.847254 | -2.062330 | -2.551225 |
| H | -2.325016 | -2.506374 | -1.690049 |
| H | -0.758920 | -3.086378 | -1.117382 |
| H | 2.211263  | -0.522429 | 2.213086  |
| H | 2.261022  | 1.950533  | 1.145442  |
| H | 2.230188  | 1.697873  | -1.546634 |
| H | 2.152577  | -0.933734 | -2.130930 |
| H | 2.146749  | -2.304945 | 0.190002  |

**Ti-Pyr**

B3LYP/BS1 SCF energy: -2982.626279 a.u.

M06-L/BS2 SCF energy in solution:

-2982.884483 a.u.

M06-L/BS2 Free energy in solution:

-2982.250563 a.u.

|    |           |           |           |
|----|-----------|-----------|-----------|
| C  | -1.062453 | 5.633235  | 1.170255  |
| H  | -0.647897 | 5.510784  | 2.176751  |
| H  | -2.099035 | 5.280916  | 1.192588  |
| H  | -1.075981 | 6.706061  | 0.943857  |
| Ti | -0.042676 | 1.316788  | 0.584986  |
| Si | -0.041810 | 4.676160  | -0.103645 |
| N  | -1.737343 | 0.838930  | 1.644987  |
| N  | -0.028952 | -1.128062 | 0.094788  |
| N  | 1.643554  | 0.870164  | 1.663193  |
| N  | -0.067053 | 2.972199  | 0.286634  |
| C  | -2.191414 | 1.516044  | 2.758947  |
| H  | -1.599508 | 2.307075  | 3.198760  |
| C  | -3.415927 | 1.018404  | 3.152646  |
| H  | -4.002377 | 1.347707  | 4.000199  |
| C  | -3.755626 | -0.009818 | 2.230956  |
| H  | -4.686835 | -0.558953 | 2.202593  |
| C  | -2.705525 | -0.114727 | 1.331216  |
| C  | 1.884231  | 1.298816  | 2.952775  |
| H  | 1.330451  | 2.129940  | 3.368837  |
| C  | 2.858001  | 0.514196  | 3.536939  |
| H  | 3.243846  | 0.609791  | 4.543207  |
| C  | 3.257381  | -0.442510 | 2.561602  |
| H  | 4.007459  | -1.207921 | 2.692081  |



|   |           |           |           |                                         |           |           |           |
|---|-----------|-----------|-----------|-----------------------------------------|-----------|-----------|-----------|
| C | 2.501586  | -0.198716 | 1.424811  | H                                       | 1.285310  | -3.072604 | -1.028470 |
| C | 1.108426  | -0.596831 | -0.527079 | C                                       | 2.772243  | -4.575619 | -0.691112 |
| C | 0.659223  | 0.257787  | -1.535174 | H                                       | 2.162622  | -5.358676 | -1.133097 |
| H | 1.295446  | 0.827640  | -2.192885 | C                                       | 4.043383  | -4.867375 | -0.203114 |
| C | -0.763072 | 0.242592  | -1.529165 | H                                       | 4.432910  | -5.879846 | -0.253754 |
| H | -1.419813 | 0.798967  | -2.178692 | C                                       | 4.819447  | -3.837593 | 0.334731  |
| C | -1.180149 | -0.616264 | -0.513744 | H                                       | 5.822644  | -4.043163 | 0.697155  |
| C | -0.017460 | -2.022740 | 1.267802  | C                                       | 4.321264  | -2.538398 | 0.395381  |
| H | -0.119300 | -3.058562 | 0.944370  | H                                       | 4.953005  | -1.742911 | 0.774156  |
| H | -0.843830 | -1.752351 | 1.921456  | C                                       | 3.483963  | 0.063921  | -0.917094 |
| H | 0.922509  | -1.882358 | 1.797740  | C                                       | 3.759051  | -0.378946 | -2.221012 |
| C | 1.741246  | 5.310393  | -0.087179 | H                                       | 3.326766  | -1.310497 | -2.574420 |
| H | 2.185387  | 5.202023  | 0.908067  | C                                       | 4.590444  | 0.354644  | -3.066050 |
| H | 1.791590  | 6.370302  | -0.363936 | H                                       | 4.790095  | -0.007202 | -4.070863 |
| H | 2.364106  | 4.748108  | -0.791116 | C                                       | 5.172584  | 1.543059  | -2.618160 |
| C | -2.596945 | -0.883768 | 0.008428  | H                                       | 5.825554  | 2.113339  | -3.272649 |
| C | -3.624771 | -0.266451 | -1.001159 | C                                       | 4.913170  | 1.985767  | -1.321987 |
| C | -3.833500 | 1.124276  | -0.989988 | H                                       | 5.364363  | 2.904837  | -0.958968 |
| H | -3.308094 | 1.738587  | -0.267058 | C                                       | 4.073502  | 1.254042  | -0.476473 |
| C | -4.718509 | 1.726738  | -1.882207 | H                                       | 3.880659  | 1.609608  | 0.528716  |
| H | -4.857369 | 2.803755  | -1.850307 | C                                       | -0.782626 | 4.934810  | -1.828461 |
| C | -5.435069 | 0.952242  | -2.797425 | H                                       | -0.202104 | 4.405248  | -2.591987 |
| H | -6.132814 | 1.419754  | -3.486226 | H                                       | -1.812365 | 4.564131  | -1.874306 |
| C | -5.253134 | -0.428374 | -2.805188 | H                                       | -0.796811 | 5.996995  | -2.100077 |
| H | -5.812788 | -1.049518 | -3.499072 |                                         |           |           |           |
| C | -4.355448 | -1.031718 | -1.918681 | <b>IM3Ti-F</b>                          |           |           |           |
| H | -4.246429 | -2.108490 | -1.943786 | B3LYP/BS1 SCF energy: -2856.406803 a.u. |           |           |           |
| C | -2.788518 | -2.420017 | 0.108815  | M06-L/BS2 SCF energy in solution:       |           |           |           |
| C | -3.412522 | -3.042022 | 1.195611  | -2856.650992 a.u.                       |           |           |           |
| H | -3.747137 | -2.446720 | 2.034725  | M06-L/BS2 Free energy in solution:      |           |           |           |
| C | -3.573288 | -4.429684 | 1.233500  | -2856.483548 a.u.                       |           |           |           |
| H | -4.058027 | -4.884906 | 2.092552  |                                         |           |           |           |
| C | -3.109217 | -5.227630 | 0.188957  | Ti                                      | 0.385742  | -0.312165 | 0.046028  |
| H | -3.231862 | -6.306179 | 0.223246  | N                                       | 2.659112  | -0.803388 | 0.050326  |
| C | -2.478297 | -4.622961 | -0.899765 | C                                       | 5.424122  | -1.206171 | 0.187441  |
| H | -2.106387 | -5.227438 | -1.722386 | C                                       | 3.485227  | 0.172784  | 0.479349  |
| C | -2.322507 | -3.237191 | -0.936594 | C                                       | 3.207912  | -1.979125 | -0.311167 |
| H | -1.832459 | -2.784745 | -1.794742 | C                                       | 4.577589  | -2.219827 | -0.255170 |
| C | 2.537575  | -0.770506 | 0.001903  | C                                       | 4.863196  | 0.014293  | 0.561441  |
| C | 3.025634  | -2.236302 | -0.056258 | H                                       | 3.014133  | 1.104885  | 0.768691  |
| C | 2.271500  | -3.271591 | -0.621897 | H                                       | 2.519276  | -2.740036 | -0.658097 |

|    |           |           |           |    |           |           |           |
|----|-----------|-----------|-----------|----|-----------|-----------|-----------|
| H  | 4.962323  | -3.187768 | -0.557267 | H  | 1.781013  | -2.547116 | 0.016126  |
| H  | 5.476816  | 0.836616  | 0.912385  | H  | 3.863552  | -3.516151 | -0.936894 |
| H  | 6.497374  | -1.362347 | 0.239339  | H  | 5.518465  | 0.469725  | -0.952813 |
| C  | -2.679946 | -0.585681 | -0.004926 | H  | 5.788710  | -1.980150 | -1.447543 |
| C  | -4.833173 | -2.353638 | -0.182654 | C  | -2.650586 | -0.445268 | -0.026759 |
| C  | -3.647685 | -0.408809 | -1.000579 | C  | -5.089341 | -1.715298 | -0.495161 |
| C  | -2.789368 | -1.643628 | 0.902571  | C  | -3.774931 | 0.315731  | -0.381855 |
| C  | -3.866746 | -2.524666 | 0.809561  | C  | -2.745263 | -1.837803 | 0.097591  |
| C  | -4.720981 | -1.293354 | -1.085439 | C  | -3.965023 | -2.465752 | -0.143953 |
| H  | -3.546958 | 0.409858  | -1.706537 | C  | -4.990358 | -0.326167 | -0.606354 |
| H  | -2.042634 | -1.758499 | 1.681783  | H  | -3.700013 | 1.394533  | -0.452542 |
| H  | -3.950032 | -3.343769 | 1.517597  | H  | -1.872359 | -2.406068 | 0.396834  |
| H  | -5.468091 | -1.156231 | -1.861599 | H  | -4.038074 | -3.544816 | -0.047954 |
| H  | -5.669864 | -3.042149 | -0.253129 | H  | -5.863240 | 0.263201  | -0.870529 |
| Cl | 0.590000  | -0.076480 | 2.305451  | H  | -6.039534 | -2.208895 | -0.674836 |
| Cl | 0.074162  | -2.152700 | -1.219386 | Cl | 1.660586  | 1.799788  | 1.929689  |
| C  | -0.926970 | 2.640612  | 0.083076  | Cl | 0.223052  | -1.614900 | 2.245875  |
| N  | -1.551106 | 0.302077  | 0.076418  | C  | -0.495155 | 2.146580  | -0.713728 |
| C  | -1.800930 | 1.589861  | 0.327005  | N  | -1.389019 | 0.170244  | 0.168126  |
| C  | 0.884180  | 1.332090  | -0.958395 | C  | -1.157262 | 1.538947  | 0.398232  |
| C  | 0.289428  | 2.533065  | -0.627250 | C  | -0.057606 | -0.124148 | -1.173499 |
| F  | -2.983117 | 1.926696  | 0.858614  | C  | 0.012259  | 1.238857  | -1.625875 |
| F  | -1.299888 | 3.867627  | 0.488105  | F  | -2.033755 | 2.254331  | 1.140673  |
| F  | 0.826680  | 3.698007  | -1.027878 | F  | -0.225450 | 3.442641  | -0.756238 |
| F  | 1.887368  | 1.408277  | -1.873873 | F  | 0.679620  | 1.596856  | -2.732268 |
|    |           |           |           | F  | -0.256012 | -1.088157 | -2.070534 |

### TS3Ti-F

B3LYP/BS1 SCF energy: -2856.341774 a.u.

M06-L/BS2 SCF energy in solution:

-2856.584209 a.u.

M06-L/BS2 Free energy in solution:

-2856.41695 a.u.

|    |          |           |           |
|----|----------|-----------|-----------|
| Ti | 0.466655 | 0.124850  | 0.816640  |
| N  | 2.487988 | -0.602444 | 0.052326  |
| C  | 4.864227 | -1.594421 | -1.028593 |
| C  | 3.521458 | 0.220164  | -0.211784 |
| C  | 2.631049 | -1.915721 | -0.217070 |
| C  | 3.798800 | -2.450076 | -0.748878 |
| C  | 4.718689 | -0.235953 | -0.756548 |
| H  | 3.375054 | 1.262280  | 0.047021  |

### IM4Ti-F

B3LYP/BS1 SCF energy: -2856.358576 a.u.

M06-L/BS2 SCF energy in solution:

-2856.599551 a.u.

M06-L/BS2 Free energy in solution:

-2856.43131 a.u.

|    |          |           |           |
|----|----------|-----------|-----------|
| Ti | 0.495441 | -0.081228 | 0.932612  |
| N  | 2.427219 | -0.575736 | -0.025723 |
| C  | 4.806685 | -1.251010 | -1.314036 |
| C  | 3.369017 | 0.358282  | -0.265164 |
| C  | 2.663448 | -1.845027 | -0.416718 |
| C  | 3.839839 | -2.222105 | -1.053253 |
| C  | 4.562576 | 0.061621  | -0.915201 |



**TS3Ti-SiH<sub>3</sub>**

B3LYP/BS1 SCF energy: -3622.237911 a.u.

M06-L/BS2 SCF energy in solution:

-3622.427618 a.u.

M06-L/BS2 Free energy in solution:

-3622.17319 a.u.

|    |           |           |           |
|----|-----------|-----------|-----------|
| Ti | -0.422628 | -0.030895 | -0.830531 |
| N  | -2.477316 | -0.911132 | -0.401288 |
| C  | -5.001039 | -1.926588 | 0.238630  |
| C  | -3.504498 | -0.084919 | -0.120998 |
| C  | -2.702638 | -2.239135 | -0.373285 |
| C  | -3.943678 | -2.784164 | -0.061054 |
| C  | -4.773872 | -0.552275 | 0.207703  |
| H  | -3.294849 | 0.975268  | -0.190510 |
| H  | -1.859873 | -2.870976 | -0.628595 |
| H  | -4.069498 | -3.861328 | -0.059412 |
| H  | -5.564386 | 0.158058  | 0.423487  |
| H  | -5.982144 | -2.321205 | 0.485046  |
| C  | 2.605557  | -0.831199 | 0.125177  |
| C  | 4.951829  | -2.291473 | 0.566906  |
| C  | 3.607180  | -0.322464 | 0.970157  |
| C  | 2.774670  | -2.083287 | -0.481795 |
| C  | 3.947389  | -2.802902 | -0.257957 |
| C  | 4.777691  | -1.048981 | 1.180255  |
| H  | 3.452912  | 0.630670  | 1.465532  |
| H  | 2.002018  | -2.465635 | -1.136382 |
| H  | 4.077760  | -3.767834 | -0.738881 |
| H  | 5.547909  | -0.647544 | 1.832078  |
| H  | 5.862357  | -2.859000 | 0.734138  |
| Cl | -1.536658 | 1.575511  | -2.171280 |
| Cl | -0.109771 | -1.720644 | -2.365567 |
| C  | 0.354548  | 1.971182  | 0.393745  |
| N  | 1.416707  | -0.073434 | -0.069068 |
| C  | 1.440740  | 1.322105  | -0.247787 |
| H  | 2.228293  | 3.305753  | -1.960293 |
| H  | 3.364397  | 1.170704  | -2.230026 |
| H  | 3.920315  | 2.638349  | -0.391278 |
| H  | 0.910334  | 4.617472  | 0.951072  |
| H  | -1.417419 | 4.036720  | 0.726386  |
| H  | -0.012932 | 4.238021  | -1.243999 |

|    |           |           |           |
|----|-----------|-----------|-----------|
| C  | -0.112513 | -0.250414 | 1.162846  |
| C  | -0.366876 | 1.131773  | 1.315313  |
| H  | 0.619017  | -2.815995 | 1.699246  |
| H  | -1.498711 | -2.123439 | 2.621306  |
| H  | 0.561362  | -1.375398 | 3.643808  |
| H  | -0.888783 | 2.993087  | 3.350042  |
| H  | -1.535271 | 0.693475  | 3.731223  |
| H  | -2.835011 | 2.085714  | 2.265702  |
| Si | 2.815237  | 2.141782  | -1.256140 |
| Si | -0.063390 | 3.806503  | 0.166356  |
| Si | -1.451381 | 1.772875  | 2.712486  |
| Si | -0.100707 | -1.695415 | 2.351138  |

**IM4Ti-SiH<sub>3</sub>**

B3LYP/BS1 SCF energy: -3622.268319 a.u.

M06-L/BS2 SCF energy in solution:

-3622.458295 a.u.

M06-L/BS2 Free energy in solution:

-3622.20253 a.u.

|    |           |           |           |
|----|-----------|-----------|-----------|
| Ti | 0.369322  | 0.374974  | 0.793172  |
| N  | 2.534513  | -0.188002 | 0.738463  |
| C  | 5.243950  | -0.873449 | 0.731642  |
| C  | 3.489047  | 0.758764  | 0.631682  |
| C  | 2.923186  | -1.473914 | 0.857908  |
| C  | 4.262691  | -1.855020 | 0.847647  |
| C  | 4.846691  | 0.460191  | 0.628060  |
| H  | 3.138327  | 1.782100  | 0.560933  |
| H  | 2.128321  | -2.198543 | 0.989664  |
| H  | 4.519994  | -2.904477 | 0.941030  |
| H  | 5.571445  | 1.262656  | 0.545451  |
| H  | 6.296727  | -1.139353 | 0.727640  |
| C  | -2.824449 | -0.253315 | -0.004434 |
| C  | -5.539469 | -0.559226 | 0.525011  |
| C  | -3.726191 | -0.391844 | -1.065725 |
| C  | -3.268863 | -0.264818 | 1.318470  |
| C  | -4.632583 | -0.415825 | 1.576448  |
| C  | -5.085470 | -0.548909 | -0.796078 |
| H  | -3.360041 | -0.369908 | -2.087867 |
| H  | -2.550343 | -0.185709 | 2.126466  |
| H  | -4.981987 | -0.428323 | 2.604229  |

|                                                         |           |           |           |   |           |           |           |
|---------------------------------------------------------|-----------|-----------|-----------|---|-----------|-----------|-----------|
| H                                                       | -5.787916 | -0.656972 | -1.616990 | C | 2.387221  | 3.432816  | -0.589225 |
| H                                                       | -6.598417 | -0.679308 | 0.733481  | N | 1.461581  | 2.344659  | -0.352408 |
| Cl                                                      | 0.707269  | 2.169811  | 2.176866  | C | -1.476638 | -3.012783 | -0.178224 |
| Cl                                                      | -0.032348 | -1.419122 | 2.329062  | N | 1.111390  | -1.521803 | -0.013583 |
| C                                                       | 0.357960  | 0.981603  | -1.392607 | C | 2.405400  | -1.055059 | 0.357396  |
| N                                                       | -1.420870 | -0.076032 | -0.304164 | C | 2.604475  | -0.496958 | 1.630747  |
| C                                                       | -0.853593 | 1.244528  | -0.606317 | C | 3.494439  | -1.105800 | -0.531131 |
| H                                                       | -0.836603 | 3.935277  | -0.619865 | C | 3.852130  | 0.008333  | 2.002247  |
| H                                                       | -2.449256 | 2.943284  | 0.912453  | H | 1.768957  | -0.476419 | 2.323466  |
| H                                                       | -2.878502 | 2.958501  | -1.459572 | C | 4.740786  | -0.608460 | -0.152907 |
| H                                                       | 0.674875  | 2.977200  | -3.322814 | H | 3.352230  | -1.538231 | -1.515288 |
| H                                                       | 2.588100  | 1.596337  | -2.828139 | C | 4.928092  | -0.044696 | 1.113710  |
| H                                                       | 1.894410  | 3.307650  | -1.280061 | H | 3.985504  | 0.427430  | 2.996259  |
| C                                                       | -0.644141 | -1.086126 | -0.985203 | H | 5.571648  | -0.663943 | -0.851465 |
| C                                                       | 0.407224  | -0.447006 | -1.635406 | H | 5.902772  | 0.335153  | 1.406494  |
| H                                                       | -2.142231 | -3.100601 | 0.170307  | C | -4.974830 | 1.496277  | 1.565989  |
| H                                                       | 0.152650  | -3.678788 | -0.400952 | H | -4.845943 | 0.418626  | 1.692411  |
| H                                                       | -1.498588 | -3.449501 | -2.132322 | H | -4.434825 | 2.010753  | 2.365815  |
| H                                                       | 1.507794  | -0.894681 | -4.116159 | H | -6.037871 | 1.739933  | 1.651180  |
| H                                                       | 1.432097  | -2.799906 | -2.630809 | C | -5.192716 | 1.183111  | -0.942192 |
| H                                                       | 3.066759  | -1.055129 | -2.280677 | H | -6.262858 | 1.403913  | -0.889261 |
| Si                                                      | -1.816325 | 2.841367  | -0.421005 | H | -4.821451 | 1.491865  | -1.923421 |
| Si                                                      | 1.407857  | 2.275974  | -2.230970 | H | -5.042980 | 0.106236  | -0.834555 |
| Si                                                      | 1.676489  | -1.339011 | -2.709048 | C | -4.555553 | 3.457980  | 0.003097  |
| Si                                                      | -1.055008 | -2.923939 | -0.811312 | H | -4.154819 | 3.763540  | -0.967491 |
|                                                         |           |           |           | H | -5.604634 | 3.762344  | 0.054688  |
| <b>IM3Pd-F</b>                                          |           |           |           | H | -4.005261 | 3.981752  | 0.789928  |
| B3LYP/BS1 SCF energy: -1467.471842 a.u.                 |           |           |           | C | 1.576308  | 4.644969  | -1.080888 |
| M06-L/BS2 SCF energy in solution:<br>-1467.714253 a.u.  |           |           |           | H | 0.842508  | 4.954235  | -0.331271 |
| M06-L/BS2 Free energy in solution:<br>-1467.385212 a.u. |           |           |           | H | 2.254540  | 5.482545  | -1.266880 |
|                                                         |           |           |           | H | 1.050529  | 4.411551  | -2.010826 |
|                                                         |           |           |           | C | 3.100370  | 3.742656  | 0.739889  |
|                                                         |           |           |           | H | 3.813220  | 4.557967  | 0.585714  |
| Pd                                                      | -0.485119 | -0.193107 | 0.034298  | H | 2.381271  | 4.050901  | 1.504149  |
| C                                                       | -2.060267 | 0.945335  | 0.080416  | H | 3.640504  | 2.863726  | 1.100087  |
| N                                                       | -3.060999 | 1.546941  | 0.106941  | C | 3.391294  | 2.964586  | -1.658815 |
| C                                                       | -4.457541 | 1.935467  | 0.183246  | H | 3.929630  | 2.076480  | -1.319056 |
| C                                                       | -1.779649 | -1.713323 | 0.066349  | H | 2.878580  | 2.726709  | -2.594946 |
| C                                                       | -0.172438 | -3.545452 | -0.415938 | H | 4.112606  | 3.764288  | -1.851198 |
| C                                                       | 0.985664  | -2.836358 | -0.310494 | F | -3.114797 | -1.479783 | 0.342292  |
| C                                                       | 0.785827  | 1.414154  | -0.148861 | F | -2.469582 | -3.933871 | -0.197089 |

F -0.105560 -4.851069 -0.784997  
 F 2.130337 -3.535031 -0.503024

**TS3Pd-F**

B3LYP/BS1 SCF energy: -1467.418717 a.u.

M06-L/BS2 SCF energy in solution:

-1467.658119 a.u.

M06-L/BS2 Free energy in solution:

-1467.33553 a.u.

Pd -0.389870 0.077934 0.017736  
 C -2.376167 0.284071 -0.318322  
 N -3.539162 0.310626 -0.462435  
 C -4.973789 0.244770 -0.627097  
 C -0.324867 -1.974811 0.078187  
 C 0.848444 -2.472399 2.047599  
 C 1.758034 -1.663102 1.432811  
 C 0.334332 2.019282 0.259516  
 C 1.462363 4.345260 0.663070  
 N 0.812162 3.074926 0.431377  
 N 1.389851 -1.174456 0.202056  
 C -0.259350 -2.757117 1.217791  
 C 2.299461 -1.177946 -0.883906  
 C 1.977976 -0.499852 -2.070395  
 C 3.518610 -1.877343 -0.810512  
 C 2.857846 -0.510914 -3.152095  
 H 1.028745 0.026046 -2.135158  
 C 4.399006 -1.862479 -1.889079  
 H 3.777505 -2.413002 0.095574  
 C 4.076909 -1.184529 -3.067809  
 H 2.585452 0.013034 -4.064309  
 H 5.341860 -2.396780 -1.809359  
 H 4.763930 -1.187455 -3.908747  
 C 1.926081 4.894884 -0.698601  
 H 2.627874 4.205813 -1.175878  
 H 1.074611 5.044612 -1.368110  
 H 2.426899 5.856236 -0.551813  
 C 2.663367 4.096153 1.594702  
 H 3.178744 5.041832 1.786634  
 H 2.333731 3.678554 2.549763  
 H 3.370505 3.399064 1.137562

C 0.440708 5.291162 1.320340  
 H 0.091167 4.883921 2.272907  
 H 0.909952 6.261195 1.508425  
 H -0.423553 5.443810 0.668070  
 C -5.612284 1.259281 0.339220  
 H -5.274202 2.275125 0.116484  
 H -6.700931 1.225339 0.237833  
 H -5.352432 1.024611 1.375000  
 C -5.300158 0.597099 -2.090061  
 H -4.821313 -0.108421 -2.774254  
 H -6.382273 0.551582 -2.243700  
 H -4.956379 1.606270 -2.333199  
 C -5.420621 -1.190995 -0.293307  
 H -4.943396 -1.910799 -0.963457  
 H -5.157469 -1.449756 0.735724  
 H -6.505646 -1.272547 -0.407492  
 F -0.714889 -2.551992 -1.084474  
 F -1.040661 -3.855568 1.378487  
 F 0.957602 -2.881905 3.324140  
 F 2.856311 -1.157622 2.040329

**IM3Pd-SiH<sub>3</sub>**

B3LYP/BS1 SCF energy: -2233.316459 a.u.

M06-L/BS2 SCF energy in solution:

-2233.497904 a.u.

M06-L/BS2 Free energy in solution:

-2233.08653 a.u.

Pd -0.479628 0.269583 -0.231538  
 C -2.329522 0.983961 -0.135897  
 N -3.422795 1.388112 -0.044121  
 C -4.808102 1.799675 0.038505  
 C -1.172733 -1.633536 -0.649160  
 C 0.306285 -2.540337 1.166702  
 C 1.363924 -1.689277 0.881212  
 C 0.501055 2.049987 0.263844  
 C 2.147923 3.952544 0.969648  
 N 1.177003 2.940074 0.604679  
 N 1.295609 -0.798030 -0.180885  
 C -0.783012 -2.649809 0.163436  
 H -2.090723 -2.935821 -3.012925

|   |           |           |           |                                         |           |           |           |
|---|-----------|-----------|-----------|-----------------------------------------|-----------|-----------|-----------|
| H | -3.564762 | -1.294481 | -2.049907 | H                                       | -4.721409 | 2.869826  | -1.862930 |
| H | -1.563210 | -0.606974 | -3.154922 | C                                       | -5.600857 | 0.649908  | 0.687347  |
| H | -0.718482 | -5.417950 | -0.483717 | H                                       | -5.525285 | -0.259629 | 0.086066  |
| H | -2.227482 | -4.757228 | 1.264890  | H                                       | -5.224968 | 0.436030  | 1.691479  |
| H | -2.756864 | -4.231413 | -1.000916 | H                                       | -6.654688 | 0.933292  | 0.762816  |
| H | -0.819603 | -3.300216 | 3.630427  | Si                                      | -2.126078 | -1.652643 | -2.257407 |
| H | 0.181627  | -5.064527 | 2.361814  | Si                                      | -1.634804 | -4.333236 | -0.033894 |
| H | 1.569828  | -3.455477 | 3.449901  | Si                                      | 0.300378  | -3.618387 | 2.697308  |
| H | 2.400240  | -1.058513 | 3.397956  | Si                                      | 2.872254  | -1.433635 | 2.035549  |
| H | 3.774388  | -2.608353 | 2.180732  |                                         |           |           |           |
| H | 3.669498  | -0.287771 | 1.530860  |                                         |           |           |           |
| C | 2.356010  | -0.627624 | -1.057141 | <b>TS3Pd-SiH<sub>3</sub></b>            |           |           |           |
| C | 2.410612  | 0.477846  | -1.940622 | B3LYP/BS1 SCF energy: -2233.304870 a.u. |           |           |           |
| C | 3.408969  | -1.572232 | -1.142960 | M06-L/BS2 SCF energy in solution:       |           |           |           |
| C | 3.496001  | 0.667288  | -2.790026 | -2233.484726 a.u.                       |           |           |           |
| H | 1.578969  | 1.174035  | -1.964953 | M06-L/BS2 Free energy in solution:      |           |           |           |
| C | 4.497421  | -1.362777 | -1.988135 | -2233.07512 a.u.                        |           |           |           |
| H | 3.345116  | -2.492597 | -0.571400 | Pd                                      | 0.456913  | 0.283419  | 0.278014  |
| C | 4.562294  | -0.238338 | -2.811844 | C                                       | 2.452132  | 0.557795  | 0.317049  |
| H | 3.501861  | 1.527142  | -3.456001 | N                                       | 3.615953  | 0.698094  | 0.323535  |
| H | 5.290676  | -2.105568 | -2.018314 | C                                       | 5.057393  | 0.801548  | 0.341330  |
| H | 5.404258  | -0.087512 | -3.480426 | C                                       | 0.407046  | -1.812204 | 0.493031  |
| C | 3.000432  | 4.245045  | -0.279404 | C                                       | -0.735910 | -2.204800 | -1.588222 |
| H | 3.480423  | 3.332920  | -0.643226 | C                                       | -1.668441 | -1.325661 | -1.036487 |
| H | 2.383402  | 4.658091  | -1.082471 | C                                       | -0.200980 | 2.244826  | -0.102931 |
| H | 3.774264  | 4.975522  | -0.026230 | C                                       | -1.249901 | 4.479528  | -0.972680 |
| C | 3.012551  | 3.379439  | 2.107668  | N                                       | -0.641545 | 3.262121  | -0.482481 |
| H | 3.764161  | 4.119493  | 2.397361  | N                                       | -1.345950 | -0.814062 | 0.216359  |
| H | 2.399703  | 3.145445  | 2.982430  | C                                       | 0.283041  | -2.601763 | -0.635439 |
| H | 3.522929  | 2.468061  | 1.786228  | H                                       | 0.637052  | -3.622056 | 2.652976  |
| C | 1.384258  | 5.206270  | 1.429348  | H                                       | 2.370867  | -1.955311 | 2.457222  |
| H | 0.759910  | 4.986226  | 2.299747  | H                                       | 0.168386  | -1.321650 | 3.169985  |
| H | 2.100121  | 5.985831  | 1.704704  | H                                       | 0.486333  | -5.408216 | -1.012590 |
| H | 0.746124  | 5.590099  | 0.628464  | H                                       | 2.303477  | -4.099230 | -1.861890 |
| C | -4.876212 | 3.074079  | 0.898858  | H                                       | 2.044437  | -4.369375 | 0.499587  |
| H | -4.290665 | 3.880313  | 0.448289  | H                                       | -0.255507 | -1.955838 | -4.346985 |
| H | -5.915994 | 3.403733  | 0.978408  | H                                       | -0.090870 | -4.155798 | -3.410662 |
| H | -4.494394 | 2.884796  | 1.905824  | H                                       | -2.246357 | -3.145653 | -3.742444 |
| C | -5.303350 | 2.071480  | -1.394201 | H                                       | -2.880766 | -0.430386 | -3.345733 |
| H | -5.220270 | 1.171695  | -2.009032 | H                                       | -4.367434 | -1.644623 | -1.920891 |
| H | -6.352714 | 2.378662  | -1.362827 | H                                       | -3.665106 | 0.577192  | -1.311016 |

|    |           |           |           |                                         |           |           |           |
|----|-----------|-----------|-----------|-----------------------------------------|-----------|-----------|-----------|
| C  | -2.333238 | -0.646679 | 1.208592  | B3LYP/BS1 SCF energy: -2617.961094 a.u. |           |           |           |
| C  | -2.221039 | 0.360479  | 2.184859  | M06-L/BS2 SCF energy in solution:       |           |           |           |
| C  | -3.438147 | -1.520285 | 1.272797  | -2618.120392 a.u.                       |           |           |           |
| C  | -3.203099 | 0.514967  | 3.160918  | M06-L/BS2 Free energy in solution:      |           |           |           |
| H  | -1.354629 | 1.013886  | 2.166493  | -2617.78707 a.u.                        |           |           |           |
| C  | -4.424083 | -1.347059 | 2.243077  |                                         |           |           |           |
| H  | -3.500907 | -2.346457 | 0.572392  | Ti                                      | 0.524939  | -0.222080 | 1.135807  |
| C  | -4.316655 | -0.328417 | 3.191896  | N                                       | -1.076771 | -1.529892 | -0.186935 |
| H  | -3.095549 | 1.300384  | 3.904484  | C                                       | -2.898617 | -2.831058 | -1.875990 |
| H  | -5.270676 | -2.027839 | 2.267806  | C                                       | -2.192452 | -2.102647 | 0.300729  |
| H  | -5.079922 | -0.203979 | 3.954254  | C                                       | -0.870960 | -1.602477 | -1.516315 |
| C  | -2.141921 | 5.047183  | 0.146890  | C                                       | -1.745662 | -2.238502 | -2.390342 |
| H  | -2.923900 | 4.333355  | 0.418563  | C                                       | -3.122367 | -2.758673 | -0.504260 |
| H  | -1.550664 | 5.273630  | 1.038428  | H                                       | -2.328579 | -2.027333 | 1.373086  |
| H  | -2.616765 | 5.970023  | -0.198792 | H                                       | 0.042164  | -1.143011 | -1.875280 |
| C  | -2.087073 | 4.119777  | -2.214357 | H                                       | -1.520176 | -2.266189 | -3.451237 |
| H  | -2.566197 | 5.022578  | -2.604457 | H                                       | -4.002409 | -3.201115 | -0.049879 |
| H  | -1.455622 | 3.693792  | -2.998715 | H                                       | -3.603059 | -3.336889 | -2.529712 |
| H  | -2.863084 | 3.392665  | -1.961247 | C                                       | -1.056062 | 1.680188  | -0.223603 |
| C  | -0.123147 | 5.464916  | -1.332607 | C                                       | -3.717423 | 2.620955  | -0.270710 |
| H  | 0.524445  | 5.047912  | -2.108716 | C                                       | -1.737216 | 1.857307  | -1.445643 |
| H  | -0.558267 | 6.396082  | -1.706782 | C                                       | -1.729345 | 2.008498  | 0.969513  |
| H  | 0.487428  | 5.695217  | -0.455083 | C                                       | -3.050529 | 2.455348  | 0.943161  |
| C  | 5.490391  | 1.633121  | -0.880168 | C                                       | -3.047896 | 2.327950  | -1.462295 |
| H  | 5.056933  | 2.636378  | -0.840909 | H                                       | -1.241193 | 1.622751  | -2.381529 |
| H  | 6.580313  | 1.725676  | -0.891509 | H                                       | -1.200521 | 1.936719  | 1.915681  |
| H  | 5.172785  | 1.152276  | -1.809306 | H                                       | -3.547725 | 2.696533  | 1.878183  |
| C  | 5.467120  | 1.497144  | 1.652845  | H                                       | -3.552367 | 2.462169  | -2.415465 |
| H  | 5.134856  | 0.918355  | 2.518727  | H                                       | -4.739939 | 2.985373  | -0.291527 |
| H  | 6.556454  | 1.589031  | 1.692634  | Cl                                      | 2.072214  | 0.758519  | 2.504938  |
| H  | 5.031500  | 2.498227  | 1.714881  | Cl                                      | -0.729074 | -1.026081 | 2.918248  |
| C  | 5.636512  | -0.623733 | 0.270353  | C                                       | 2.625078  | 0.817498  | -0.940055 |
| H  | 5.300403  | -1.221209 | 1.121780  | N                                       | 0.249847  | 1.145961  | -0.141262 |
| H  | 5.322877  | -1.124177 | -0.649602 | C                                       | 1.251429  | 1.533242  | -1.162644 |
| H  | 6.729348  | -0.575104 | 0.286417  | C                                       | 1.407872  | 3.064450  | -1.163952 |
| Si | 0.915941  | -2.214441 | 2.247088  | H                                       | 1.913603  | 3.392870  | -0.250134 |
| Si | 1.290671  | -4.176437 | -0.769131 | H                                       | 0.430132  | 3.549455  | -1.203600 |
| Si | -0.841638 | -2.874913 | -3.328247 | H                                       | 1.980628  | 3.409647  | -2.027569 |
| Si | -3.213751 | -0.702367 | -1.919303 | C                                       | 3.655390  | 1.326582  | -1.966635 |
|    |           |           |           | H                                       | 3.313636  | 1.199818  | -3.000835 |
|    |           |           |           | H                                       | 4.606253  | 0.799825  | -1.861891 |

**IM3Ti-HMe**



|   |          |           |           |
|---|----------|-----------|-----------|
| H | 3.864092 | 2.386738  | -1.814018 |
| C | 1.847593 | -1.355731 | 0.101083  |
| C | 2.556371 | -0.726934 | -0.868165 |
| C | 1.861598 | -2.848789 | 0.358039  |
| H | 1.521467 | -3.426651 | -0.512079 |
| H | 1.208052 | -3.120553 | 1.193252  |
| H | 2.869681 | -3.196699 | 0.614584  |
| C | 3.402342 | -1.522478 | -1.845627 |
| H | 3.315121 | -1.140813 | -2.868235 |
| H | 3.118284 | -2.576337 | -1.853073 |
| H | 4.467901 | -1.476994 | -1.584017 |
| H | 0.879760 | 1.216848  | -2.152529 |
| H | 2.976746 | 1.147311  | 0.045564  |

**TS3Ti-HMe**

B3LYP/BS1 SCF energy: -2617.913518 a.u.

M06-L/BS2 SCF energy in solution:  
-2618.079713 a.u.

M06-L/BS2 Free energy in solution:  
-2617.74638 a.u.

|    |           |           |           |
|----|-----------|-----------|-----------|
| Ti | -0.469207 | 0.641363  | -0.571436 |
| N  | -2.225892 | -0.667268 | -0.073076 |
| C  | -4.461718 | -2.184397 | 0.655712  |
| C  | -3.095492 | -0.222992 | 0.860024  |
| C  | -2.478258 | -1.856224 | -0.657439 |
| C  | -3.575217 | -2.642410 | -0.315635 |
| C  | -4.216234 | -0.945909 | 1.249360  |
| H  | -2.883892 | 0.751571  | 1.284046  |
| H  | -1.786679 | -2.155359 | -1.436151 |
| H  | -3.727575 | -3.590458 | -0.819874 |
| H  | -4.882785 | -0.535449 | 1.999996  |
| H  | -5.329005 | -2.773028 | 0.938907  |
| C  | 2.132283  | -1.130397 | 0.060202  |
| C  | 3.280165  | -3.682540 | 0.516893  |
| C  | 3.470745  | -1.262832 | 0.495494  |
| C  | 1.389053  | -2.315323 | -0.136619 |
| C  | 1.954055  | -3.565411 | 0.092600  |
| C  | 4.029039  | -2.521262 | 0.711863  |
| H  | 4.084378  | -0.384936 | 0.658791  |
| H  | 0.372792  | -2.244347 | -0.503649 |

|    |           |           |           |
|----|-----------|-----------|-----------|
| H  | 1.355316  | -4.456688 | -0.074559 |
| H  | 5.063372  | -2.589911 | 1.037996  |
| H  | 3.721917  | -4.659533 | 0.686416  |
| Cl | -2.002419 | 2.398528  | -0.906147 |
| Cl | -0.363369 | -0.404367 | -2.672123 |
| C  | 1.199909  | 2.392012  | 0.100740  |
| N  | 1.521724  | 0.106377  | -0.159485 |
| C  | 2.305174  | 1.335688  | -0.095311 |
| C  | 3.146680  | 1.547371  | -1.360346 |
| H  | 2.504141  | 1.624346  | -2.242472 |
| H  | 3.825747  | 0.705771  | -1.516954 |
| H  | 3.750057  | 2.457078  | -1.277037 |
| C  | 1.685094  | 3.835319  | 0.254316  |
| H  | 2.333185  | 3.935888  | 1.131340  |
| H  | 0.843855  | 4.523182  | 0.364648  |
| H  | 2.252475  | 4.144938  | -0.626886 |
| C  | 0.117817  | 0.506772  | 1.356078  |
| C  | 0.341166  | 1.872221  | 1.257847  |
| C  | -0.052078 | -0.347991 | 2.562358  |
| H  | 0.628755  | -1.204000 | 2.458099  |
| H  | -1.061227 | -0.766303 | 2.645448  |
| H  | 0.201667  | 0.169678  | 3.495160  |
| C  | -0.219030 | 2.840922  | 2.276252  |
| H  | 0.553607  | 3.487659  | 2.706928  |
| H  | -0.701279 | 2.307709  | 3.100257  |
| H  | -0.975905 | 3.488679  | 1.816266  |
| H  | 2.955969  | 1.352227  | 0.791538  |
| H  | 0.652329  | 2.411119  | -0.894483 |

**IM4Ti-HMe**

B3LYP/BS1 SCF energy: -2617.966619 a.u.

M06-L/BS2 SCF energy in solution:  
-2618.121191 a.u.

M06-L/BS2 Free energy in solution:  
-2617.78486 a.u.

|    |           |           |           |
|----|-----------|-----------|-----------|
| Ti | 0.282439  | -1.202613 | 0.524223  |
| N  | -1.855433 | -0.969016 | -0.071717 |
| C  | -4.593333 | -0.945837 | -0.639900 |
| C  | -2.335963 | -1.529852 | -1.200615 |
| C  | -2.737183 | -0.411121 | 0.783973  |

|    |           |           |           |    |           |           |           |
|----|-----------|-----------|-----------|----|-----------|-----------|-----------|
| C  | -4.104964 | -0.370570 | 0.531212  | H  | 2.771791  | 1.810895  | -0.681254 |
| C  | -3.688561 | -1.543005 | -1.518057 | H  | 3.252082  | -0.669429 | 0.954393  |
| H  | -1.602796 | -1.986255 | -1.854508 |    |           |           |           |
| H  | -2.320422 | -0.004488 | 1.697749  |    |           |           |           |
| H  | -4.767547 | 0.095549  | 1.252180  |    |           |           |           |
| H  | -4.018755 | -2.013244 | -2.437851 |    |           |           |           |
| H  | -5.656085 | -0.935681 | -0.861828 |    |           |           |           |
| C  | 0.124683  | 2.063466  | -0.174368 |    |           |           |           |
| C  | -1.409653 | 4.414497  | -0.163493 |    |           |           |           |
| C  | 0.136446  | 2.924025  | -1.282081 |    |           |           |           |
| C  | -0.634553 | 2.407978  | 0.949897  | Ti | -0.042644 | -0.664171 | 0.011840  |
| C  | -1.399721 | 3.576027  | 0.951643  | N  | -2.273645 | 0.015466  | -0.122515 |
| C  | -0.634682 | 4.086813  | -1.277571 | C  | -4.872952 | 0.973938  | -0.499874 |
| H  | 0.752961  | 2.692161  | -2.143004 | C  | -2.496139 | 1.286199  | -0.514268 |
| H  | -0.598243 | 1.765237  | 1.822883  | C  | -3.340530 | -0.779294 | 0.081203  |
| H  | -1.982282 | 3.832167  | 1.832082  | C  | -4.650242 | -0.340923 | -0.097782 |
| H  | -0.621779 | 4.741220  | -2.144546 | C  | -3.771399 | 1.803167  | -0.710838 |
| H  | -2.006011 | 5.322230  | -0.161269 | H  | -1.612548 | 1.893079  | -0.678169 |
| Cl | 0.109985  | -3.487584 | 0.442291  | H  | -3.121187 | -1.791922 | 0.400069  |
| Cl | 0.202747  | -0.600770 | 2.792908  | H  | -5.472378 | -1.026326 | 0.077300  |
| C  | 3.061080  | -0.237461 | -0.040791 | H  | -3.890759 | 2.834096  | -1.025938 |
| N  | 0.955819  | 0.879908  | -0.132865 | H  | -5.882513 | 1.345786  | -0.647207 |
| C  | 2.418416  | 1.154736  | 0.130343  | Cl | 0.027492  | -0.218076 | -2.245986 |
| C  | 2.683030  | 1.832400  | 1.468657  | Cl | -0.749723 | -2.491151 | 1.184659  |
| H  | 2.299017  | 1.229201  | 2.295118  | C  | 2.666264  | 1.074301  | -0.048653 |
| H  | 2.226501  | 2.825018  | 1.518895  | N  | 1.898035  | -1.160134 | 0.069128  |
| H  | 3.763186  | 1.957199  | 1.600233  | C  | 2.896371  | -0.314119 | -0.204752 |
| C  | 4.416058  | -0.157971 | -0.763221 | C  | 4.214844  | -0.858243 | -0.698042 |
| H  | 4.304604  | 0.252612  | -1.773266 | H  | 4.253999  | -0.815633 | -1.793496 |
| H  | 4.880325  | -1.144583 | -0.848912 | H  | 4.332297  | -1.897336 | -0.398914 |
| H  | 5.112018  | 0.485703  | -0.212862 | H  | 5.052051  | -0.277519 | -0.306952 |
| C  | 0.863902  | -0.162907 | -1.166621 | C  | 3.716630  | 2.021186  | -0.597980 |
| C  | 1.966677  | -1.033685 | -0.788880 | H  | 4.241933  | 1.590744  | -1.452412 |
| C  | 0.315014  | 0.057493  | -2.551261 | H  | 4.476194  | 2.290524  | 0.149854  |
| H  | -0.681597 | 0.509390  | -2.547879 | H  | 3.264071  | 2.954231  | -0.942414 |
| H  | 0.243414  | -0.906821 | -3.064332 | C  | 0.465444  | 0.853508  | 1.107561  |
| H  | 0.967095  | 0.690533  | -3.170922 | C  | 1.576522  | 1.607166  | 0.705193  |
| C  | 2.381889  | -2.196999 | -1.664400 | C  | -0.407580 | 1.237330  | 2.287654  |
| H  | 3.028122  | -1.876216 | -2.494025 | H  | -1.060683 | 0.410540  | 2.583615  |
| H  | 1.518048  | -2.709679 | -2.095307 | H  | -1.064066 | 2.089774  | 2.060926  |
| H  | 2.932071  | -2.947614 | -1.087781 | H  | 0.191169  | 1.504502  | 3.167351  |

**IM3Ti-NF**

B3LYP/BS1 SCF energy: -2484.881912 a.u.

M06-L/BS2 SCF energy in solution:

-2485.038103 a.u.

M06-L/BS2 Free energy in solution:

-2484.81409 a.u.

|   |          |           |          |
|---|----------|-----------|----------|
| C | 1.693867 | 3.061788  | 1.141474 |
| H | 0.941852 | 3.319620  | 1.887410 |
| H | 1.551586 | 3.736851  | 0.288208 |
| H | 2.679071 | 3.287540  | 1.563238 |
| F | 2.313185 | -2.502587 | 0.168662 |

**TS3Ti-NF**

B3LYP/BS1 SCF energy: -2484.842133 a.u.

M06-L/BS2 SCF energy in solution:

-2485.011051 a.u.

M06-L/BS2 Free energy in solution:

-2484.79018 a.u.

|    |           |           |           |
|----|-----------|-----------|-----------|
| Ti | 0.259371  | -0.639381 | -0.233439 |
| N  | -1.931263 | -0.103552 | -0.170846 |
| C  | -4.608348 | 0.685584  | -0.162525 |
| C  | -2.330074 | 0.993457  | -0.846245 |
| C  | -2.856927 | -0.814265 | 0.502259  |
| C  | -4.199843 | -0.450065 | 0.534257  |
| C  | -3.653813 | 1.418569  | -0.867371 |
| H  | -1.558446 | 1.522449  | -1.394074 |
| H  | -2.496874 | -1.703376 | 1.006831  |
| H  | -4.905236 | -1.057169 | 1.090956  |
| H  | -3.923672 | 2.303355  | -1.433401 |
| H  | -5.650370 | 0.990833  | -0.161660 |
| Cl | 0.453515  | -0.225482 | -2.513753 |
| Cl | -0.288980 | -2.849358 | -0.013459 |
| C  | 1.987633  | 1.466682  | -0.024054 |
| N  | 1.794385  | -0.651438 | 1.014567  |
| C  | 2.468534  | 0.139899  | 0.096971  |
| C  | 3.628829  | -0.426719 | -0.671938 |
| H  | 3.632710  | -0.049278 | -1.696897 |
| H  | 3.586206  | -1.516262 | -0.685929 |
| H  | 4.575121  | -0.141605 | -0.196566 |
| C  | 2.593918  | 2.447847  | -0.985870 |
| H  | 3.685926  | 2.474058  | -0.909390 |
| H  | 2.217637  | 3.458360  | -0.811357 |
| H  | 2.341801  | 2.171772  | -2.018105 |
| C  | 0.396523  | 0.568745  | 1.414310  |
| C  | 0.914363  | 1.747721  | 0.856000  |
| C  | -0.307943 | 0.385727  | 2.721905  |

|   |           |           |          |
|---|-----------|-----------|----------|
| H | -0.282999 | -0.665748 | 3.023505 |
| H | -1.362509 | 0.677950  | 2.640047 |
| H | 0.144227  | 0.977448  | 3.526784 |
| C | 0.505079  | 3.144726  | 1.262685 |
| H | 1.358515  | 3.735631  | 1.616812 |
| H | -0.237177 | 3.117340  | 2.064415 |
| H | 0.059279  | 3.692954  | 0.424328 |
| F | 2.671461  | -1.801397 | 1.458179 |

**IM4Ti-NF**

B3LYP/BS1 SCF energy: -2484.891086 a.u.

M06-L/BS2 SCF energy in solution:

-2485.093130 a.u.

M06-L/BS2 Free energy in solution:

-2484.86702 a.u.

|    |           |           |           |
|----|-----------|-----------|-----------|
| Ti | 0.209763  | -0.001040 | -0.779348 |
| N  | -1.858042 | 0.000098  | -0.061846 |
| C  | -4.551872 | 0.001356  | 0.700084  |
| C  | -2.529951 | 1.159839  | 0.122372  |
| C  | -2.530404 | -1.159053 | 0.124665  |
| C  | -3.866292 | -1.197107 | 0.505058  |
| C  | -3.865857 | 1.199155  | 0.502689  |
| H  | -1.972035 | 2.070143  | -0.060697 |
| H  | -1.972770 | -2.069899 | -0.056573 |
| H  | -4.354440 | -2.156674 | 0.634947  |
| H  | -4.353621 | 2.159175  | 0.630637  |
| H  | -5.597016 | 0.001811  | 0.993047  |
| Cl | -0.033552 | 1.862194  | -2.055425 |
| Cl | -0.035327 | -1.865135 | -2.053761 |
| C  | 0.890317  | 0.715907  | 1.412514  |
| N  | 2.422591  | -0.001294 | -0.157068 |
| C  | 1.821466  | 1.111823  | 0.417162  |
| C  | 2.428720  | 2.451949  | 0.162702  |
| H  | 1.837840  | 3.266767  | 0.587142  |
| H  | 2.560089  | 2.631603  | -0.905999 |
| H  | 3.419163  | 2.423467  | 0.627653  |
| C  | 0.123806  | 1.610068  | 2.340163  |
| H  | 0.666705  | 1.717483  | 3.287391  |
| H  | -0.867484 | 1.212177  | 2.577028  |
| H  | 0.001022  | 2.613214  | 1.923349  |

|   |          |           |           |   |           |           |          |
|---|----------|-----------|-----------|---|-----------|-----------|----------|
| C | 1.819522 | -1.112092 | 0.419560  | C | 0.121305  | -1.602984 | 2.344221 |
| C | 0.889036 | -0.712389 | 1.414173  | H | 0.663031  | -1.706975 | 3.292503 |
| C | 2.424154 | -2.453958 | 0.167913  | H | -0.001080 | -2.607619 | 1.930875 |
| H | 2.557998 | -2.634585 | -0.900296 | H | -0.870265 | -1.204171 | 2.578433 |
| H | 1.829983 | -3.267030 | 0.591166  | F | 4.066673  | -0.001623 | 0.707607 |
| H | 3.413448 | -2.428098 | 0.635499  |   |           |           |          |
